# Supplementary material for: Anti-Allergic Effect of Dietary Polyphenols Curcumin and Epigallocatechin Gallate via Anti-Degranulation in IgE/Antigen-Stimulated Mast Cell Model: A Lipidomics Perspective
Source: Metabolites. 2023 May 5;13(5):628. doi: 10.3390/metabo13050628 (PMC10223132; doi:10.3390/metabo13050628)
Supplement: Supplementary file 1 [file metabolites-13-00628-s001.zip]

Archive with 5 entries (5 files):
- Supporting Information.pdf
- Table S1.xlsx
- Table S2.xlsx
- Table S3.xlsx
- Table S4.xlsx
