# Supplementary material for: Anti-Allergic Effect of Dietary Polyphenols Curcumin and Epigallocatechin Gallate via Anti-Degranulation in IgE/Antigen-Stimulated Mast Cell Model: A Lipidomics Perspective
Source: Metabolites. 2023 May 5;13(5):628. doi: 10.3390/metabo13050628 (PMC10223132; doi:10.3390/metabo13050628)
Supplement: Supplementary file 1 [file metabolites-13-00628-s001.zip › Table S1.xlsx]

## Sheet: Sheet1
Table S1. Statistical results of identification
Categories	Lipid subclass		Number	Analysis mode	Adduct type
Fatty acyls	Free fatty acid	FA	53	Neg	[M-H]-
	Oxidized free fatty acid	OxFA	4	Neg	[M-H]-
	Acylcarnitine	CAR	10	Pos	[M+H]+
	N-acyl ethanolamines	NAE	7	Pos	[M+H]+
	Fatty amides	13-Docosenamide	1	Pos	[M+H]+
Glycerolipids	Diacylglycerol	DG	12	Pos	[M+NH4]+
	Ether-linked diacylglycerol	DG-O	2	Pos	[M+NH4]+
	Triacylglycerol	TG	96	Pos	[M+NH4]+
	Ether-linked triacylglycerol	TG-O	51	Pos	[M+NH4]+
Glycerophospholipids	Lysophosphatidic acid	LPA	2	Neg	[M-H]-
	Lysophophatidylcholine	LPC	24	Pos	[M+H]+
	Ether-linked lysophosphatidylcholine	LPC-O	10	Pos	[M+H]+
	Phosphatidylcholine	PC	131	Pos	[M+H]+
	Ether-linked phosphatidylcholine	PC-O	86	Pos	[M+H]+
	Elaidyl phosphatidylcholine	Elaidyl PC	1	Pos	[M+H]+
	Lysophosphatidylethanolamine	LPE	17	Neg	[M-H]-
	Ether-linked lysophosphatidylethanolamine	LPE-O	5	Pos	[M+H]+
	Phosphatidylethanolamine	PE	61	Neg	[M-H]-
	Ether-linked phosphatidylethanolamine	PE-O&P	50	Pos	[M+H]+
	Oxidized phosphatidylethanolamine	OxPE	18	Neg	[M-H]-
	Lysophosphatidylglycerol	LPG	3	Neg	[M-H]-
	Phosphatidylglycerol	PG	29	Neg	[M-H]-
	Lysophosphatidylinositol	LPI	2	Neg	[M-H]-
	Phosphatidylinositol	PI	43	Neg	[M-H]-
	Ether-linked phosphatidylinositol	PI-O	13	Neg	[M-H]-
	Lysophosphatidylserine	LPS	1	Neg	[M-H]-
	Phosphatidylserine	PS	22	Neg	[M-H]-
	Cardiolipin	CL	49	Neg	[M-H]-
	Bismonoacylglycerophosphate	BMP	3	Pos	[M+NH4]+
	Hemibismonoacylglycerophosphate	HBMP	7	Neg	[M-H]-
	Phosphatidylethanol	PEtOH	5	Neg	[M-H]-
Sphingolipids	Sphingosine	SPH	1	Pos	[M+H]+
	Ceramides	Cer	43	Pos	[M+H]+ or [M+H]+-2H2O
	Ceramide 1-phosphates	CerP	2	Neg	[M-H]-
	Hexosylceramide	HexCer	19	Pos	[M+H]+ or [M+H]+-H2O
	Acylsphingomyelin	ASM	2	Pos	[M+H]+
	Sphingomyelin	SM	55	Pos	[M+H]+
	Gangliosides	GM3	1	Neg	[M-H]-
Sterol	Cholesteryl ester	CE	7	Pos	[M+NH4]+
	Cholesterol	ST	7	Pos	[M+H]+ or [M+H]+-H2O
Prenol	Coenzyme Q	CoQ	2	Pos	[M+H]+
Sum			957
