# Supplementary material for: Anti-Allergic Effect of Dietary Polyphenols Curcumin and Epigallocatechin Gallate via Anti-Degranulation in IgE/Antigen-Stimulated Mast Cell Model: A Lipidomics Perspective
Source: Metabolites. 2023 May 5;13(5):628. doi: 10.3390/metabo13050628 (PMC10223132; doi:10.3390/metabo13050628)
Supplement: Supplementary file 1 [file metabolites-13-00628-s001.zip › Table S2.xlsx]

## Sheet: Table S2
Table S2. Information of identified lipids.
Compound	Analytical mode	Adduct type	m/z	tR(min)	Fatty Acid	Categories	Identification level
CerP 30:1; 2O	Negative	[M-H]-	560.409	4.98	(18:1;2O_12:0)	Sphingolipids	level2
CerP 34:4; 4O	Negative	[M-H]-	642.414	5.05	(16:2;2O_18:2+2O)	Sphingolipids	level2
CL 62:1	Negative	[M-H]-	1321.92	12.62	(12:0_16:0_16:0_18:1; 14:0_14:0_16:0_18:1)	Glycerophospholipids	level2
CL 64:1	Negative	[M-H]-	1349.95	12.93	(14:0_16:0_16:0_18:1)	Glycerophospholipids	level2
CL 64:2	Negative	[M-H]-	1347.93	12.69	(14:0_16:1_16:0_18:1; 14:0_16:0_16:0_18:2)	Glycerophospholipids	level2
CL 66:1	Negative	[M-H]-	1377.98	13.25	(14:0_16:0_18:0_18:1)	Glycerophospholipids	level2
CL 66:2	Negative	[M-H]-	1375.96	13	(14:0_18:1_16:0_18:1)	Glycerophospholipids	level2
CL 66:3	Negative	[M-H]-	1373.95	12.72	(14:0_18:1_16:1_18:1)	Glycerophospholipids	level2
CL 66:4	Negative	[M-H]-	1371.93	12.44	(14:0_16:1_18:1_18:2)	Glycerophospholipids	level2
CL 66:5	Negative	[M-H]-	1369.92	12.13	(16:1_16:1_16:1_18:2)	Glycerophospholipids	level2
CL 67:2	Negative	[M-H]-	1389.98	13.18	(15:0_18:1_16:0_18:1)	Glycerophospholipids	level2
CL 67:3	Negative	[M-H]-	1387.96	12.9	(15:0_18:1_16:1_18:1; 15:0_18:1_16:0_18:2)	Glycerophospholipids	level2
CL 67:4	Negative	[M-H]-	1385.95	12.62	(16:1_17:1_17:1_17:1; 14:0_17:1_18:1_18:2; 15:0_16:1_18:1_18:2)	Glycerophospholipids	level2
CL 68:2	Negative	[M-H]-	1404	13.32	(16:0_18:1_16:0_18:1)	Glycerophospholipids	level2
CL 68:3	Negative	[M-H]-	1401.98	13.04	(16:0_18:1_16:1_18:1; 14:0_18:1_18:1_18:1)	Glycerophospholipids	level2
CL 68:4	Negative	[M-H]-	1399.96	12.76	(16:0_18:2_16:1_18:1; 16:1_18:1_16:1_18:1; 14:0_18:1_18:1_18:2)	Glycerophospholipids	level2
CL 68:5	Negative	[M-H]-	1397.95	12.48	(16:1_16:1_18:1_18:2; 14:0_18:1_18:2_18:2)	Glycerophospholipids	level2
CL 68:6	Negative	[M-H]-	1395.93	12.2	(16:1_18:2_16:1_18:2; 14:0_18:2_18:2_18:2)	Glycerophospholipids	level2
CL 69:2	Negative	[M-H]-	1418.01	13.46	(16:0_18:1_17:0_18:1; 15:0_18:0_18:1_18:1; 16:0_18:0_17:1_18:1)	Glycerophospholipids	level2
CL 69:3	Negative	[M-H]-	1416	13.18	(16:0_18:1_17:1_18:1)	Glycerophospholipids	level2
CL 69:4	Negative	[M-H]-	1413.98	12.93	(15:0_18:1_18:1_18:2)	Glycerophospholipids	level2
CL 69:5	Negative	[M-H]-	1411.96	12.69	(16:1_17:1_18:1_18:2)	Glycerophospholipids	level2
CL 69:6	Negative	[M-H]-	1409.95	12.39	(16:1_17:1_18:2_18:2)	Glycerophospholipids	level2
CL 70:2	Negative	[M-H]-	1432.03	13.6	(16:0_18:1_18:0_18:1)	Glycerophospholipids	level2
CL 70:3	Negative	[M-H]-	1430.01	13.35	(16:0_18:1_18:1_18:1)	Glycerophospholipids	level2
CL 70:4	Negative	[M-H]-	1428	13.04	(16:0_18:1_18:1_18:2; 16:1_18:1_18:1_18:1)	Glycerophospholipids	level2
CL 70:5	Negative	[M-H]-	1425.98	12.79	(16:1_18:1_18:1_18:2; 16:0_18:1_18:2_18:2)	Glycerophospholipids	level2
CL 70:6	Negative	[M-H]-	1423.96	12.55	(16:1_18:2_18:1_18:2; 16:0_18:2_18:2_18:2; 14:0_18:1_18:2_20:3)	Glycerophospholipids	level2
CL 70:7	Negative	[M-H]-	1421.95	12.27	(16:1_18:2_18:2_18:2)	Glycerophospholipids	level2
CL 71:2	Negative	[M-H]-	1446.04	13.74	(17:0_18:1_18:0_18:1)	Glycerophospholipids	level2
CL 71:3	Negative	[M-H]-	1444.03	13.49	(17:0_18:1_18:1_18:1)	Glycerophospholipids	level2
CL 71:4	Negative	[M-H]-	1442.01	13.21	(17:1_18:1_18:1_18:1; 16:1_18:1_18:1_19:1)	Glycerophospholipids	level2
CL 71:5	Negative	[M-H]-	1440	12.97	(17:1_18:1_18:1_18:2)	Glycerophospholipids	level2
CL 71:6	Negative	[M-H]-	1437.98	12.72	(17:1_18:2_18:1_18:2; 16:1_17:1_18:1_20:3)	Glycerophospholipids	level2
CL 71:7	Negative	[M-H]-	1435.96	12.48	(17:1_16:1_18:2_20:3)	Glycerophospholipids	level2
CL 72:2	Negative	[M-H]-	1460.06	13.88	(18:1_18:0_18:1_18:0)	Glycerophospholipids	level2
CL 72:3	Negative	[M-H]-	1458.04	13.67	(18:0_18:1_18:1_18:1)	Glycerophospholipids	level2
CL 72:4	Negative	[M-H]-	1456.03	13.39	(18:1_18:1_18:1_18:1; 18:0_18:1_18:1_18:2)	Glycerophospholipids	level2
CL 72:5	Negative	[M-H]-	1454.01	13.11	(18:1_18:1_18:1_18:2; 16:0_18:1_18:1_20:3)	Glycerophospholipids	level2
CL 72:6	Negative	[M-H]-	1452	12.83	(16:0_20:3_18:1_18:2; 16:1_20:3_18:1_18:1; 18:1_18:1_18:2_18:2)	Glycerophospholipids	level2
CL 72:7	Negative	[M-H]-	1449.98	12.62	(16:1_20:3_18:1_18:2; 18:1_18:2_18:2_18:2)	Glycerophospholipids	level2
CL 72:8	Negative	[M-H]-	1447.96	12.34	(18:2_18:2_18:2_18:2; 16:1_18:2_18:2_20:3)	Glycerophospholipids	level2
CL 73:5	Negative	[M-H]-	1468.03	13.28	(37:2_36:3; 17:0_18:1_18:1_20:3; 16:0_18:1_19:1_20:3)	Glycerophospholipids	level2
CL 73:6	Negative	[M-H]-	1466.01	13.04	(36:3_37:3; 17:1_18:1_18:1_20:3)	Glycerophospholipids	level2
CL 73:8	Negative	[M-H]-	1461.98	12.51	(17:1_18:2_18:2_20:3)	Glycerophospholipids	level2
CL 74:11	Negative	[M-H]-	1469.95	12.34	(18:2_18:2_18:2_20:5)	Glycerophospholipids	level2
CL 74:6	Negative	[M-H]-	1480.03	13.22	(18:0_18:2_18:1_20:3; 18:1_18:1_18:1_20:3; 18:1_18:2_18:1_20:2; 16:0_18:1_20:2_20:3)	Glycerophospholipids	level2
CL 74:7	Negative	[M-H]-	1478.01	12.93	(18:1_18:2_18:1_20:3; 16:0_18:1_18:1_22:5)	Glycerophospholipids	level2
CL 74:8	Negative	[M-H]-	1476	12.69	(18:1_18:2_18:2_20:3; 18:1_18:1_18:2_20:4)	Glycerophospholipids	level2
CL 74:9	Negative	[M-H]-	1473.98	12.41	(40:3_34:6; 18:1_18:2_18:2_20:4; 18:2_18:2_18:2_20:3)	Glycerophospholipids	level2
CL 76:8	Negative	[M-H]-	1504.03	13.06	(18:1_18:1_20:3_20:3)	Glycerophospholipids	level2
FA 13:0	Negative	[M-H]-	213.186	1.54	(13:0)	Fatty acyls	level2
FA 14:0	Negative	[M-H]-	227.202	1.67	(14:0)	Fatty acyls	level2
FA 14:1	Negative	[M-H]-	225.186	1.5	(14:1)	Fatty acyls	level2
FA 15:0	Negative	[M-H]-	241.217	1.88	(15:0)	Fatty acyls	level2
FA 15:1	Negative	[M-H]-	239.202	1.67	(15:1)	Fatty acyls	level2
FA 16:0	Negative	[M-H]-	255.233	2.12	(16:0)	Fatty acyls	level2
FA 16:1	Negative	[M-H]-	253.217	1.81	(16:1)	Fatty acyls	level2
FA 16:2	Negative	[M-H]-	251.202	1.6	(16:2)	Fatty acyls	level2
FA 17:0	Negative	[M-H]-	269.249	2.4	(17:0)	Fatty acyls	level2
FA 17:1	Negative	[M-H]-	267.233	2.05	(17:1)	Fatty acyls	level2
FA 18:0	Negative	[M-H]-	283.264	2.8	(18:0)	Fatty acyls	level2
FA 18:1	Negative	[M-H]-	281.249	2.26	(18:1)	Fatty acyls	level2
FA 18:2	Negative	[M-H]-	279.233	1.91	(18:2)	Fatty acyls	level2
FA 18:3	Negative	[M-H]-	277.217	1.67	(18:3)	Fatty acyls	level2
FA 19:0	Negative	[M-H]-	297.28	3.24	(19:0)	Fatty acyls	level2
FA 19:1	Negative	[M-H]-	295.264	2.59	(19:1)	Fatty acyls	level2
FA 19:2	Negative	[M-H]-	293.249	2.17	(19:2)	Fatty acyls	level2
FA 20:0	Negative	[M-H]-	311.296	3.81	(20:0)	Fatty acyls	level2
FA 20:1	Negative	[M-H]-	309.28	2.94	(20:1)	Fatty acyls	level2
FA 20:2	Negative	[M-H]-	307.264	2.47	(20:2)	Fatty acyls	level2
FA 20:3	Negative	[M-H]-	305.249	2.09	(20:3)	Fatty acyls	level2
FA 20:4	Negative	[M-H]-	303.233	1.84	(20:4)	Fatty acyls	level2
FA 20:5	Negative	[M-H]-	301.217	1.6	(20:5)	Fatty acyls	level2
FA 21:0-2peaks	Negative	[M-H]-	325.311	4.42	(21:0)	Fatty acyls	level2
FA 21:1	Negative	[M-H]-	323.296	3.43	(21:1)	Fatty acyls	level2
FA 21:2	Negative	[M-H]-	321.28	2.8	(21:2)	Fatty acyls	level2
FA 21:3	Negative	[M-H]-	319.264	2.36	(21:3)	Fatty acyls	level2
FA 22:0	Negative	[M-H]-	339.327	5.12	(22:0)	Fatty acyls	level2
FA 22:1	Negative	[M-H]-	337.311	3.99	(22:1)	Fatty acyls	level2
FA 22:2	Negative	[M-H]-	335.296	3.19	(22:2)	Fatty acyls	level2
FA 22:3	Negative	[M-H]-	333.28	2.66	(22:3)	Fatty acyls	level2
FA 22:4	Negative	[M-H]-	331.264	2.22	(22:4)	Fatty acyls	level2
FA 22:5	Negative	[M-H]-	329.249	1.91	(22:5)	Fatty acyls	level2
FA 22:6	Negative	[M-H]-	327.233	1.67	(22:6)	Fatty acyls	level2
FA 23:0	Negative	[M-H]-	353.342	5.78	(23:0)	Fatty acyls	level2
FA 23:1	Negative	[M-H]-	351.327	4.64	(23:1)	Fatty acyls	level2
FA 24:0	Negative	[M-H]-	367.358	6.48	(24:0)	Fatty acyls	level2
FA 24:1	Negative	[M-H]-	365.342	5.22	(24:1)	Fatty acyls	level2
FA 24:2	Negative	[M-H]-	363.327	4.27	(24:2)	Fatty acyls	level2
FA 24:3	Negative	[M-H]-	361.311	3.49	(24:3)	Fatty acyls	level2
FA 24:4	Negative	[M-H]-	359.296	2.83	(24:4)	Fatty acyls	level2
FA 24:5	Negative	[M-H]-	357.28	2.36	(24:5)	Fatty acyls	level2
FA 24:6	Negative	[M-H]-	355.264	2.09	(24:6)	Fatty acyls	level2
FA 25:0	Negative	[M-H]-	381.374	7.13	(25:0)	Fatty acyls	level2
FA 25:1	Negative	[M-H]-	379.358	5.89	(25:1)	Fatty acyls	level2
FA 26:0	Negative	[M-H]-	395.389	7.72	(26:0)	Fatty acyls	level2
FA 26:1	Negative	[M-H]-	393.374	6.51	(26:1)	Fatty acyls	level2
FA 26:2	Negative	[M-H]-	391.358	5.48	(26:2)	Fatty acyls	level2
FA 26:3	Negative	[M-H]-	389.342	4.58	(26:3)	Fatty acyls	level2
FA 26:4	Negative	[M-H]-	387.327	3.78	(26:4)	Fatty acyls	level2
FA 28:7	Negative	[M-H]-	409.311	5.89	(28:7)	Fatty acyls	level2
FA 34:9	Negative	[M-H]-	489.374	5.78	(34:9)	Fatty acyls	level2
FA 36:10	Negative	[M-H]-	515.39	6.51	(36:10)	Fatty acyls	level2
GM3 34:1; 2O	Negative	[M-H]-	1151.71	5.61	—	Sphingolipids	level2
HBMP 56:7	Negative	[M-H]-	1057.75	10.97	(16:0_18:1_22:6)	Glycerophospholipids	level2
HBMP 58:7	Negative	[M-H]-	1085.78	11.49	(18:0_18:1_22:6)	Glycerophospholipids	level2
HBMP 58:8	Negative	[M-H]-	1083.76	11.11	(18:1_18:1_22:6)	Glycerophospholipids	level2
HBMP 60:12	Negative	[M-H]-	1103.73	10.31	(16:0_22:6_22:6)	Glycerophospholipids	level2
HBMP 62:12	Negative	[M-H]-	1131.76	10.87	(18:0_22:6_22:6)	Glycerophospholipids	level2
HBMP 62:13	Negative	[M-H]-	1129.75	10.38	(18:1_22:6_22:6)	Glycerophospholipids	level2
HBMP 64:16	Negative	[M-H]-	1151.73	9.83	(20:4_22:6_22:6)	Glycerophospholipids	level2
LPA 16:0	Negative	[M-H]-	409.236	1.74	(16:0)	Glycerophospholipids	level2
LPA 19:0	Negative	[M-H]-	451.283	2.59	(19:0)	Glycerophospholipids	level2
LPE 16:0	Negative	[M-H]-	452.278	1.81	(16:0)	Glycerophospholipids	level2
LPE 16:1	Negative	[M-H]-	450.263	1.57	(16:1)	Glycerophospholipids	level2
LPE 17:0	Negative	[M-H]-	466.294	2.09	(17:0)	Glycerophospholipids	level2
LPE 17:1	Negative	[M-H]-	464.278	1.67	(17:1)	Glycerophospholipids	level2
LPE 18:0	Negative	[M-H]-	480.31	2.33	(18:0)	Glycerophospholipids	level2
LPE 18:1	Negative	[M-H]-	478.294	1.91	(18:1)	Glycerophospholipids	level2
LPE 18:2	Negative	[M-H]-	476.278	1.64	(18:2)	Glycerophospholipids	level2
LPE 20:1	Negative	[M-H]-	506.325	2.4	(20:1)	Glycerophospholipids	level2
LPE 20:2	Negative	[M-H]-	504.31	2.02	(20:2)	Glycerophospholipids	level2
LPE 20:3	Negative	[M-H]-	502.294	1.74	(20:3)	Glycerophospholipids	level2
LPE 20:4	Negative	[M-H]-	500.278	1.6	(20:4)	Glycerophospholipids	level2
LPE 20:5	Negative	[M-H]-	498.263	1.47	(20:5)	Glycerophospholipids	level2
LPE 22:3	Negative	[M-H]-	530.325	2.19	(22:3)	Glycerophospholipids	level2
LPE 22:4	Negative	[M-H]-	528.31	1.84	(22:4)	Glycerophospholipids	level2
LPE 22:5	Negative	[M-H]-	526.294	1.67	(22:5)	Glycerophospholipids	level2
LPE 22:6	Negative	[M-H]-	524.278	1.57	(22:6)	Glycerophospholipids	level2
LPE 24:0	Negative	[M-H]-	564.404	5.51	(24:0)	Glycerophospholipids	level2
LPG 18:0	Negative	[M-H]-	511.304	1.81	(18:0)	Glycerophospholipids	level2
LPG 18:1	Negative	[M-H]-	509.289	1.57	(18:1)	Glycerophospholipids	level2
LPG 22:6	Negative	[M-H]-	555.273	1.23	(22:6)	Glycerophospholipids	level2
LPI 18:0	Negative	[M-H]-	599.32	1.81	(18:0)	Glycerophospholipids	level2
LPI 18:1	Negative	[M-H]-	597.304	1.54	(18:1)	Glycerophospholipids	level2
LPS 18:1	Negative	[M-H]-	522.284	1.54	(18:1)	Glycerophospholipids	level2
OxFA 16:1; O	Negative	[M-H]-	269.212	1.26	(16:1; O)	Fatty acyls	level2
OxFA 17:0; O	Negative	[M-H]-	285.243	1.5	(17:0; O)	Fatty acyls	level2
OxFA 18:1; O	Negative	[M-H]-	297.243	1.43	(18:1; O)	Fatty acyls	level2
OxFA 18:2; O	Negative	[M-H]-	295.228	1.29	(18:2; O)	Fatty acyls	level2
OxPE 34:1;O	Negative	[M-H]-	732.518	8.06	(18:1_16:0;O)	Glycerophospholipids	level2
OxPE 36:1;O	Negative	[M-H]-	760.55	8.96	(18:1_18:0;O)	Glycerophospholipids	level2
OxPE 36:2;2O	Negative	[M-H]-	774.529	5.78	(18:1_18:1;2O)	Glycerophospholipids	level2
OxPE 36:2;O	Negative	[M-H]-	758.534	8.27	(18:2_18:0;O)	Glycerophospholipids	level2
OxPE 36:3;O	Negative	[M-H]-	756.518	7.58	(20:3_16:0;O)	Glycerophospholipids	level2
OxPE 36:4;O	Negative	[M-H]-	754.503	7.2	(20:4_16:0;O)	Glycerophospholipids	level2
OxPE 36:5;O	Negative	[M-H]-	752.487	6.48	(20:5_16:0;O)	Glycerophospholipids	level2
OxPE 37:4;O	Negative	[M-H]-	768.518	7.72	(20:4_17:0;O)	Glycerophospholipids	level2
OxPE 38:3;O	Negative	[M-H]-	784.55	8.54	(20:3_18:0;O)	Glycerophospholipids	level2
OxPE 38:4;2O-1	Negative	[M-H]-	798.529	6.62	(18:0_20:4;2O)	Glycerophospholipids	level2
OxPE 38:4;2O-2	Negative	[M-H]-	798.529	7.07	(18:0_20:4;2O)	Glycerophospholipids	level2
OxPE 38:4;O	Negative	[M-H]-	782.534	8.23	(20:4_18:0;O)	Glycerophospholipids	level2
OxPE 38:5;O-2peaks	Negative	[M-H]-	780.518	7.4	(20:4_18:1;O；22:5_16:0;O)	Glycerophospholipids	level2
OxPE 38:6;O-2peaks	Negative	[M-H]-	778.503	6.92	(16:1_22:5;O；18:1_20:5;O)	Glycerophospholipids	level2
OxPE 40:5;O	Negative	[M-H]-	808.55	8.2	(22:5_18:0;O)	Glycerophospholipids	level2
OxPE 40:6;O	Negative	[M-H]-	806.534	7.92	(18:1_22:5;O；18:0_22:6;O)	Glycerophospholipids	level2
OxPE 40:7;O	Negative	[M-H]-	804.518	7.09	(18:2_22:5;O)	Glycerophospholipids	level2
OxPE 44:7;O	Negative	[M-H]-	860.581	9.86	(22:4_22:3;O)	Glycerophospholipids	level2
PE 30:0	Negative	[M-H]-	662.477	7.44	(15:0_15:0)	Glycerophospholipids	level2
PE 32:0	Negative	[M-H]-	690.508	8.44	(16:0_16:0; 14:0_17:0)	Glycerophospholipids	level2
PE 32:1	Negative	[M-H]-	688.492	7.68	(16:0_16:1; 14:0_18:1)	Glycerophospholipids	level2
PE 32:2	Negative	[M-H]-	686.477	6.86	(16:1_16:1; 14:0_18:2)	Glycerophospholipids	level2
PE 33:0	Negative	[M-H]-	704.524	8.92	(16:0_17:0; 14:0_18:0)	Glycerophospholipids	level2
PE 33:1	Negative	[M-H]-	702.508	8.16	(15:0_18:1; 16:0_17:1)	Glycerophospholipids	level2
PE 34:0	Negative	[M-H]-	718.539	9.34	(16:0_18:0)	Glycerophospholipids	level2
PE 34:1	Negative	[M-H]-	716.524	8.65	(18:0_16:1; 18:1_16:0)	Glycerophospholipids	level2
PE 34:2	Negative	[M-H]-	714.508	7.89	(16:1_18:1; 16:0_18:2)	Glycerophospholipids	level2
PE 34:3	Negative	[M-H]-	712.492	7.09	(16:1_18:2)	Glycerophospholipids	level2
PE 34:4	Negative	[M-H]-	710.477	6.82	(14:0_20:4)	Glycerophospholipids	level2
PE 34:5	Negative	[M-H]-	708.461	6.02	(14:0_20:5)	Glycerophospholipids	level2
PE 35:1	Negative	[M-H]-	730.539	9.1	(17:0_18:1; 17:1_18:0)	Glycerophospholipids	level2
PE 35:2	Negative	[M-H]-	728.524	8.37	(17:1_18:1; 17:0_18:2)	Glycerophospholipids	level2
PE 35:3	Negative	[M-H]-	726.508	7.61	(17:1_18:2)	Glycerophospholipids	level2
PE 36:1	Negative	[M-H]-	744.555	9.55	(18:0_18:1; 16:0_20:1)	Glycerophospholipids	level2
PE 36:2	Negative	[M-H]-	742.539	8.86	(18:1_18:1; 18:0_18:2)	Glycerophospholipids	level2
PE 36:3-2peaks	Negative	[M-H]-	740.524	8.09	(18:1_18:2; 16:0_20:3)	Glycerophospholipids	level2
PE 36:4	Negative	[M-H]-	738.508	7.85	(16:0_20:4)	Glycerophospholipids	level2
PE 36:5-1	Negative	[M-H]-	736.492	7.13	(16:1_20:4; 16:0_20:5)	Glycerophospholipids	level2
PE 36:5-2	Negative	[M-H]-	736.492	7.47	(16:1_20:4)	Glycerophospholipids	level2
PE 37:1	Negative	[M-H]-	758.571	9.86	(18:0_19:1; 18:1_19:0)	Glycerophospholipids	level2
PE 37:2	Negative	[M-H]-	756.555	9.2	(18:1_19:1)	Glycerophospholipids	level2
PE 37:3-1	Negative	[M-H]-	754.539	8.65	(17:0_20:3; 18:1_19:2)	Glycerophospholipids	level2
PE 37:3-2	Negative	[M-H]-	754.539	9.03	(18:1_19:2)	Glycerophospholipids	level2
PE 37:4	Negative	[M-H]-	752.524	8.34	(17:0_20:4; 18:1_19:3)	Glycerophospholipids	level2
PE 37:5	Negative	[M-H]-	750.508	7.65	(17:1_20:4)	Glycerophospholipids	level2
PE 38:1	Negative	[M-H]-	772.586	10.34	(18:0_20:1; 18:1_20:0; 16:1_22:0)	Glycerophospholipids	level2
PE 38:2	Negative	[M-H]-	770.571	9.76	(18:0_20:2)	Glycerophospholipids	level2
PE 38:3	Negative	[M-H]-	768.555	9.13	(18:0_20:3)	Glycerophospholipids	level2
PE 38:4-1	Negative	[M-H]-	766.539	8.37	(18:1_20:3)	Glycerophospholipids	level2
PE 38:4-2	Negative	[M-H]-	766.539	8.82	(18:0_20:4)	Glycerophospholipids	level2
PE 38:5-3peaks	Negative	[M-H]-	764.524	8.16	(18:0_20:5)	Glycerophospholipids	level2
PE 38:6-2peaks	Negative	[M-H]-	762.508	7.54	(16:0_22:6; 18:1_20:5)	Glycerophospholipids	level2
PE 38:7	Negative	[M-H]-	760.492	6.72	(16:1_22:6)	Glycerophospholipids	level2
PE 39:3	Negative	[M-H]-	782.571	9.62	(18:0_21:3)	Glycerophospholipids	level2
PE 39:5	Negative	[M-H]-	778.539	8.47	(19:1_20:4)	Glycerophospholipids	level2
PE 39:6	Negative	[M-H]-	776.524	8.06	(17:0_22:6)	Glycerophospholipids	level2
PE 40:1-2peaks	Negative	[M-H]-	800.617	11.08	(22:0_18:1; 24:0_16:1)	Glycerophospholipids	level2
PE 40:2	Negative	[M-H]-	798.602	10.38	(18:1_22:1; 20:1_20:1; 16:1_24:1)	Glycerophospholipids	level2
PE 40:3	Negative	[M-H]-	796.586	10	(18:0_22:3; 20:0_20:3)	Glycerophospholipids	level2
PE 40:4-1	Negative	[M-H]-	794.571	9.41	(18:0_22:4)	Glycerophospholipids	level2
PE 40:4-2	Negative	[M-H]-	794.571	9.72	(20:0_20:4)	Glycerophospholipids	level2
PE 40:5	Negative	[M-H]-	792.555	8.79	(18:0_22:5; 18:1_22:4; 20:1_20:4)	Glycerophospholipids	level2
PE 40:6	Negative	[M-H]-	790.539	8.54	(18:0_22:6)	Glycerophospholipids	level2
PE 40:7	Negative	[M-H]-	788.524	7.75	(18:1_22:6)	Glycerophospholipids	level2
PE 40:8	Negative	[M-H]-	786.508	6.96	(18:2_22:6)	Glycerophospholipids	level2
PE 41:1	Negative	[M-H]-	814.633	11.46	(24:0_17:1; 23:0_18:1)	Glycerophospholipids	level2
PE 42:1	Negative	[M-H]-	828.649	11.74	(24:0_18:1)	Glycerophospholipids	level2
PE 42:2-1	Negative	[M-H]-	826.633	11.08	(18:1_24:1)	Glycerophospholipids	level2
PE 42:2-2	Negative	[M-H]-	826.633	11.28	(18:2_24:0)	Glycerophospholipids	level2
PE 42:4	Negative	[M-H]-	822.602	10.52	(22:0_20:4)	Glycerophospholipids	level2
PE 42:5-1	Negative	[M-H]-	820.586	9.44	(18:0_24:5)	Glycerophospholipids	level2
PE 42:5-2	Negative	[M-H]-	820.586	9.72	(18:0_24:5; 20:0_22:5)	Glycerophospholipids	level2
PE 42:6	Negative	[M-H]-	818.571	9.1	(18:0_24:6)	Glycerophospholipids	level2
PE 42:7	Negative	[M-H]-	816.555	8.61	(20:1_22:6)	Glycerophospholipids	level2
PE 44:2	Negative	[M-H]-	854.664	11.71	(18:1_26:1)	Glycerophospholipids	level2
PE 44:3	Negative	[M-H]-	852.649	11.42	(24:0_20:3)	Glycerophospholipids	level2
PE 44:4	Negative	[M-H]-	850.633	11.25	(24:0_20:4)	Glycerophospholipids	level2
PE 44:5-1	Negative	[M-H]-	848.617	10.48	(24:1_20:4)	Glycerophospholipids	level2
PE 44:5-2	Negative	[M-H]-	848.617	10.76	(24:0_20:5)	Glycerophospholipids	level2
PEtOH 32:1	Negative	[M-H]-	673.481	6.85	(16:0_16:1; 14:0_18:1)	Glycerophospholipids	level2
PEtOH 34:1	Negative	[M-H]-	701.513	7.82	(16:0_18:1)	Glycerophospholipids	level2
PEtOH 34:2	Negative	[M-H]-	699.497	7.06	(16:0_18:2; 16:1_18:1)	Glycerophospholipids	level2
PEtOH 36:1	Negative	[M-H]-	729.544	8.68	(18:0_18:1)	Glycerophospholipids	level2
PEtOH 36:2	Negative	[M-H]-	727.528	7.99	(18:1_18:1)	Glycerophospholipids	level2
PG 30:0	Negative	[M-H]-	693.471	5.99	(14:0_16:0)	Glycerophospholipids	level2
PG 31:0	Negative	[M-H]-	707.487	6.51	(15:0_16:0; 14:0_17:0)	Glycerophospholipids	level2
PG 32:0	Negative	[M-H]-	721.503	7.03	(16:0_16:0)	Glycerophospholipids	level2
PG 32:1	Negative	[M-H]-	719.487	6.23	(14:0_18:1; 16:0_16:1)	Glycerophospholipids	level2
PG 33:1	Negative	[M-H]-	733.503	6.69	(15:0_18:1; 16:0_17:1)	Glycerophospholipids	level2
PG 34:0	Negative	[M-H]-	749.534	7.96	(18:0_16:0)	Glycerophospholipids	level2
PG 34:1	Negative	[M-H]-	747.518	7.13	(16:0_18:1)	Glycerophospholipids	level2
PG 34:2	Negative	[M-H]-	745.503	6.48	(16:1_18:1; 16:0_18:2)	Glycerophospholipids	level2
PG 35:1	Negative	[M-H]-	761.534	7.61	(17:0_18:1; 16:0_19:1)	Glycerophospholipids	level2
PG 35:2	Negative	[M-H]-	759.518	6.92	(17:1_18:1)	Glycerophospholipids	level2
PG 36:1	Negative	[M-H]-	775.549	8.09	(18:0_18:1)	Glycerophospholipids	level2
PG 36:2	Negative	[M-H]-	773.534	7.4	(18:1_18:1)	Glycerophospholipids	level2
PG 36:3	Negative	[M-H]-	771.518	6.65	(18:1_18:2; 16:0_20:3)	Glycerophospholipids	level2
PG 36:4	Negative	[M-H]-	769.503	6.44	(16:0_20:4)	Glycerophospholipids	level2
PG 38:4	Negative	[M-H]-	797.534	7.44	(18:0_20:4)	Glycerophospholipids	level2
PG 38:5	Negative	[M-H]-	795.518	5.78	(16:0_22:5; 18:1_20:4)	Glycerophospholipids	level2
PG 38:6	Negative	[M-H]-	793.503	5.48	(16:0_22:6)	Glycerophospholipids	level2
PG 38:7	Negative	[M-H]-	791.487	4.68	(16:1_22:6)	Glycerophospholipids	level2
PG 39:7	Negative	[M-H]-	805.503	5.22	(17:1_22:6)	Glycerophospholipids	level2
PG 40:6	Negative	[M-H]-	821.533	6.51	(18:0_22:6)	Glycerophospholipids	level2
PG 40:7	Negative	[M-H]-	819.518	5.75	(18:1_22:6)	Glycerophospholipids	level2
PG 40:8	Negative	[M-H]-	817.503	4.98	(18:2_22:6)	Glycerophospholipids	level2
PG 42:10-1	Negative	[M-H]-	841.503	4.58	(20:4_22:6)	Glycerophospholipids	level2
PG 42:10-2	Negative	[M-H]-	841.503	4.94	(20:4_22:6)	Glycerophospholipids	level2
PG 42:9-1	Negative	[M-H]-	843.518	5.31	(20:3_22:6)	Glycerophospholipids	level2
PG 42:9-2	Negative	[M-H]-	843.518	5.75	(20:4_22:5)	Glycerophospholipids	level2
PG 44:10	Negative	[M-H]-	869.534	5.75	(22:4_22:6)	Glycerophospholipids	level2
PG 44:11	Negative	[M-H]-	867.518	4.94	(22:5_22:6)	Glycerophospholipids	level2
PG 44:12	Negative	[M-H]-	865.503	4.62	(22:6_22:6)	Glycerophospholipids	level2
PI 32:1	Negative	[M-H]-	807.502	5.99	(16:0_16:1; 15:0_17:1; 14:0_18:1)	Glycerophospholipids	level2
PI 34:1	Negative	[M-H]-	835.534	6.99	(16:0_18:1; 16:1_18:0; 15:0_19:1)	Glycerophospholipids	level2
PI 34:2	Negative	[M-H]-	833.518	6.23	(16:1_18:1; 16:0_18:2; 15:0_19:2)	Glycerophospholipids	level2
PI 35:1	Negative	[M-H]-	849.55	7.47	(17:0_18:1; 17:1_18:0)	Glycerophospholipids	level2
PI 35:2	Negative	[M-H]-	847.534	6.75	(17:1_18:1; 15:1_20:1)	Glycerophospholipids	level2
PI 36:1	Negative	[M-H]-	863.565	7.96	(18:0_18:1)	Glycerophospholipids	level2
PI 36:2	Negative	[M-H]-	861.55	7.2	(18:1_18:1)	Glycerophospholipids	level2
PI 36:3-1	Negative	[M-H]-	859.534	6.51	(18:1_18:2)	Glycerophospholipids	level2
PI 36:3-2	Negative	[M-H]-	859.534	6.92	(16:0_20:3)	Glycerophospholipids	level2
PI 36:4	Negative	[M-H]-	857.519	6.16	(16:0_20:4)	Glycerophospholipids	level2
PI 36:5	Negative	[M-H]-	855.503	5.48	(16:0_20:5)	Glycerophospholipids	level2
PI 37:1	Negative	[M-H]-	877.581	8.3	(18:0_19:1; 18:1_19:0)	Glycerophospholipids	level2
PI 37:2-2peaks	Negative	[M-H]-	875.565	7.75	(18:1_19:1; 18:0_19:2; 17:0_20:2)	Glycerophospholipids	level2
PI 37:3-1	Negative	[M-H]-	873.55	7.03	(17:0_20:3; 18:1_19:2)	Glycerophospholipids	level2
PI 37:3-2	Negative	[M-H]-	873.55	7.44	(18:0_19:3)	Glycerophospholipids	level2
PI 37:4	Negative	[M-H]-	871.534	6.72	(17:0_20:4)	Glycerophospholipids	level2
PI 38:1	Negative	[M-H]-	891.597	8.72	(18:0_20:1)	Glycerophospholipids	level2
PI 38:2-2peaks	Negative	[M-H]-	889.581	8.2	(18:0_20:2; 18:1_20:1)	Glycerophospholipids	level2
PI 38:3-1	Negative	[M-H]-	887.565	7.54	(18:0_20:3; 18:1_20:2)	Glycerophospholipids	level2
PI 38:3-2	Negative	[M-H]-	887.565	7.89	(18:0_20:3)	Glycerophospholipids	level2
PI 38:4; 2O-1	Negative	[M-H]-	917.54	4.8	(18:0_20:4; 2O)	Glycerophospholipids	level2
PI 38:4; 2O-2	Negative	[M-H]-	917.54	5.55	(18:0_20:4; 2O)	Glycerophospholipids	level2
PI 38:4-1	Negative	[M-H]-	885.55	6.75	(18:1_20:3)	Glycerophospholipids	level2
PI 38:4-2	Negative	[M-H]-	885.55	7.23	(18:0_20:4)	Glycerophospholipids	level2
PI 38:5	Negative	[M-H]-	883.534	6.37	(18:1_20:4; 18:0_20:5; 16:0_22:5; )	Glycerophospholipids	level2
PI 38:6	Negative	[M-H]-	881.519	5.75	(18:1_20:5)	Glycerophospholipids	level2
PI 39:3	Negative	[M-H]-	901.581	8.06	(18:0_21:3)	Glycerophospholipids	level2
PI 39:4-1	Negative	[M-H]-	899.565	7.34	(18:1_21:3)	Glycerophospholipids	level2
PI 39:4-2	Negative	[M-H]-	899.565	7.58	(19:0_20:4; 19:1_20:3)	Glycerophospholipids	level2
PI 39:5	Negative	[M-H]-	897.55	6.85	(19:1_20:4; 17:0_22:5)	Glycerophospholipids	level2
PI 39:6	Negative	[M-H]-	895.534	6.44	(17:0_22:6)	Glycerophospholipids	level2
PI 40:2	Negative	[M-H]-	917.612	8.86	(18:0_22:2; 18:1_22:1)	Glycerophospholipids	level2
PI 40:3	Negative	[M-H]-	915.597	8.51	(18:0_22:3)	Glycerophospholipids	level2
PI 40:4	Negative	[M-H]-	913.581	7.82	(18:0_22:4)	Glycerophospholipids	level2
PI 40:5-2peaks	Negative	[M-H]-	911.565	7.16	(18:0_22:5)	Glycerophospholipids	level2
PI 40:6	Negative	[M-H]-	909.55	6.92	(18:0_22:6)	Glycerophospholipids	level2
PI 40:7	Negative	[M-H]-	907.534	6.09	(18:1_22:6; 20:3_20:4)	Glycerophospholipids	level2
PI 40:8-2peaks	Negative	[M-H]-	905.519	5.48	(20:4_20:4)	Glycerophospholipids	level2
PI 41:7	Negative	[M-H]-	921.55	6.58	(19:1_22:6)	Glycerophospholipids	level2
PI 42:6	Negative	[M-H]-	937.581	7.54	(18:0_24:6)	Glycerophospholipids	level2
PI 42:7-1	Negative	[M-H]-	935.565	6.75	(18:1_24:6)	Glycerophospholipids	level2
PI 42:7-2	Negative	[M-H]-	935.565	7.06	(20:1_22:6)	Glycerophospholipids	level2
PI 42:9	Negative	[M-H]-	931.534	5.55	(20:4_22:5)	Glycerophospholipids	level2
PI O-34:1	Negative	[M-H]-	821.555	7.47	(O-18:1_16:0)	Glycerophospholipids	level2
PI O-36:1	Negative	[M-H]-	849.586	8.47	(O-18:0_18:1)	Glycerophospholipids	level2
PI O-36:2	Negative	[M-H]-	847.571	7.67	(O-18:1_18:1)	Glycerophospholipids	level2
PI O-36:4	Negative	[M-H]-	843.539	6.75	(O-16:0_20:4)	Glycerophospholipids	level2
PI O-38:3	Negative	[M-H]-	873.586	8.03	(O-18:0_20:3)	Glycerophospholipids	level2
PI O-38:4	Negative	[M-H]-	871.571	7.75	(O-18:0_20:4)	Glycerophospholipids	level2
PI O-38:5-all	Negative	[M-H]-	869.555	6.89	(O-18:1_20:4; O-16:0_22:5; O-18:0_20:5)	Glycerophospholipids	level2
PI O-38:6	Negative	[M-H]-	867.539	6.44	(O-16:0_22:6)	Glycerophospholipids	level2
PI O-40:4	Negative	[M-H]-	899.602	8.34	(O-18:0_22:4)	Glycerophospholipids	level2
PI O-40:5	Negative	[M-H]-	897.586	7.72	(O-18:0_22:5)	Glycerophospholipids	level2
PI O-40:6	Negative	[M-H]-	895.571	7.44	(O-18:0_22:6)	Glycerophospholipids	level2
PI O-40:7	Negative	[M-H]-	893.555	6.58	(O-18:1_22:6)	Glycerophospholipids	level2
PI O-42:6	Negative	[M-H]-	923.602	8.03	(O-18:0_24:6)	Glycerophospholipids	level2
PS 32:1	Negative	[M-H]-	732.482	6.27	(16:0_16:1)	Glycerophospholipids	level2
PS 34:1	Negative	[M-H]-	760.513	7.06	(16:0_18:1; 16:1_18:0)	Glycerophospholipids	level2
PS 34:2	Negative	[M-H]-	758.498	6.3	(16:0_18:2; 16:1_18:1)	Glycerophospholipids	level2
PS 35:1	Negative	[M-H]-	774.529	7.61	(17:0_18:1; 17:1_18:0)	Glycerophospholipids	level2
PS 36:1	Negative	[M-H]-	788.545	8.03	(18:0_18:1)	Glycerophospholipids	level2
PS 36:2	Negative	[M-H]-	786.529	7.3	(18:0_18:2; 18:1_18:1)	Glycerophospholipids	level2
PS 36:3	Negative	[M-H]-	784.513	6.58	(16:0_20:3; 18:1_18:2; 18:0_18:3)	Glycerophospholipids	level2
PS 36:4	Negative	[M-H]-	782.497	6.27	(16:0_20:4)	Glycerophospholipids	level2
PS 37:2	Negative	[M-H]-	800.544	7.4	(18:1_19:1)	Glycerophospholipids	level2
PS 38:2	Negative	[M-H]-	814.56	8.27	(18:1_20:1)	Glycerophospholipids	level2
PS 38:3	Negative	[M-H]-	812.545	7.61	(18:0_20:3)	Glycerophospholipids	level2
PS 38:4-1	Negative	[M-H]-	810.529	6.92	(18:0_20:4; 18:1_20:3)	Glycerophospholipids	level2
PS 38:4-2	Negative	[M-H]-	810.529	7.3	(18:0_20:4)	Glycerophospholipids	level2
PS 38:5-2peaks	Negative	[M-H]-	808.513	6.58	(18:0_20:5; 16:0_22:5; 18:1_20:4)	Glycerophospholipids	level2
PS 38:6	Negative	[M-H]-	806.498	5.99	(16:0_22:6)	Glycerophospholipids	level2
PS 39:5	Negative	[M-H]-	822.529	6.75	(17:0_22:5)	Glycerophospholipids	level2
PS 40:4	Negative	[M-H]-	838.56	7.89	(18:0_22:4)	Glycerophospholipids	level2
PS 40:5	Negative	[M-H]-	836.544	7.3	(18:0_22:5)	Glycerophospholipids	level2
PS 40:6	Negative	[M-H]-	834.529	7.03	(18:0_22:6)	Glycerophospholipids	level2
PS 40:7	Negative	[M-H]-	832.513	6.17	—	Glycerophospholipids	level2
PS 42:1	Negative	[M-H]-	872.639	10.48	(18:1_24:0)	Glycerophospholipids	level2
PS 42:6	Negative	[M-H]-	862.56	7.61	(18:0_24:6)	Glycerophospholipids	level2
ST 27:1; O; S	Negative	[M-H]-	465.304	2.33	—	Sterol Lipids	level2
13-Docosenamide	Positive	[M+H]+	338.342	4.38	—	—	level2
ASM 52:2; 3O	Positive	[M+H]+	969.836	12.84	(34:1;2O (FA18:0))	Sphingolipids	level2
ASM 77:14; 2O	Positive	[M+H]+	1294.02	4.94	—	Sphingolipids	level2
BMP 40:7	Positive	[M+NH4]+	838.559	5.74	(18:1_22:6)	Glycerophospholipids	level2
BMP 44:11	Positive	[M+NH4]+	886.559	4.97	(22:5_22:6)	Glycerophospholipids	level2
BMP 44:12	Positive	[M+NH4]+	884.544	4.66	(22:6_22:6)	Glycerophospholipids	level2
CAR 14:0	Positive	[M+H]+	372.311	1.48	(14:0)	Fatty acyls	level2
CAR 16:0	Positive	[M+H]+	400.342	1.69	(16:0)	Fatty acyls	level2
CAR 16:1	Positive	[M+H]+	398.327	1.55	(16:1)	Fatty acyls	level2
CAR 17:0	Positive	[M+H]+	414.358	1.86	(17:0)	Fatty acyls	level2
CAR 18:0	Positive	[M+H]+	428.373	2.17	(18:0)	Fatty acyls	level2
CAR 18:1	Positive	[M+H]+	426.358	1.82	(18:1)	Fatty acyls	level2
CAR 20:0	Positive	[M+H]+	456.405	2.79	(20:0)	Fatty acyls	level2
CAR 20:1	Positive	[M+H]+	454.389	2.27	(20:1)	Fatty acyls	level2
CAR 24:0	Positive	[M+H]+	512.467	5.04	(24:0)	Fatty acyls	level2
CAR 24:1	Positive	[M+H]+	510.452	3.93	(24:1)	Fatty acyls	level2
CE 18:1	Positive	[M+NH4]+	668.634	13.95	(18:1)	Sterol Lipids	level2
CE 18:2	Positive	[M+NH4]+	666.618	13.54	(18:2)	Sterol Lipids	level2
CE 20:4	Positive	[M+NH4]+	690.618	13.26	(20:4)	Sterol Lipids	level2
CE 22:5	Positive	[M+NH4]+	716.634	13.29	(22:5)	Sterol Lipids	level2
CE 22:6	Positive	[M+NH4]+	714.618	12.98	(22:6)	Sterol Lipids	level2
CE 24:6	Positive	[M+NH4]+	742.65	13.4	(24:6)	Sterol Lipids	level2
CE 26:6	Positive	[M+NH4]+	770.681	13.81	(26:6)	Sterol Lipids	level2
Cer 28:0; 2O	Positive	[M+H]+	456.441	7.22	(12:0;2O_16:0)	Sphingolipids	level2
Cer 34:0; 2O	Positive	[M+H]+	540.535	8.71	(18:0;2O_16:0)	Sphingolipids	level2
Cer 34:0; 3O	Positive	M+H-2H2O	520.509	8.43	(18:0;3O_16:0)	Sphingolipids	level2
Cer 34:0; O	Positive	[M+H]+	524.54	9.22	(18:0;O_16:0)	Sphingolipids	level2
Cer 34:1; 2O	Positive	[M+H]+	538.519	8.43	(18:1;2O_16:0)	Sphingolipids	level2
Cer 35:0; 2O	Positive	[M+H]+	554.551	9.19	(18:0;2O_17:0)	Sphingolipids	level2
Cer 35:0; 3O	Positive	M+H-2H2O	534.524	8.91	(18:0;3O_17:0)	Sphingolipids	level2
Cer 35:1; 2O	Positive	[M+H]+	552.535	8.91	(18:1;2O_17:0)	Sphingolipids	level2
Cer 36:0; 2O	Positive	[M+H]+	568.566	9.64	(18:0;2O_18:0)	Sphingolipids	level2
Cer 36:0; 3O	Positive	M+H-2H2O	548.54	9.36	(18:0;3O_18:0)	Sphingolipids	level2
Cer 36:0; O	Positive	[M+H]+	552.571	10.09	(18:0;O_18:0)	Sphingolipids	level2
Cer 36:1; 2O	Positive	[M+H]+	566.551	9.36	(18:1;2O_18:0)	Sphingolipids	level2
Cer 38:0; 2O	Positive	[M+H]+	596.598	10.46	(18:0;2O_20:0)	Sphingolipids	level2
Cer 38:0; 3O	Positive	M+H-2H2O	576.571	10.22	(18:0;3O_20:0)	Sphingolipids	level2
Cer 38:0; O	Positive	[M+H]+	580.603	10.85	(18:0;O_20:0)	Sphingolipids	level2
Cer 38:1; 2O	Positive	[M+H]+	594.582	10.22	(18:1;2O_20:0)	Sphingolipids	level2
Cer 38:2; 2O	Positive	[M+H]+	592.567	9.57	(18:2;2O_20:0)	Sphingolipids	level2
Cer 39:0; 3O	Positive	M+H-2H2O	590.587	10.67	(17:0;3O_22:0)	Sphingolipids	level2
Cer 39:1; 2O	Positive	[M+H]+	608.598	10.67	(17:1;2O_22:0)	Sphingolipids	level2
Cer 40:0; 2O	Positive	[M+H]+	624.629	11.23	(18:0;2O_22:0)	Sphingolipids	level2
Cer 40:0; O	Positive	[M+H]+	608.634	11.58	(18:0;O_22:0)	Sphingolipids	level2
Cer 40:1; 2O	Positive	[M+H]+	622.613	11.02	(18:1;2O_22:0)	Sphingolipids	level2
Cer 40:2; 2O	Positive	[M+H]+	620.598	10.43	(18:2;2O_22:0)	Sphingolipids	level2
Cer 41:0; 2O	Positive	[M+H]+	638.645	11.54	(18:0;2O_23:0)	Sphingolipids	level2
Cer 41:0; 3O	Positive	M+H-2H2O	618.618	11.37	(18:0;3O_23:0)	Sphingolipids	level2
Cer 41:0; O	Positive	[M+H]+	622.65	11.89	(18:0;O_23:0)	Sphingolipids	level2
Cer 41:1; 2O	Positive	[M+H]+	636.629	11.37	(18:1;2O_23:0)	Sphingolipids	level2
Cer 41:2; 2O	Positive	[M+H]+	634.613	10.67	(18:1;2O_23:1)	Sphingolipids	level2
Cer 42:0; 2O	Positive	[M+H]+	652.66	11.89	(18:0;2O_24:0)	Sphingolipids	level2
Cer 42:0; O	Positive	[M+H]+	636.665	12.17	(18:0;O_24:0)	Sphingolipids	level2
Cer 42:1; 2O	Positive	[M+H]+	650.645	11.72	(18:1;2O_24:0)	Sphingolipids	level2
Cer 42:1; O	Positive	[M+H]+	634.65	11.89	(18:1;O_24:0)	Sphingolipids	level2
Cer 42:2; 2O-1	Positive	[M+H]+	648.629	11.02	(18:1;2O_24:1)	Sphingolipids	level2
Cer 42:2; 2O-2	Positive	[M+H]+	648.629	11.19	(18:2;2O_24:0)	Sphingolipids	level2
Cer 42:3; 2O	Positive	[M+H]+	646.613	10.43	(18:2;2O_24:1)	Sphingolipids	level2
Cer 43:0; 2O	Positive	[M+H]+	666.676	12.17	(18:0;2O_25:0)	Sphingolipids	level2
Cer 43:0; O	Positive	[M+H]+	650.681	12.45	(18:0;O_25:0)	Sphingolipids	level2
Cer 43:1; 2O	Positive	[M+H]+	664.66	12.03	(18:1;2O_25:0)	Sphingolipids	level2
Cer 43:2; 2O	Positive	[M+H]+	662.645	11.37	(18:1;2O_25:1)	Sphingolipids	level2
Cer 44:0; 2O	Positive	[M+H]+	680.692	12.45	(18:1;2O_26:0)	Sphingolipids	level2
Cer 44:0; O	Positive	[M+H]+	664.697	12.73	(18:0;O_26:0)	Sphingolipids	level2
Cer 44:1; 2O	Positive	[M+H]+	678.676	12.31	(18:1;2O_26:0)	Sphingolipids	level2
Cer 44:2; 2O	Positive	[M+H]+	676.66	11.68	(18:1;2O_26:1)	Sphingolipids	level2
CoQ10	Positive	[M+H]+	863.691	12.84	Q10	Prenol Lipids	level2
CoQ9	Positive	[M+H]+	795.629	11.99	Q9	Prenol Lipids	level2
DG 32:0	Positive	[M+NH4]+	586.541	9.9	—	Glycerolipids	level2
DG 34:0	Positive	[M+NH4]+	614.572	10.67	(16:0_18:0)	Glycerolipids	level2
DG 34:1	Positive	[M+NH4]+	612.556	10.05	(16:0_18:1)	Glycerolipids	level2
DG 36:0	Positive	[M+NH4]+	642.603	11.33	—	Glycerolipids	level2
DG 36:1	Positive	[M+NH4]+	640.588	10.81	(18:0_18:1)	Glycerolipids	level2
DG 36:2	Positive	[M+NH4]+	638.572	10.19	(18:1_18:1)	Glycerolipids	level2
DG 36:3	Positive	[M+NH4]+	636.557	9.6	—	Glycerolipids	level2
DG 38:3	Positive	[M+NH4]+	664.588	10.43	(18:0_20:3)	Glycerolipids	level2
DG 38:4	Positive	[M+NH4]+	662.572	10.15	(18:0_20:4)	Glycerolipids	level2
DG 40:5	Positive	[M+NH4]+	688.588	10.12	(18:0_22:5)	Glycerolipids	level2
DG 40:6	Positive	[M+NH4]+	686.572	9.88	(18:0_22:6)	Glycerolipids	level2
DG 42:1-2peaks	Positive	[M+NH4]+	724.681	12.66	(24:0_18:1)	Glycerolipids	level2
DG O-40:1	Positive	[M+NH4]+	682.671	12.56	(O-24:1_16:0)	Glycerolipids	level2
DG O-42:1	Positive	[M+NH4]+	710.702	13.05	(O-24:1_18:0)	Glycerolipids	level2
Elaidylphosphocholine	Positive	[M+H]+	434.339	1.89	—	Others	level2
HexCer 34:0; 2O	Positive	[M+H]+	702.588	7.95	(18:0;2O_16:0)	Sphingolipids	level2
HexCer 34:1; 2O	Positive	[M+H]+	700.572	7.6	(18:1;2O_16:0)	Sphingolipids	level2
HexCer 36:0; 2O	Positive	[M+H]+	730.619	8.91	(18:0;2O_18:0)	Sphingolipids	level2
HexCer 36:1; 2O	Positive	[M+H]+	728.604	8.6	(18:1;2O_18:0)	Sphingolipids	level2
HexCer 38:0; 2O	Positive	[M+H]+	758.65	9.81	(18:0;2O_20:0)	Sphingolipids	level2
HexCer 38:1; 2O	Positive	[M+H]+	756.635	9.53	(18:1;2O_20:0)	Sphingolipids	level2
HexCer 40:0; 2O	Positive	[M+H]+	786.682	10.64	(18:0;2O_22:0)	Sphingolipids	level2
HexCer 40:1; 2O	Positive	[M+H]+	784.666	10.4	(18:1;2O_22:0)	Sphingolipids	level2
HexCer 40:2; 3O	Positive	[M+H-H2O]+	780.635	9.81	(20:0;2O_20:2;O)	Sphingolipids	level2
HexCer 41:0; 2O	Positive	[M+H]+	800.697	11.02	(18:0;2O_23:0)	Sphingolipids	level2
HexCer 41:1; 2O	Positive	[M+H]+	798.682	10.81	(18:1;2O_23:0)	Sphingolipids	level2
HexCer 42:1; 2O	Positive	[M+H]+	812.697	11.16	(18:1;2O_24:0)	Sphingolipids	level2
HexCer 42:2; 2O-1	Positive	[M+H]+	810.682	10.4	(18:1;2O_24:1)	Sphingolipids	level2
HexCer 42:2; 2O-2	Positive	[M+H]+	810.682	10.6	(18:2;2O_24:0)	Sphingolipids	level2
HexCer 43:1; 2O	Positive	[M+H]+	826.713	11.51	(18:1;2O_25:0)	Sphingolipids	level2
HexCer 44:0; 2O	Positive	[M+H]+	842.744	11.99	(18:0;2O_26:0)	Sphingolipids	level2
HexCer 44:0; 3O	Positive	[M+H-H2O]+	840.729	11.3	(18:0;2O_26:0;O)	Sphingolipids	level2
HexCer 44:1; 2O	Positive	[M+H]+	840.729	11.82	(18:1;2O_26:0)	Sphingolipids	level2
HexCer 44:2; 2O	Positive	[M+H]+	838.713	11.09	(18:1;2O_26:1)	Sphingolipids	level2
LPC 14:0	Positive	[M+H]+	468.308	1.48	(14:0)	Glycerophospholipids	level2
LPC 16:0	Positive	[M+H]+	496.34	1.76	(16:0)	Glycerophospholipids	level2
LPC 16:1	Positive	[M+H]+	494.324	1.55	(16:1)	Glycerophospholipids	level2
LPC 17:0	Positive	[M+H]+	510.355	2.03	(17:0)	Glycerophospholipids	level2
LPC 17:1	Positive	[M+H]+	508.34	1.69	(17:1)	Glycerophospholipids	level2
LPC 18:0	Positive	[M+H]+	524.371	2.24	(18:0)	Glycerophospholipids	level2
LPC 18:1	Positive	[M+H]+	522.355	1.86	(18:1)	Glycerophospholipids	level2
LPC 18:2	Positive	[M+H]+	520.34	1.59	(18:2)	Glycerophospholipids	level2
LPC 19:0	Positive	[M+H]+	538.387	2.59	(19:0)	Glycerophospholipids	level2
LPC 19:1	Positive	[M+H]+	536.371	2.07	(19:1)	Glycerophospholipids	level2
LPC 20:0	Positive	[M+H]+	552.402	2.97	(20:0)	Glycerophospholipids	level2
LPC 20:1	Positive	[M+H]+	550.387	2.34	(20:1)	Glycerophospholipids	level2
LPC 20:3	Positive	[M+H]+	546.355	1.69	(20:3)	Glycerophospholipids	level2
LPC 20:4	Positive	[M+H]+	544.34	1.55	(20:4)	Glycerophospholipids	level2
LPC 20:5	Positive	[M+H]+	542.324	1.41	(20:5)	Glycerophospholipids	level2
LPC 21:0	Positive	[M+H]+	566.418	3.45	(21:0)	Glycerophospholipids	level2
LPC 22:0	Positive	[M+H]+	580.434	4.1	(22:0)	Glycerophospholipids	level2
LPC 22:1	Positive	[M+H]+	578.418	3.04	(22:1)	Glycerophospholipids	level2
LPC 22:5	Positive	[M+H]+	570.355	1.62	(22:5)	Glycerophospholipids	level2
LPC 22:6	Positive	[M+H]+	568.34	1.55	(22:6)	Glycerophospholipids	level2
LPC 24:0	Positive	[M+H]+	608.465	5.32	(24:0)	Glycerophospholipids	level2
LPC 24:1	Positive	[M+H]+	606.449	4.14	(24:1)	Glycerophospholipids	level2
LPC 26:0	Positive	[M+H]+	636.496	5.66	(26:0)	Glycerophospholipids	level2
LPC 26:1	Positive	[M+H]+	634.481	5.32	(26:1)	Glycerophospholipids	level2
LPC O-15:1	Positive	[M+H]+	466.329	1.65	(O-15:1)	Glycerophospholipids	level2
LPC O-16:0	Positive	[M+H]+	482.361	1.96	(O-16:0)	Glycerophospholipids	level2
LPC O-18:0	Positive	[M+H]+	510.392	2.55	(O-18:0)	Glycerophospholipids	level2
LPC O-18:1-1	Positive	[M+H]+	508.376	2.13	(O-18:1)	Glycerophospholipids	level2
LPC O-18:1-2	Positive	[M+H]+	508.376	2.48	—	Glycerophospholipids	level2
LPC O-18:2	Positive	[M+H]+	506.361	2.03	(O-18:2)	Glycerophospholipids	level2
LPC O-20:0	Positive	[M+H]+	538.423	3.42	(O-20:0)	Glycerophospholipids	level2
LPC O-22:0	Positive	[M+H]+	566.454	4.62	(O-22:0)	Glycerophospholipids	level2
LPC O-24:0	Positive	[M+H]+	594.486	5.91	(O-24:0)	Glycerophospholipids	level2
LPC O-24:1	Positive	[M+H]+	592.47	4.69	(O-24:1)	Glycerophospholipids	level2
LPE O-16:1	Positive	[M+H]+	438.298	2	(O-16:1)	Glycerophospholipids	level2
LPE O-18:1	Positive	[M+H]+	466.329	2.62	(O-18:1)	Glycerophospholipids	level2
LPE O-18:2	Positive	[M+H]+	464.314	2.1	(O-18:2)	Glycerophospholipids	level2
LPE O-19:1	Positive	[M+H]+	480.345	2.97	(O-19:1)	Glycerophospholipids	level2
LPE O-20:1	Positive	[M+H]+	494.361	3.49	(O-20:1)	Glycerophospholipids	level2
NAE 14:0	Positive	[M+H]+	272.258	2.03	(14:0)	Fatty acyls	level2
NAE 20:2	Positive	[M+H]+	352.321	2	(20:2)	Fatty acyls	level2
NAE 23:1	Positive	[M+H]+	396.384	3.42	(23:1)	Fatty acyls	level2
NAE 25:1	Positive	[M+H]+	424.415	4.62	(25:1)	Fatty acyls	level2
NAE 28:6	Positive	[M+H]+	456.384	4.45	(28:6)	Fatty acyls	level2
NAE 28:7	Positive	[M+H]+	454.368	3.49	(28:7)	Fatty acyls	level2
NAE 9:0	Positive	[M+H]+	202.18	1.07	(9:0)	Fatty acyls	level2
PC 26:0	Positive	[M+H]+	650.476	5.01	—	Glycerophospholipids	level2
PC 28:0	Positive	[M+H]+	678.507	6.12	(14:0_14:0)	Glycerophospholipids	level2
PC 28:1	Positive	[M+H]+	676.491	5.67	—	Glycerophospholipids	level2
PC 29:0	Positive	[M+H]+	692.523	6.67	(15:0_14:0)	Glycerophospholipids	level2
PC 29:1	Positive	[M+H]+	690.507	5.77	—	Glycerophospholipids	level2
PC 30:0	Positive	[M+H]+	706.538	7.18	(15:0_15:0; 14:0_16:0)	Glycerophospholipids	level2
PC 30:1	Positive	[M+H]+	704.523	6.49	(16:1_14:0)	Glycerophospholipids	level2
PC 30:2	Positive	[M+H]+	702.507	5.67	—	Glycerophospholipids	level2
PC 31:0	Positive	[M+H]+	720.554	7.7	(15:0_16:0)	Glycerophospholipids	level2
PC 31:1	Positive	[M+H]+	718.538	6.91	(15:0_16:1; 14:0_17:1)	Glycerophospholipids	level2
PC 32:0	Positive	[M+H]+	734.569	8.19	(16:0_16:0; 14:0_18:0)	Glycerophospholipids	level2
PC 32:1	Positive	[M+H]+	732.554	7.43	(16:0_16:1; 14:0_18:1)	Glycerophospholipids	level2
PC 32:2	Positive	[M+H]+	730.538	6.6	(16:1_16:1; 14:0_18:2)	Glycerophospholipids	level2
PC 32:3	Positive	[M+H]+	728.523	5.77	—	Glycerophospholipids	level2
PC 32:4	Positive	[M+H]+	726.507	5.74	—	Glycerophospholipids	level2
PC 33:0	Positive	[M+H]+	748.585	8.67	(16:0_17:0; 15:0_18:0)	Glycerophospholipids	level2
PC 33:1	Positive	[M+H]+	746.569	7.91	(16:0_17:1; 15:0_18:1)	Glycerophospholipids	level2
PC 33:2	Positive	[M+H]+	744.554	7.15	(16:1_17:1; 15:0_18:2)	Glycerophospholipids	level2
PC 34:0	Positive	[M+H]+	762.601	9.12	(16:0_18:0; 14:0_20:0)	Glycerophospholipids	level2
PC 34:1	Positive	[M+H]+	760.585	8.39	(16:0_18:1)	Glycerophospholipids	level2
PC 34:2	Positive	[M+H]+	758.569	7.63	(16:1_18:1; 16:0_18:2)	Glycerophospholipids	level2
PC 34:3-2peaks	Positive	[M+H]+	756.554	6.94	(16:0_18:3; 16:1_18:2; 14:0_20:3)	Glycerophospholipids	level2
PC 34:4-2peaks	Positive	[M+H]+	754.538	6.56	(14:0_20:4)	Glycerophospholipids	level2
PC 34:5	Positive	[M+H]+	752.523	5.77	—	Glycerophospholipids	level2
PC 35:0	Positive	[M+H]+	776.616	9.43	(17:0_18:0)	Glycerophospholipids	level2
PC 35:1	Positive	[M+H]+	774.601	8.88	(17:0_18:1; 17:1_18:0)	Glycerophospholipids	level2
PC 35:2	Positive	[M+H]+	772.585	8.12	(17:1_18:1; 16:1_19:1)	Glycerophospholipids	level2
PC 35:3	Positive	[M+H]+	770.569	7.36	(17:1_18:2; 15:0_20:3)	Glycerophospholipids	level2
PC 35:4	Positive	[M+H]+	768.554	7.08	(15:0_20:4)	Glycerophospholipids	level2
PC 35:5	Positive	[M+H]+	766.539	6.36	—	Glycerophospholipids	level2
PC 35:6	Positive	[M+H]+	764.523	5.77	—	Glycerophospholipids	level2
PC 36:0	Positive	[M+H]+	790.632	9.95	(18:0_18:0; 16:0_20:0)	Glycerophospholipids	level2
PC 36:1	Positive	[M+H]+	788.616	9.33	(18:0_18:1)	Glycerophospholipids	level2
PC 36:2	Positive	[M+H]+	786.601	8.6	(18:1_18:1; 18:0_18:2)	Glycerophospholipids	level2
PC 36:3	Positive	[M+H]+	784.585	7.95	(16:0_20:3; 18:1_18:2)	Glycerophospholipids	level2
PC 36:4-1	Positive	[M+H]+	782.569	7.25	(16:0_20:4; 16:1_20:3; 18:1_18:3)	Glycerophospholipids	level2
PC 36:4-2	Positive	[M+H]+	782.569	7.6	(16:0_20:4; 18:2_18:2)	Glycerophospholipids	level2
PC 36:5-2peaks	Positive	[M+H]+	780.554	6.91	(16:1_20:4; 16:0_20:5)	Glycerophospholipids	level2
PC 36:6	Positive	[M+H]+	778.538	6.22	—	Glycerophospholipids	level2
PC 36:7	Positive	[M+H]+	776.523	5.74	—	Glycerophospholipids	level2
PC 37:0	Positive	[M+H]+	804.648	10.33	—	Glycerophospholipids	level2
PC 37:1	Positive	[M+H]+	802.632	9.64	(17:0_20:1; 18:0_19:1; 18:1_19:0; 16:0_21:1)	Glycerophospholipids	level2
PC 37:2	Positive	[M+H]+	800.616	8.98	(18:1_19:1; 18:0_19:2; 18:2_19:0; 17:0_20:2)	Glycerophospholipids	level2
PC 37:3	Positive	[M+H]+	798.601	8.43	(19:1_18:2; 19:2_18:1; 17:0_20:3)	Glycerophospholipids	level2
PC 37:4-1	Positive	[M+H]+	796.585	7.67	(17:0_20:4; 17:1_20:3; 18:1_19:3)	Glycerophospholipids	level2
PC 37:4-2	Positive	[M+H]+	796.585	8.12	—	Glycerophospholipids	level2
PC 37:5-all	Positive	[M+H]+	794.569	7.29	—	Glycerophospholipids	level2
PC 37:6	Positive	[M+H]+	792.554	6.77	—	Glycerophospholipids	level2
PC 38:0	Positive	[M+H]+	818.663	10.67	(19:0_19:0)	Glycerophospholipids	level2
PC 38:1-1	Positive	[M+H]+	816.648	10.02	(16:0_22:1; 18:0_20:1; 18:1_20:0)	Glycerophospholipids	level2
PC 38:1-2	Positive	[M+H]+	816.648	10.15	—	Glycerophospholipids	level2
PC 38:2	Positive	[M+H]+	814.632	9.4	(18:1_20:1; 18:0_20:2)	Glycerophospholipids	level2
PC 38:3	Positive	[M+H]+	812.616	8.88	(18:0_20:3)	Glycerophospholipids	level2
PC 38:4	Positive	[M+H]+	810.601	8.6	(18:0_20:4; 18:1_20:3)	Glycerophospholipids	level2
PC 38:5-2peaks	Positive	[M+H]+	808.585	7.81	(18:1_20:4; 16:0_22:5)	Glycerophospholipids	level2
PC 38:6-2peaks	Positive	[M+H]+	806.569	7.29	(16:1_22:5; 18:2_20:4; 16:0_22:6)	Glycerophospholipids	level2
PC 38:7	Positive	[M+H]+	804.554	6.46	(18:2_20:5; 18:3_20:4)	Glycerophospholipids	level2
PC 39:1	Positive	[M+H]+	830.663	10.36	—	Glycerophospholipids	level2
PC 39:2	Positive	[M+H]+	828.648	9.78	(19:1_20:1; 18:1_21:1)	Glycerophospholipids	level2
PC 39:3-2peaks	Positive	[M+H]+	826.632	9.15	—	Glycerophospholipids	level2
PC 39:4	Positive	[M+H]+	824.616	8.71	—	Glycerophospholipids	level2
PC 39:5-2peaks	Positive	[M+H]+	822.601	8.08	(17:0_22:5)	Glycerophospholipids	level2
PC 39:6	Positive	[M+H]+	820.585	7.81	—	Glycerophospholipids	level2
PC 39:7	Positive	[M+H]+	818.569	7.01	—	Glycerophospholipids	level2
PC 40:0	Positive	[M+H]+	846.695	11.44	(16:0_24:0)	Glycerophospholipids	level2
PC 40:10	Positive	[M+H]+	826.539	5.39	—	Glycerophospholipids	level2
PC 40:1-2peaks	Positive	[M+H]+	844.679	10.71	(16:0_24:1; 18:0_22:1)	Glycerophospholipids	level2
PC 40:2	Positive	[M+H]+	842.663	10.15	(18:1_22:1; 20:1_20:1; 16:1_24:1)	Glycerophospholipids	level2
PC 40:3-2peaks	Positive	[M+H]+	840.648	9.57	(20:0_20:3; 18:0_22:3)	Glycerophospholipids	level2
PC 40:4-2peaks	Positive	[M+H]+	838.632	8.98	(20:1_20:3; 18:0_22:4; 20:0_20:4)	Glycerophospholipids	level2
PC 40:5	Positive	[M+H]+	836.616	8.57	(18:0_22:5; 18:1_22:4; 20:1_22:4)	Glycerophospholipids	level2
PC 40:6	Positive	[M+H]+	834.601	8.32	(18:1_22:5; 20:3_20:3; 16:0_24:6; 18:0_22:6)	Glycerophospholipids	level2
PC 40:7	Positive	[M+H]+	832.585	7.5	(18:1_22:6; 20:3_20:4)	Glycerophospholipids	level2
PC 40:8-1	Positive	[M+H]+	830.569	6.67	—	Glycerophospholipids	level2
PC 40:8-2	Positive	[M+H]+	830.569	6.91	(20:4_20:4; 20:3_20:5)	Glycerophospholipids	level2
PC 40:9-1	Positive	[M+H]+	828.554	5.77	—	Glycerophospholipids	level2
PC 40:9-2	Positive	[M+H]+	828.554	6.15	(20:4_20:5)	Glycerophospholipids	level2
PC 41:0	Positive	[M+H]+	860.71	11.75	(18:0_20:3)	Glycerophospholipids	level2
PC 41:1	Positive	[M+H]+	858.695	11.06	(16:0_25:1; 15:0_26:1)	Glycerophospholipids	level2
PC 41:2	Positive	[M+H]+	856.679	10.53	—	Glycerophospholipids	level2
PC 41:3	Positive	[M+H]+	854.663	9.98	—	Glycerophospholipids	level2
PC 41:4	Positive	[M+H]+	852.648	9.4	—	Glycerophospholipids	level2
PC 41:5	Positive	[M+H]+	850.632	9.02	(19:0_22:5)	Glycerophospholipids	level2
PC 41:7	Positive	[M+H]+	846.601	7.95	—	Glycerophospholipids	level2
PC 42:0	Positive	[M+H]+	874.726	12.03	(16:0_26:0)	Glycerophospholipids	level2
PC 42:10-1	Positive	[M+H]+	854.569	6.22	(20:5_22:5)	Glycerophospholipids	level2
PC 42:10-2	Positive	[M+H]+	854.569	6.6	(20:4_22:6)	Glycerophospholipids	level2
PC 42:11	Positive	[M+H]+	852.554	5.81	(20:5_22:6)	Glycerophospholipids	level2
PC 42:1-2peaks	Positive	[M+H]+	872.71	11.58	(18:1_24:0)	Glycerophospholipids	level2
PC 42:2	Positive	[M+H]+	870.695	10.88	(18:0_24:1; 20:1_22:1; 16:0_26:2; 16:1_26:1)	Glycerophospholipids	level2
PC 42:3	Positive	[M+H]+	868.68	10.33	(18:2_24:1; 18:1_24:2)	Glycerophospholipids	level2
PC 42:4	Positive	[M+H]+	866.663	9.78	(20:3_22:1; 18:0_24:4)	Glycerophospholipids	level2
PC 42:5-1	Positive	[M+H]+	864.648	9.22	—	Glycerophospholipids	level2
PC 42:5-2	Positive	[M+H]+	864.648	9.5	—	Glycerophospholipids	level2
PC 42:6-1	Positive	[M+H]+	862.632	8.67	—	Glycerophospholipids	level2
PC 42:6-2	Positive	[M+H]+	862.632	8.88	(18:0_24:6)	Glycerophospholipids	level2
PC 42:7-1	Positive	[M+H]+	860.616	8.12	—	Glycerophospholipids	level2
PC 42:7-2	Positive	[M+H]+	860.616	8.39	—	Glycerophospholipids	level2
PC 42:8-1	Positive	[M+H]+	858.601	7.29	(20:3_22:5)	Glycerophospholipids	level2
PC 42:8-2	Positive	[M+H]+	858.601	7.63	—	Glycerophospholipids	level2
PC 42:9	Positive	[M+H]+	856.585	6.91	(20:4_22:5)	Glycerophospholipids	level2
PC 43:0	Positive	[M+H]+	888.742	12.24	(20:0_23:0)	Glycerophospholipids	level2
PC 43:1	Positive	[M+H]+	886.726	11.86	(26:0_17:1; 25:0_18:1)	Glycerophospholipids	level2
PC 43:2	Positive	[M+H]+	884.71	11.19	—	Glycerophospholipids	level2
PC 43:5	Positive	[M+H]+	878.663	9.91	—	Glycerophospholipids	level2
PC 44:0	Positive	[M+H]+	902.757	12.52	(18:0_26:0)	Glycerophospholipids	level2
PC 44:1	Positive	[M+H]+	900.742	12.17	(26:0_18:1)	Glycerophospholipids	level2
PC 44:10	Positive	[M+H]+	882.601	6.91	(22:5_22:5)	Glycerophospholipids	level2
PC 44:11	Positive	[M+H]+	880.586	6.63	(22:5_22:6)	Glycerophospholipids	level2
PC 44:12	Positive	[M+H]+	878.569	6.32	(22:6_22:6)	Glycerophospholipids	level2
PC 44:2-2peaks	Positive	[M+H]+	898.726	11.51	(18:1_26:1; 18:2_26:0)	Glycerophospholipids	level2
PC 44:3-1	Positive	[M+H]+	896.71	10.95	—	Glycerophospholipids	level2
PC 44:3-2	Positive	[M+H]+	896.71	11.26	(24:0_20:3)	Glycerophospholipids	level2
PC 44:4-1	Positive	[M+H]+	894.695	10.53	(24:1_20:3)	Glycerophospholipids	level2
PC 44:4-2	Positive	[M+H]+	894.695	11.06	(24:0_20:4)	Glycerophospholipids	level2
PC 44:5-2peaks	Positive	[M+H]+	892.679	10.29	(24:1_20:4)	Glycerophospholipids	level2
PC 44:6-1	Positive	[M+H]+	890.663	9.46	—	Glycerophospholipids	level2
PC 44:6-2	Positive	[M+H]+	890.663	9.74	—	Glycerophospholipids	level2
PC 44:7	Positive	[M+H]+	888.648	9.26	—	Glycerophospholipids	level2
PC 44:9	Positive	[M+H]+	884.616	7.62	—	Glycerophospholipids	level2
PC 46:1	Positive	[M+H]+	928.773	12.66	—	Glycerophospholipids	level2
PC 46:3	Positive	[M+H]+	924.742	11.86	(28:1_18:2)	Glycerophospholipids	level2
PC 46:4	Positive	[M+H]+	922.726	11.68	(26:0_20:4)	Glycerophospholipids	level2
PC 46:5	Positive	[M+H]+	920.71	10.99	(26:1_20:4; 24:0_22:5)	Glycerophospholipids	level2
PC 46:6-1	Positive	[M+H]+	918.695	10.22	—	Glycerophospholipids	level2
PC 46:6-2	Positive	[M+H]+	918.695	10.81	—	Glycerophospholipids	level2
PC 46:7	Positive	[M+H]+	916.679	10.05	—	Glycerophospholipids	level2
PC 48:5	Positive	[M+H]+	948.742	11.61	(28:1_20:4)	Glycerophospholipids	level2
PC 48:6-1	Positive	[M+H]+	946.726	10.92	—	Glycerophospholipids	level2
PC 48:6-2	Positive	[M+H]+	946.726	11.47	—	Glycerophospholipids	level2
PC 48:7	Positive	[M+H]+	944.71	10.78	—	Glycerophospholipids	level2
PC O-28:0	Positive	[M+H]+	664.528	6.77	(O-14:0_14:0)	Glycerophospholipids	level2
PC O-29:0	Positive	[M+H]+	678.543	7.29	(O-15:0_14:0; O-14:0_15:0)	Glycerophospholipids	level2
PC O-30:0	Positive	[M+H]+	692.559	7.84	(O-16:0_14:0; O-14:0_16:0)	Glycerophospholipids	level2
PC O-30:1	Positive	[M+H]+	690.543	7.01	—	Glycerophospholipids	level2
PC O-31:0	Positive	[M+H]+	706.575	8.32	(O-16:0_15:0; O-15:0_16:0)	Glycerophospholipids	level2
PC O-31:1	Positive	[M+H]+	704.559	7.74	—	Glycerophospholipids	level2
PC O-32:0	Positive	[M+H]+	720.59	8.77	(O-16:0_16:0)	Glycerophospholipids	level2
PC O-32:1	Positive	[M+H]+	718.575	8.05	(O-16:0_16:1; O-18:1_14:0)	Glycerophospholipids	level2
PC O-32:2-1	Positive	[M+H]+	716.559	7.25	—	Glycerophospholipids	level2
PC O-32:2-2	Positive	[M+H]+	716.559	7.98	—	Glycerophospholipids	level2
PC O-33:0	Positive	[M+H]+	734.606	9.26	—	Glycerophospholipids	level2
PC O-33:1	Positive	[M+H]+	732.59	8.5	(O-17:1_16:0)	Glycerophospholipids	level2
PC O-33:6	Positive	[M+H]+	722.512	7.63	—	Glycerophospholipids	level2
PC O-33:9	Positive	[M+H]+	716.465	6.12	—	Glycerophospholipids	level2
PC O-34:0	Positive	[M+H]+	748.622	9.67	(O-18:0_16:0)	Glycerophospholipids	level2
PC O-34:1	Positive	[M+H]+	746.606	8.98	(O-16:0_18:1; O-18:1_16:0)	Glycerophospholipids	level2
PC O-34:2	Positive	[M+H]+	744.59	8.26	(O-16:0_18:2; O-16:2_18:0)	Glycerophospholipids	level2
PC O-34:3	Positive	[M+H]+	742.575	8.19	—	Glycerophospholipids	level2
PC O-34:4	Positive	[M+H]+	740.559	7.18	—	Glycerophospholipids	level2
PC O-35:0	Positive	[M+H]+	762.637	9.98	—	Glycerophospholipids	level2
PC O-35:1-all	Positive	[M+H]+	760.622	9.46	(O-17:0_18:1; O-16:0_19:1)	Glycerophospholipids	level2
PC O-35:2	Positive	[M+H]+	758.606	8.74	(O-18:1_17:1; O-17:1_18:1; O-17:0_18:2; O-17:2_18:0)	Glycerophospholipids	level2
PC O-35:4	Positive	[M+H]+	754.575	7.7	(O-20:4_15:0)	Glycerophospholipids	level2
PC O-36:0	Positive	[M+H]+	776.653	10.5	(O-20:0_16:0)	Glycerophospholipids	level2
PC O-36:1	Positive	[M+H]+	774.637	9.88	(O-18:0_18:1)	Glycerophospholipids	level2
PC O-36:2	Positive	[M+H]+	772.622	9.15	(O-18:0_18:2; O-18:1_18:1)	Glycerophospholipids	level2
PC O-36:3	Positive	[M+H]+	770.606	8.53	(O-16:0_20:3)	Glycerophospholipids	level2
PC O-36:4	Positive	[M+H]+	768.59	8.22	(O-16:0_20:4)	Glycerophospholipids	level2
PC O-36:5	Positive	[M+H]+	766.575	7.5	(O-16:1_20:4)	Glycerophospholipids	level2
PC O-36:6	Positive	[M+H]+	764.559	7.39	—	Glycerophospholipids	level2
PC O-36:7	Positive	[M+H]+	762.543	6.74	—	Glycerophospholipids	level2
PC O-37:0	Positive	[M+H]+	790.668	10.88	—	Glycerophospholipids	level2
PC O-37:2	Positive	[M+H]+	786.637	9.5	(O-16:2_21:0)	Glycerophospholipids	level2
PC O-37:3-1	Positive	[M+H]+	784.622	9.02	—	Glycerophospholipids	level2
PC O-37:3-2	Positive	[M+H]+	784.622	9.36	—	Glycerophospholipids	level2
PC O-37:4	Positive	[M+H]+	782.606	8.71	(O-20:4_17:0)	Glycerophospholipids	level2
PC O-38:0	Positive	[M+H]+	804.684	11.23	(O-22:0_16:0)	Glycerophospholipids	level2
PC O-38:1	Positive	[M+H]+	802.668	10.64	(O-20:0_18:1)	Glycerophospholipids	level2
PC O-38:2-2peaks	Positive	[M+H]+	800.653	10.05	—	Glycerophospholipids	level2
PC O-38:3-1	Positive	[M+H]+	798.637	9.46	(O-18:0_20:3)	Glycerophospholipids	level2
PC O-38:3-2	Positive	[M+H]+	798.637	9.78	—	Glycerophospholipids	level2
PC O-38:4	Positive	[M+H]+	796.622	9.15	(O-18:0_20:4)	Glycerophospholipids	level2
PC O-38:5-1	Positive	[M+H]+	794.606	8.19	(O-16:0_22:5)	Glycerophospholipids	level2
PC O-38:5-2	Positive	[M+H]+	794.606	8.36	(O-18:1_20:4)	Glycerophospholipids	level2
PC O-38:6	Positive	[M+H]+	792.59	7.91	(O-16:0_22:6)	Glycerophospholipids	level2
PC O-38:7	Positive	[M+H]+	790.574	7.81	(O-16:1_22:6)	Glycerophospholipids	level2
PC O-39:0	Positive	[M+H]+	818.7	11.54	(O-16:0_23:0)	Glycerophospholipids	level2
PC O-39:10	Positive	[M+H]+	798.543	8.98	—	Glycerophospholipids	level2
PC O-39:5	Positive	[M+H]+	808.621	8.67	(O-20:4_19:1)	Glycerophospholipids	level2
PC O-40:0	Positive	[M+H]+	832.715	11.86	(O-24:0_16:0)	Glycerophospholipids	level2
PC O-40:1-1	Positive	[M+H]+	830.7	11.16	(O-16:0_24:1)	Glycerophospholipids	level2
PC O-40:1-2	Positive	[M+H]+	830.7	11.37	—	Glycerophospholipids	level2
PC O-40:2-2peaks	Positive	[M+H]+	828.684	10.67	(O-16:0_24:2)	Glycerophospholipids	level2
PC O-40:3-3peaks	Positive	[M+H]+	826.668	10.29	(O-20:0_20:3)	Glycerophospholipids	level2
PC O-40:4-1	Positive	[M+H]+	824.653	9.71	(O-18:0_22:4)	Glycerophospholipids	level2
PC O-40:4-2	Positive	[M+H]+	824.653	10.02	(O-20:0_20:4)	Glycerophospholipids	level2
PC O-40:5	Positive	[M+H]+	822.637	9.12	(O-18:0_22:5)	Glycerophospholipids	level2
PC O-40:6	Positive	[M+H]+	820.622	8.88	(O-18:0_22:6; O-22:6_18:0)	Glycerophospholipids	level2
PC O-40:7	Positive	[M+H]+	818.606	8.05	(O-18:1_22:6)	Glycerophospholipids	level2
PC O-40:8	Positive	[M+H]+	816.59	7.95	—	Glycerophospholipids	level2
PC O-41:1	Positive	[M+H]+	844.715	11.51	(O-18:1_23:0)	Glycerophospholipids	level2
PC O-41:2	Positive	[M+H]+	842.7	10.99	—	Glycerophospholipids	level2
PC O-42:0	Positive	[M+H]+	860.747	12.42	(O-18:0_24:0)	Glycerophospholipids	level2
PC O-42:1	Positive	[M+H]+	858.731	11.99	(O-24:0_18:1; O-18:0_24:1; O-16:0_26:1)	Glycerophospholipids	level2
PC O-42:2-2peaks	Positive	[M+H]+	856.715	11.33	(O-24:1_18:1)	Glycerophospholipids	level2
PC O-42:4	Positive	[M+H]+	852.684	10.81	(O-22:0_20:4)	Glycerophospholipids	level2
PC O-42:5-1	Positive	[M+H]+	850.668	9.98	(O-20:0_22:5)	Glycerophospholipids	level2
PC O-42:5-2	Positive	[M+H]+	850.668	10.29	—	Glycerophospholipids	level2
PC O-42:6	Positive	[M+H]+	848.653	9.74	(O-20:0_22:6; O-24:6_18:0)	Glycerophospholipids	level2
PC O-42:7	Positive	[M+H]+	846.637	9.67	—	Glycerophospholipids	level2
PC O-43:1	Positive	[M+H]+	872.747	12.28	(O-20:1_23:0)	Glycerophospholipids	level2
PC O-43:2	Positive	[M+H]+	870.731	11.65	(O-20:2_23:0)	Glycerophospholipids	level2
PC O-43:4	Positive	[M+H]+	866.7	11.16	(O-20:4_23:0)	Glycerophospholipids	level2
PC O-43:5	Positive	[M+H]+	864.684	10.4	—	Glycerophospholipids	level2
PC O-44:1	Positive	[M+H]+	886.762	12.52	(O-20:0_24:1)	Glycerophospholipids	level2
PC O-44:2	Positive	[M+H]+	884.747	11.93	(O-26:1_18:1)	Glycerophospholipids	level2
PC O-44:3	Positive	[M+H]+	882.731	11.68	(O-24:0_20:3)	Glycerophospholipids	level2
PC O-44:4	Positive	[M+H]+	880.715	11.51	(O-24:0_20:4)	Glycerophospholipids	level2
PC O-44:5-2peaks	Positive	[M+H]+	878.7	10.78	(O-24:1_20:4)	Glycerophospholipids	level2
PC O-44:6	Positive	[M+H]+	876.684	10.53	(O-22:0_22:6)	Glycerophospholipids	level2
PC O-45:5	Positive	[M+H]+	892.715	11.12	—	Glycerophospholipids	level2
PC O-46:5	Positive	[M+H]+	906.731	11.44	(O-24:0_22:5; O-26:5_20:4)	Glycerophospholipids	level2
PC O-46:6-1	Positive	[M+H]+	904.715	10.71	(O-24:1_22:5)	Glycerophospholipids	level2
PC O-46:6-2	Positive	[M+H]+	904.715	11.26	(O-24:0_22:6)	Glycerophospholipids	level2
PC O-46:7	Positive	[M+H]+	902.7	10.5	(O-24:1_22:6)	Glycerophospholipids	level2
PC O-47:7	Positive	[M+H]+	916.715	10.88	—	Glycerophospholipids	level2
PE O-30:1	Positive	[M+H]+	648.496	8.01	(O-16:1_14:0)	Glycerophospholipids	level2
PE O-34:0	Positive	[M-H]-	704.56	9.93	(O-18:0_16:0)	Glycerophospholipids	level2
PE O-34:1	Positive	[M+H]+	704.559	9.19	(O-18:0_16:1)	Glycerophospholipids	level2
PE O-34:2	Positive	[M-H]-	700.529	9.2	(O-16:1_18:1; O-18:1_16:1)	Glycerophospholipids	level2
PE O-36:1	Positive	[M+H]+	732.59	10.05	(O-18:1_18:0; O-18:0_18:1)	Glycerophospholipids	level2
PE O-36:4	Positive	[M+H]+	726.543	8.43	—	Glycerophospholipids	level2
PE O-38:4	Positive	[M+H]+	754.575	9.36	(O-18:2_20:2)	Glycerophospholipids	level2
PE O-39:2	Positive	[M+H]+	772.622	9.78	—	Glycerophospholipids	level2
PE O-40:3	Positive	[M+H]+	784.622	10.47	(O-18:0_22:3)	Glycerophospholipids	level2
PE O-40:4	Positive	[M+H]+	782.606	10.22	—	Glycerophospholipids	level2
PE P-32:0	Positive	[M+H]+	676.528	8.95	(P-16:0_16:0)	Glycerophospholipids	level2
PE P-32:1	Positive	[M+H]+	674.512	8.22	(P-16:0_16:1)	Glycerophospholipids	level2
PE P-34:1	Positive	[M+H]+	702.543	9.15	(P-16:0_18:1; P-18:0_16:1; P-18:1_16:0)	Glycerophospholipids	level2
PE P-34:2	Positive	[M+H]+	700.528	8.43	(P-16:0_18:2)	Glycerophospholipids	level2
PE P-34:4	Positive	[M+H]+	696.496	7.32	(P-14:0_20:4)	Glycerophospholipids	level2
PE P-35:1	Positive	[M+H]+	716.559	9.6	(P-17:0_18:1; P-16:0_19:1)	Glycerophospholipids	level2
PE P-35:2	Positive	[M+H]+	714.543	8.88	(P-17:0_18:2)	Glycerophospholipids	level2
PE P-36:1	Positive	[M+H]+	730.575	9.98	(P-16:0_20:1; P-18:0_18:1)	Glycerophospholipids	level2
PE P-36:2	Positive	[M+H]+	728.559	9.36	(P-18:1_18:1; P-18:0_18:2; P-16:0_20:2)	Glycerophospholipids	level2
PE P-36:3-1	Positive	[M+H]+	726.543	8.67	(P-16:0_20:3)	Glycerophospholipids	level2
PE P-36:3-2	Positive	[M+H]+	726.543	9.02	(P-16:0_20:3)	Glycerophospholipids	level2
PE P-36:4-1	Positive	[M+H]+	724.528	7.98	(P-16:0_20:4)	Glycerophospholipids	level2
PE P-36:4-2	Positive	[M+H]+	724.528	8.32	(P-16:0_20:4)	Glycerophospholipids	level2
PE P-36:6	Positive	[M+H]+	720.496	7.01	(P-16:1_20:5)	Glycerophospholipids	level2
PE P-37:1	Positive	[M+H]+	744.59	10.29	(P-18:0_19:1; P-19:0_18:1; P-17:0_20:1; P-16:0_21:1)	Glycerophospholipids	level2
PE P-37:2	Positive	[M+H]+	742.574	9.8	(P-17:0_20:2; P-18:0_19:2)	Glycerophospholipids	level2
PE P-37:3	Positive	[M+H]+	740.559	9.15	(P-17:0_20:3)	Glycerophospholipids	level2
PE P-37:4	Positive	[M+H]+	738.543	8.81	(P-17:0_20:4)	Glycerophospholipids	level2
PE P-38:1	Positive	[M+H]+	758.606	10.78	(P-18:0_20:1)	Glycerophospholipids	level2
PE P-38:2	Positive	[M+H]+	756.59	10.19	(P-18:0_20:2; P-20:0_18:2)	Glycerophospholipids	level2
PE P-38:3	Positive	[M+H]+	754.575	9.57	(P-18:0_20:3)	Glycerophospholipids	level2
PE P-38:4	Positive	[M+H]+	752.559	9.29	(P-18:1_20:3)	Glycerophospholipids	level2
PE P-38:5	Positive	[M+H]+	750.543	8.32	(P-16:0_22:5)	Glycerophospholipids	level2
PE P-38:7	Positive	[M+H]+	746.512	6.87	(P-16:1_22:6)	Glycerophospholipids	level2
PE P-39:5	Positive	[M+H]+	764.559	8.8	(P-17:0_22:5)	Glycerophospholipids	level2
PE P-40:2-2peaks	Positive	[M+H]+	784.622	10.78	(P-20:1_20:2; P-22:1_18:2)	Glycerophospholipids	level2
PE P-40:3	Positive	[M+H]+	782.606	10.4	(P-20:0_20:3; P-18:0_22:3)	Glycerophospholipids	level2
PE P-40:4-1	Positive	[M+H]+	780.59	9.84	(P-18:0_22:4)	Glycerophospholipids	level2
PE P-40:4-2	Positive	[M+H]+	780.59	10.12	(P-20:0_20:4)	Glycerophospholipids	level2
PE P-40:5	Positive	[M+H]+	778.575	9.22	(P-18:0_22:5)	Glycerophospholipids	level2
PE P-40:6	Positive	[M+H]+	776.559	8.98	(P-18:0_22:6)	Glycerophospholipids	level2
PE P-40:7	Positive	[M+H]+	774.544	7.88	(P-18:1_22:6)	Glycerophospholipids	level2
PE P-42:2	Positive	[M+H]+	812.653	11.44	(P-24:1_18:1)	Glycerophospholipids	level2
PE P-42:3	Positive	[M+H]+	810.637	10.95	(P-22:0_20:3)	Glycerophospholipids	level2
PE P-42:5	Positive	[M+H]+	806.606	10.12	(P-20:0_22:5)	Glycerophospholipids	level2
PE P-42:6	Positive	[M+H]+	804.59	9.84	(P-20:0_22:6)	Glycerophospholipids	level2
PE P-44:5	Positive	[M+H]+	834.637	10.85	(P-24:1_20:4; P-22:0_22:5)	Glycerophospholipids	level2
PE P-44:6	Positive	[M+H]+	832.621	10.64	(P-22:0_22:6)	Glycerophospholipids	level2
PE P-46:6	Positive	[M+H]+	860.653	10.8	(P-24:1_22:5)	Glycerophospholipids	level2
PE P-46:7	Positive	[M+H]+	858.637	10.6	(P-24:1_22:6)	Glycerophospholipids	level2
SM 28:1; 2O	Positive	[M+H]+	619.481	3.89	—	Sphingolipids	level2
SM 30:1; 2O	Positive	[M+H]+	647.512	4.94	(18:1;2O_12:0)	Sphingolipids	level2
SM 31:1; 2O	Positive	[M+H]+	661.528	5.46	—	Sphingolipids	level2
SM 32:0; 2O	Positive	[M+H]+	677.559	6.42	—	Sphingolipids	level2
SM 32:1; 2O	Positive	[M+H]+	675.544	6.08	—	Sphingolipids	level2
SM 32:1; 3O	Positive	[M+H]+	691.539	5.67	—	Sphingolipids	level2
SM 32:2; 2O	Positive	[M+H]+	673.528	5.11	—	Sphingolipids	level2
SM 33:0; 2O	Positive	[M+H]+	691.575	6.98	—	Sphingolipids	level2
SM 33:1; 2O	Positive	[M+H]+	689.559	6.6	(17:1;2O_16:0)	Sphingolipids	level2
SM 33:2; 2O	Positive	[M+H]+	687.544	5.67	—	Sphingolipids	level2
SM 34:0; 2O	Positive	[M+H]+	705.591	7.53	—	Sphingolipids	level2
SM 34:1; 2O	Positive	[M+H]+	703.575	7.15	(18:1;2O_16:0)	Sphingolipids	level2
SM 34:2; 2O	Positive	[M+H]+	701.559	6.25	(18:2;2O_16:0)	Sphingolipids	level2
SM 34:2; 3O	Positive	[M+H]+	717.554	5.87	—	Sphingolipids	level2
SM 35:0; 2O	Positive	[M+H]+	719.606	8.05	—	Sphingolipids	level2
SM 35:1; 2O	Positive	[M+H]+	717.591	7.7	(18:1;2O_17:0)	Sphingolipids	level2
SM 35:2; 2O	Positive	[M+H]+	715.575	6.84	—	Sphingolipids	level2
SM 36:0; 2O	Positive	[M+H]+	733.622	8.53	—	Sphingolipids	level2
SM 36:1; 2O	Positive	[M+H]+	731.606	8.22	(18:1;2O_18:0)	Sphingolipids	level2
SM 36:2; 2O	Positive	[M+H]+	729.591	7.39	(18:2;2O_18:0)	Sphingolipids	level2
SM 37:1; 2O	Positive	[M+H]+	745.622	8.74	—	Sphingolipids	level2
SM 38:0; 2O	Positive	[M+H]+	761.653	9.5	—	Sphingolipids	level2
SM 38:1; 2O	Positive	[M+H]+	759.638	9.22	(18:1;2O_20:0)	Sphingolipids	level2
SM 38:2; 2O	Positive	[M+H]+	757.622	8.46	(18:2;2O_20:0)	Sphingolipids	level2
SM 39:0; 2O	Positive	[M+H]+	775.669	9.98	(18:0;2O_21:0)	Sphingolipids	level2
SM 39:1; 2O	Positive	[M+H]+	773.653	9.74	—	Sphingolipids	level2
SM 39:2; 2O	Positive	[M+H]+	771.638	8.95	—	Sphingolipids	level2
SM 40:0; 2O	Positive	[M+H]+	789.684	10.36	—	Sphingolipids	level2
SM 40:1; 2O	Positive	[M+H]+	787.669	10.12	—	Sphingolipids	level2
SM 40:2; 2O-2peaks	Positive	[M+H]+	785.653	9.46	(18:2;2O_22:0)	Sphingolipids	level2
SM 40:3; 2O	Positive	[M+H]+	783.638	8.53	—	Sphingolipids	level2
SM 40:5; 2O	Positive	[M+H]+	779.606	7.7	(18:1;2O_22:4)	Sphingolipids	level2
SM 41:0; 2O	Positive	[M+H]+	803.7	10.74	(18:0;2O_23:0)	Sphingolipids	level2
SM 41:1; 2O	Positive	[M+H]+	801.684	10.53	—	Sphingolipids	level2
SM 41:2; 2O-1	Positive	[M+H]+	799.669	9.71	(18:1;2O_23:1)	Sphingolipids	level2
SM 41:2; 2O-2	Positive	[M+H]+	799.669	9.91	—	Sphingolipids	level2
SM 41:3; 2O	Positive	[M+H]+	797.653	8.98	—	Sphingolipids	level2
SM 41:5; 2O	Positive	[M+H]+	793.622	8.15	(18:1;2O_23:4)	Sphingolipids	level2
SM 42:0; 2O	Positive	[M+H]+	817.716	11.12	—	Sphingolipids	level2
SM 42:1; 2O	Positive	[M+H]+	815.7	10.92	(18:1;2O_24:0)	Sphingolipids	level2
SM 42:2; 2O-1	Positive	[M+H]+	813.684	10.09	—	Sphingolipids	level2
SM 42:2; 2O-2	Positive	[M+H]+	813.684	10.33	—	Sphingolipids	level2
SM 42:3; 2O	Positive	[M+H]+	811.669	9.43	—	Sphingolipids	level2
SM 42:4; 2O	Positive	[M+H]+	809.653	8.71	—	Sphingolipids	level2
SM 43:1; 2O	Positive	[M+H]+	829.716	11.26	—	Sphingolipids	level2
SM 43:2; 2O	Positive	[M+H]+	827.7	10.47	—	Sphingolipids	level2
SM 43:3; 2O	Positive	[M+H]+	825.684	9.88	—	Sphingolipids	level2
SM 43:5; 2O	Positive	[M+H]+	821.653	9.08	—	Sphingolipids	level2
SM 44:1; 2O	Positive	[M+H]+	843.731	11.61	(18:1;2O_26:0)	Sphingolipids	level2
SM 44:2; 2O	Positive	[M+H]+	841.716	10.85	—	Sphingolipids	level2
SM 44:3; 2O	Positive	[M+H]+	839.7	10.26	—	Sphingolipids	level2
SM 52:3; 3O	Positive	[M+H]+	967.82	12.45	—	Sphingolipids	level2
SM 54:3; 3O	Positive	[M+H]+	995.851	12.87	—	Sphingolipids	level2
SM 58:3; 3O	Positive	[M+H]+	1051.91	13.71	—	Sphingolipids	level2
SM 60:3; 3O	Positive	[M+H]+	1079.95	13.99	—	Sphingolipids	level2
SPH 18:0; 2O	Positive	[M+H]+	302.305	1.96	(18:0)	Sphingolipids	level2
ST 27:1; O	Positive	[M+H-H2O]+	369.352	5.74	—	Sterol Lipids	level2
ST 27:2; O	Positive	[M+H]+	385.346	5.56	—	Sterol Lipids	level2
ST 28:3; O-1	Positive	[M+H]+	397.346	4.38	—	Sterol Lipids	level2
ST 28:3; O-2	Positive	[M+H]+	397.346	4.8	—	Sterol Lipids	level2
ST 28:4; O-1	Positive	[M+H]+	395.331	3.42	—	Sterol Lipids	level2
ST 28:4; O-2	Positive	[M+H]+	395.331	3.83	—	Sterol Lipids	level2
TG 42:0	Positive	[M+NH4]+	740.676	12.73	(12:0_14:0_16:0)	Glycerolipids	level2
TG 43:0	Positive	[M+NH4]+	754.692	12.94	(13:0_14:0_16:0; 14:0_14:0_15:0; 12:0_15:0_16:0; 13:0_15:0_15:0)	Glycerolipids	level2
TG 44:0	Positive	[M+NH4]+	768.708	13.15	(14:0_14:0_16:0; 13:0_15:0_16:0; 12:0_16:0_16:0)	Glycerolipids	level2
TG 44:1	Positive	[M+NH4]+	766.692	12.84	(12:0_14:0_18:1; 12:0_16:0_16:1; 14:0_14:0_16:1)	Glycerolipids	level2
TG 44:2	Positive	[M+NH4]+	764.676	12.52	(14:0_14:1_16:1)	Glycerolipids	level2
TG 45:0	Positive	[M+NH4]+	782.723	13.36	(15:0_15:0_15:0)	Glycerolipids	level2
TG 45:1	Positive	[M+NH4]+	780.708	13.05	(14:0_15:0_16:1; 15:0_15:0_15:1; 13:0_15:0_17:1; 12:0_15:0_18:1; 13:0_16:0_16:1; 14:0_14:0_17:1; 13:0_14:0_18:1)	Glycerolipids	level2
TG 46:0	Positive	[M+NH4]+	796.739	13.57	(14:0_16:0_16:0; 15:0_15:0_16:0)	Glycerolipids	level2
TG 46:1	Positive	[M+NH4]+	794.723	13.26	(14:0_16:0_16:1; 12:0_16:0_18:1; 15:0_15:0_16:1; 15:0_15:1_16:0; 14:0_14:0_18:1)	Glycerolipids	level2
TG 46:2	Positive	[M+NH4]+	792.708	12.98	(14:0_14:1_18:1; 14:0_16:1_16:1)	Glycerolipids	level2
TG 47:0	Positive	[M+NH4]+	810.755	13.74	(14:0_16:0_17:0; 15:0_15:0_17:0; 14:0_15:0_18:0; 15:0_16:0_16:0)	Glycerolipids	level2
TG 47:1	Positive	[M+NH4]+	808.739	13.47	(15:0_16:0_16:1; 14:0_16:0_17:1; 13:0_16:0_18:1; 14:0_17:0_16:1; 15:0_15:0_17:1; 15:0_14:0_18:1)	Glycerolipids	level2
TG 47:2	Positive	[M+NH4]+	806.723	13.22	(15:0_15:1_17:1; 15:0_16:1_16:1; 14:0_16:1_17:1; 13:0_16:1_18:1; 15:0_14:1_18:1)	Glycerolipids	level2
TG 48:0	Positive	[M+NH4]+	824.77	13.95	(14:0_16:0_18:0; 16:0_16:0_16:0; 15:0_16:0_17:0)	Glycerolipids	level2
TG 48:1	Positive	[M+NH4]+	822.755	13.64	( 14:0_16:0_18:1; 16:0_16:0_16:1; 15:0_17:0_16:1; 14:0_18:0_16:1; 15:0_15:0_18:1)	Glycerolipids	level2
TG 48:2	Positive	[M+NH4]+	820.739	13.29	( 14:0_16:1_18:1; 16:0_16:1_16:1; 14:1_16:0_18:1)	Glycerolipids	level2
TG 48:3	Positive	[M+NH4]+	818.723	12.98	(14:0_18:1_16:2; 16:1_16:1_16:1; 14:1_16:1_18:1; 14:1_16:0_18:2; 14:0_16:0_18:3)	Glycerolipids	level2
TG 49:0	Positive	[M+NH4]+	838.786	14.12	(15:0_16:0_18:0; 16:0_16:0_17:0; 14:0_17:0_18:0; 15:0_17:0_17:0)	Glycerolipids	level2
TG 49:1	Positive	[M+NH4]+	836.77	13.81	(15:0_16:0_18:1; 16:0_16:0_17:1; 16:0_16:1_17:0; 14:0_17:0_18:1; 15:0_17:0_17:1)	Glycerolipids	level2
TG 49:2	Positive	[M+NH4]+	834.755	13.5	(14:0_17:1_18:1; 15:0_16:1_18:1; 15:0_16:0_18:2; 16:0_16:1_17:1; 15:0_17:1_17:1)	Glycerolipids	level2
TG 49:3	Positive	[M+NH4]+	832.739	13.26	(15:1_16:1_18:1; 14:1_17:1_18:1; 16:1_16:1_17:1; 15:1_17:1_17:1)	Glycerolipids	level2
TG 50:0	Positive	[M+NH4]+	852.802	14.3	(16:0_16:0_18:0)	Glycerolipids	level2
TG 50:1	Positive	[M+NH4]+	850.786	13.99	(16:0_18:0_16:1; 16:0_18:1_16:0; 14:0_18:0_18:1)	Glycerolipids	level2
TG 50:2	Positive	[M+NH4]+	848.77	13.67	(16:0_16:1_18:1; 16:1_16:1_18:0; 16:0_16:0_18:2; 14:0_18:1_18:1)	Glycerolipids	level2
TG 50:3	Positive	[M+NH4]+	846.755	13.36	(16:0_16:1_18:2; 16:1_16:1_18:1; 14:0_18:1_18:2; 14:0_16:0_20:3)	Glycerolipids	level2
TG 50:4-2peaks	Positive	[M+NH4]+	844.739	13.01	(16:0_16:1_18:3; 16:1_16:1_18:2; 14:0_18:2_18:2; 14:0_18:1_18:3; 14:0_16:1_20:3)	Glycerolipids	level2
TG 51:0	Positive	[M+NH4]+	866.817	14.47	(16:0_17:0_18:0; 15:0_17:0_19:0; 17:0_17:0_17:0; 15:0_18:0_18:0; 16:0_16:0_19:0)	Glycerolipids	level2
TG 51:1	Positive	[M+NH4]+	864.802	14.16	(16:0_17:0_18:1; 15:0_17:0_19:1; 15:0_18:0_18:1; 16:0_16:0_19:1)	Glycerolipids	level2
TG 51:2	Positive	[M+NH4]+	862.786	13.88	(16:0_17:1_18:1; 17:0_17:1_17:1; 15:0_17:1_19:1; 16:0_16:1_19:1; 15:0_18:1_18:1)	Glycerolipids	level2
TG 51:3	Positive	[M+NH4]+	860.77	13.54	(15:0_18:1_18:2; 16:1_17:1_18:1; 16:0_17:1_18:2; 16:1_16:1_19:1)	Glycerolipids	level2
TG 51:4	Positive	[M+NH4]+	858.755	13.26	(15:0_18:2_18:2; 15:0_16:0_20:4; 15:0_16:1_20:3)	Glycerolipids	level2
TG 52:0	Positive	[M+NH4]+	880.833	14.64	(16:0_18:0_18:0)	Glycerolipids	level2
TG 52:1	Positive	[M+NH4]+	878.817	14.33	(16:0_18:0_18:1; 16:0_16:0_20:1)	Glycerolipids	level2
TG 52:2	Positive	[M+NH4]+	876.802	14.02	(18:0_16:1_18:1; 18:1_16:0_18:1; 18:0_16:0_18:2)	Glycerolipids	level2
TG 52:3	Positive	[M+NH4]+	874.786	13.74	(16:0_18:1_18:2; 16:1_18:1_18:1; 16:0_16:0_20:3)	Glycerolipids	level2
TG 52:4-2peaks	Positive	[M+NH4]+	872.77	13.43	(16:1_18:1_18:2; 16:0_18:2_18:2; 16:0_18:1_18:3; 16:1_16:1_20:3; 16:0_16:0_20:4)	Glycerolipids	level2
TG 52:5-2peaks	Positive	[M+NH4]+	870.755	13.26	(14:0_16:0_22:5; 16:1_16:1_18:3; 16:0_16:1_20:4)	Glycerolipids	level2
TG 52:6	Positive	[M+NH4]+	868.739	12.98	(14:0_16:0_22:6; 16:0_16:1_20:5)	Glycerolipids	level2
TG 53:0	Positive	[M+NH4]+	894.849	14.78	(17:0_16:0_20:0; 17:0_18:0_18:0; 16:0_18:0_19:0; 17:0_17:0_19:0)	Glycerolipids	level2
TG 53:1	Positive	[M+NH4]+	892.833	14.51	(17:0_18:0_18:1; 16:0_18:0_19:1; 16:0_18:1_19:0; 17:0_17:0_19:1; 17:0_17:1_19:0; 16:0_17:0_20:1)	Glycerolipids	level2
TG 53:2	Positive	[M+NH4]+	890.817	14.19	(16:0_18:1_19:1; 16:1_18:0_19:1; 17:0_18:1_18:1; 17:0_18:1_18:1; 17:1_18:0_18:1; 16:0_17:0_20:2; 17:0_17:1_19:1)	Glycerolipids	level2
TG 53:3	Positive	[M+NH4]+	888.802	13.92	(17:0_18:1_18:2; 17:1_18:1_18:1; 16:0_18:2_19:1; 17:1_17:1_19:1; 16:0_18:1_19:2)	Glycerolipids	level2
TG 53:4	Positive	[M+NH4]+	886.786	13.64	(17:1_18:1_18:2; 16:0_18:1_19:3; 17:1_16:0_20:3; 18:1_15:0_20:3; 15:0_16:0_22:4)	Glycerolipids	level2
TG 53:5	Positive	[M+NH4]+	884.77	13.47	(16:1_19:1_20:4; 16:1_19:3_20:2)	Glycerolipids	level2
TG 53:6	Positive	[M+NH4]+	882.755	13.22	(15:0_16:0_22:6)	Glycerolipids	level2
TG 54:0	Positive	[M+NH4]+	908.864	14.92	(16:0_18:0_20:0)	Glycerolipids	level2
TG 54:1	Positive	[M+NH4]+	906.848	14.68	(16:0_18:0_20:1; 16:0_18:1_20:0)	Glycerolipids	level2
TG 54:2	Positive	[M+NH4]+	904.833	14.37	(18:0_18:1_18:1; 16:0_18:0_20:2; 16:0_18:1_20:1; 16:1_18:0_20:1; 16:1_18:1_20:0)	Glycerolipids	level2
TG 54:3	Positive	[M+NH4]+	902.817	14.12	(16:0_18:0_20:3; 16:0_18:1_20:2; 16:0_18:2_20:1)	Glycerolipids	level2
TG 54:4	Positive	[M+NH4]+	900.802	13.81	(16:0_18:1_20:3; 16:0_18:0_20:4; 16:0_18:2_20:2; 16:1_18:1_20:2; 16:1_18:0_20:3; 18:1_18:1_18:2; 18:0_18:2_18:2)	Glycerolipids	level2
TG 54:5	Positive	[M+NH4]+	898.786	13.54	(16:0_18:1_20:4; 16:0_16:00_22:5; 16:1_18:0_20:4; 18:1_18:2_18:2; 18:0_18:2_18:3; 18:1_18:1_18:3)	Glycerolipids	level2
TG 54:6	Positive	[M+NH4]+	896.77	13.43	(18:1_18:2_18:3; 18:2_18:2_18:2; 16:1_18:1_20:4; 16:0_18:2_20:4; 16:0_18:1_20:5)	Glycerolipids	level2
TG 54:7	Positive	[M+NH4]+	894.755	13.05	(16:1_18:1_20:5)	Glycerolipids	level2
TG 55:1	Positive	[M+NH4]+	920.864	14.82	(18:0_18:0_19:1; 18:0_18:1_19:0; 17:0_18:0_20:1; 16:0_18:0_21:1; 15:0_18:0_22:1; 14:0_18:0_23:1; 14:0_17:0_24:1; 17:0_19:0_19:1; 16:0_19:0_20:1; 15:0_19:0_21:1; 17:0_17:0_21:1; 14:0_19:0_22:1; 16:0_17:0_22:1; 15:0_17:0_23:1; 16:0_16:0_23:1; 15:0_16:0_24:1)	Glycerolipids	level2
TG 55:2	Positive	[M+NH4]+	918.848	14.54	(18:0_18:1_19:1; 17:0_18:1_20:1; 16:0_18:1_21:1; 17:0_19:1_19:1; 16:0_19:1_20:1; 15:0_19:1_21:1; 15:0_20:1_20:1; 17:0_17:1_21:1)	Glycerolipids	level2
TG 55:3	Positive	[M+NH4]+	916.833	14.26	(18:1_18:1_19:1; 18:0_18:2_19:1; 17:0_18:2_20:1; 17:0_18:1_20:2; 17:0_18:0_20:3; 16:0_19:1_20:2)	Glycerolipids	level2
TG 55:4	Positive	[M+NH4]+	914.817	13.99	(17:0_18:1_20:3; 17:1_18:0_20:3; 18:1_18:1_19:2; 18:0_18:2_19:2; 18:1_18:2_19:1; 16:0_19:1_20:3)	Glycerolipids	level2
TG 55:5	Positive	[M+NH4]+	912.801	13.74	(16:0_17:0_22:4; 16:0_17:1_22:3	Glycerolipids	level2
TG 55:7	Positive	[M+NH4]+	908.77	13.26	(15:0_18:1_22:6)	Glycerolipids	level2
TG 56:0	Positive	[M+NH4]+	936.895	15.27	(16:0_18:0_22:0; 18:0_18:0_20:0; 16:0_16:0_24:0; 16:0_20:0_20:0)	Glycerolipids	level2
TG 56:1	Positive	[M+NH4]+	934.88	14.96	(16:0_18:0_22:1; 18:0_18:1_20:0; 14:0_18:0_24:1; 14:0_20:0_22:1; 16:0_16:0_24:1)	Glycerolipids	level2
TG 56:2	Positive	[M+NH4]+	932.864	14.71	(18:0_18:1_20:1; 18:0_18:0_20:2; 18:1_18:1_20:0; 16:0_18:1_22:0; 16:0_16:1_24:1)	Glycerolipids	level2
TG 56:3	Positive	[M+NH4]+	930.848	14.43	(18:0_18:1_20:2; 18:1_18:1_20:1; 16:0_18:1_22:2)	Glycerolipids	level2
TG 56:4-2peaks	Positive	[M+NH4]+	928.833	14.16	(18:0_18:1_20:3; 18:1_18:1_20:2; 18:0_18:0_20:4; 16:0_18:1_22:3; 16:0_18:0_22:4)	Glycerolipids	level2
TG 56:5	Positive	[M+NH4]+	926.817	13.92	(16:0_18:0_22:5; 18:0_18:1_22:4; 18:1_18:1_22:3)	Glycerolipids	level2
TG 56:6-2peaks	Positive	[M+NH4]+	924.802	13.6	(16:0_18:1_22:5; 16:0_18:0_22:6)	Glycerolipids	level2
TG 56:7	Positive	[M+NH4]+	922.786	13.47	(16:0_18:1_22:6; 16:0_18:2_22:5)	Glycerolipids	level2
TG 56:8	Positive	[M+NH4]+	920.77	13.15	(16:1_18:1_22:6	Glycerolipids	level2
TG 57:1	Positive	[M+NH4]+	948.896	15.1	(16:0_18:0_23:1; 16:0_17:0_24:1; 16:0_16:0_25:1; 17:0_18:1_22:0; 17:0_17:0_23:1; 15:0_18:0_24:1; 15:0_18:1_24:0; 15:0_17:0_25:1	Glycerolipids	level2
TG 57:2	Positive	[M+NH4]+	946.88	14.85	(16:0_18:1_23:1; 15:1_18:0_24:1; 18:0_18:1_21:1; 18:0_19:1_20:1; 16:0_20:1_21:1; 16:0_17:1_24:1	Glycerolipids	level2
TG 57:3	Positive	[M+NH4]+	944.864	14.57	(18:1_19:1_20:1; 19:1_19:1_19:1; 17:0_19:1_21:2; 18:0_18:1_21:2)	Glycerolipids	level2
TG 57:4	Positive	[M+NH4]+	942.848	14.37	(18:0_18:1_21:3)	Glycerolipids	level2
TG 57:6	Positive	[M+NH4]+	938.818	13.78	(17:0_18:1_22:5; 16:0_19:1_22:5)	Glycerolipids	level2
TG 58:0	Positive	[M+NH4]+	964.927	15.52	(16:0_18:0_24:0; 14:0_18:0_26:0; 14:0_16:0_26:0）	Glycerolipids	level2
TG 58:1	Positive	[M+NH4]+	962.911	15.27	(16:0_18:0_24:1; 18:0_18:0_22:1; 16:0_16:0_26:1; 16:0_20:0_22:1)	Glycerolipids	level2
TG 58:2	Positive	[M+NH4]+	960.895	14.99	(16:0_18:1_24:1; 18:0_18:1_22:1; 18:0_20:1_20:1; 14:0_18:0_26:2; 16:0_16:1_26:2; 16:0_20:1_22:1; 14:0_22:1_22:1; 14:0_20:1_24:1)	Glycerolipids	level2
TG 58:3	Positive	[M+NH4]+	958.88	14.75	(16:0_20:1_22:2; 16:0_20:2_22:1; 16:0_18:1_24:2; 18:1_18:1_22:1; 18:0_18:1_22:2; 18:1_20:1_20:1; 18:0_20:1_20:2; 16:0_16:0_26:3)	Glycerolipids	level2
TG 58:4	Positive	[M+NH4]+	956.864	14.47	(18:0_20:1_20:3; 18:0_20:2_20:2; 18:1_20:1_20:2; 18:1_20:0_20:3; 18:0_18:1_22:3; 18:0_18:0_22:4)	Glycerolipids	level2
TG 58:5	Positive	[M+NH4]+	954.848	14.26	(18:0_18:1_22:4; 16:0_18:1_24:4; 16:0_18:0_24:5; 18:0_20:2_20:3; 18:1_20:2_20:2; 18:1_20:1_20:3; 16:0_20:1_22:4)	Glycerolipids	level2
TG 58:6	Positive	[M+NH4]+	952.833	13.99	(18:0_18:1_22:5; 16:0_20:1_22:5)	Glycerolipids	level2
TG 58:7-1	Positive	[M+NH4]+	950.817	13.67	—	Glycerolipids	level2
TG 58:7-2	Positive	[M+NH4]+	950.817	13.85	(18:0_18:1_22:6)	Glycerolipids	level2
TG 58:8	Positive	[M+NH4]+	948.802	13.5	(18:1_18:1_22:6)	Glycerolipids	level2
TG 59:2	Positive	[M+NH4]+	974.911	15.13	(18:0_18:1_23:1; 17:0_18:1_24:1; 16:0_18:1_25:1)	Glycerolipids	level2
TG 60:1	Positive	[M+NH4]+	990.942	15.55	(18:0_24:0_18:1; 16:0_24:0_20:1; 16:0_18:1_26:0; 16:0_18:0_26:1)	Glycerolipids	level2
TG 60:11	Positive	[M+NH4]+	970.786	12.98	(16:0_22:5_22:6)	Glycerolipids	level2
TG 60:2	Positive	[M+NH4]+	988.927	15.27	(18:0_18:1_24:1; 16:0_20:1_24:1; 16:0_18:1_26:1)	Glycerolipids	level2
TG 60:3	Positive	[M+NH4]+	986.911	15.03	(16:0_20:1_24:2)	Glycerolipids	level2
TG 60:6	Positive	[M+NH4]+	980.864	14.33	(18:0_20:1_22:5; 18:1_20:1_22:4)	Glycerolipids	level2
TG 60:8	Positive	[M+NH4]+	976.833	13.74	(18:0_20:3_22:5)	Glycerolipids	level2
TG 61:2	Positive	[M+NH4]+	1002.94	15.4	(16:0_22:1_23:1; 18:1_18:1_25:0)	Glycerolipids	level2
TG 62:1	Positive	[M+NH4]+	1018.97	15.8	(18:0_26:0_18:1)	Glycerolipids	level2
TG 62:11	Positive	[M+NH4]+	998.817	13.4	(18:0_22:5_22:6)	Glycerolipids	level2
TG 62:2	Positive	[M+NH4]+	1016.96	15.55	(18:0_18:1_26:1; 18:0_20:1_24:1; 18:1_20:0_24:1)	Glycerolipids	level2
TG 62:3	Positive	[M+NH4]+	1014.94	15.31	(18:1_20:1_24:1; 18:0_20:2_24:1; 18:0_18:1_26:2; 18:1_18:1_26:1)	Glycerolipids	level2
TG 66:2	Positive	[M+NH4]+	1073.02	16.01	(24:0_18:1_24:1)	Glycerolipids	level2
TG O-44:0	Positive	[M+NH4]+	754.728	13.71	(16:0_12:0_16:0; 16:0_14:0_14:0; 15:0_15:0_14:0)	Glycerolipids	level2
TG O-46:0	Positive	[M+NH4]+	782.76	14.12	(16:0_14:0_16:0; 16:0_13:0_17:0; 12:0_17:0_17:0; 14:0_15:0_17:0; 14:0_16:0_16:0; 15:0_15:0_16:0)	Glycerolipids	level2
TG O-46:1	Positive	[M+NH4]+	780.744	13.78	(16:0_14:0_16:1; 16:1_14:0_16:0; 16:1_15:0_15:0; 17:1_14:0_15:0; 18:1_14:0_14:0)	Glycerolipids	level2
TG O-47:0	Positive	[M+NH4]+	796.775	14.3	(18:0_14:0_15:0; 17:0_14:0_16:0; 17:0_15:0_15:0; 16:0_16:0_15:0)	Glycerolipids	level2
TG O-48:0	Positive	[M+NH4]+	810.791	14.44	(18:0_14:0_16:0; 18:0_15:0_15:0; 17:0_16:0_15:0; 17:0_17:0_14:0)	Glycerolipids	level2
TG O-48:1	Positive	[M+NH4]+	808.775	14.16	(18:1_14:0_16:0; 16:1_16:0_16:0; 17:1_16:0_15:0)	Glycerolipids	level2
TG O-49:0	Positive	[M+NH4]+	824.807	14.61	(18:0_15:0_16:0; 18:0_17:0_14:0; 17:0_16:0_16:0; 17:0_17:0_15:0)	Glycerolipids	level2
TG O-49:1	Positive	[M+NH4]+	822.791	14.33	(15:0_16:0_18:1; 16:0_16:0_17:1)	Glycerolipids	level2
TG O-50:0	Positive	[M+NH4]+	838.822	14.78	(16:0_16:0_18:0; 15:0_17:0_18:0; 18:0_18:0_14:0)	Glycerolipids	level2
TG O-50:1	Positive	[M+NH4]+	836.807	14.51	(16:0_16:0_18:1; 18:0_17:1_15:0; 18:0_18:1_14:0)	Glycerolipids	level2
TG O-50:2	Positive	[M+NH4]+	834.791	14.19	(18:1_14:0_18:1; 18:1_15:0_17:1; 18:2_16:0_16:0; 18:1_16:1_16:1; 17:1_17:1_16:0)	Glycerolipids	level2
TG O-51:0	Positive	[M+NH4]+	852.838	14.92	(18:0_15:0_18:0; 18:0_17:0_16:0; 18:0_18:0_15:0)	Glycerolipids	level2
TG O-51:1	Positive	[M+NH4]+	850.822	14.64	(18:1_16:0_17:0; 18:0_16:0_17:1; 17:0_17:0_17:1; 15:0_17:0_19:1; 14:0_17:0_20:1; 15:0_18:0_18:1; 16:0_16:0_19:1; 14:0_18:0_19:1; 15:0_16:0_20:1)	Glycerolipids	level2
TG O-51:2	Positive	[M+NH4]+	848.807	14.37	(17:1_16:0_18:1; 18:1_15:0_18:1; 20:2_15:0_16:0)	Glycerolipids	level2
TG O-52:0	Positive	[M+NH4]+	866.854	15.1	(18:0_16:0_18:0; 18:0_17:0_17:0; 21:0_17:0_14:0)	Glycerolipids	level2
TG O-52:1	Positive	[M+NH4]+	864.838	14.82	(18:0_16:0_18:1; 17:0_17:0_18:1; 17:0_17:1_18:0; 14:0_18:0_20:1; 16:0_16:0_20:1; 15:0_17:0_20:1)	Glycerolipids	level2
TG O-52:2	Positive	[M+NH4]+	862.822	14.54	(18:1_16:0_18:1; 18:1_18:0_16:0; 18:1_17:0_17:1; 18:0_17:1_17:1)	Glycerolipids	level2
TG O-52:3	Positive	[M+NH4]+	860.807	14.26	(18:1_16:1_18:1; 16:0_16:0_20:3; 14:0_18:0_20:3)	Glycerolipids	level2
TG O-53:0	Positive	[M+NH4]+	880.869	15.24	(17:0_18:0_18:0)	Glycerolipids	level2
TG O-53:1	Positive	[M+NH4]+	878.854	14.96	(19:1_16:0_18:0; 19:1_17:0_17:0; 18:1_18:0_17:0; 18:0_17:1_17:0; 18:0_15:0_20:1; 16:0_17:0_20:1)	Glycerolipids	level2
TG O-53:2	Positive	[M+NH4]+	876.838	14.68	(18:1_16:0_19:1; 19:1_15:0_19:1)	Glycerolipids	level2
TG O-53:4	Positive	[M+NH4]+	886.823	14.33	(17:1_16:0_20:3; 15:0_16:0_22:4)	Glycerolipids	level2
TG O-54:0	Positive	[M+NH4]+	894.885	15.41	(19:0_14:0_21:0; 18:0_18:0_18:0; 16:0_19:0_19:0)	Glycerolipids	level2
TG O-54:1	Positive	[M+NH4]+	892.869	15.13	(18:0_18:0_18:1; 17:0_18:1_19:0; 16:0_18:0_20:1; 15:0_18:0_21:1; 14:0_18:0_22:1; 14:0_17:0_23:1; 15:0_19:0_20:1; 17:0_17:0_20:1; 14:0_19:0_21:1; 16:0_17:0_21:1; 15:0_17:0_22:1; 16:0_16:0_22:1; 15:0_16:0_23:1)	Glycerolipids	level2
TG O-54:2	Positive	[M+NH4]+	890.854	14.85	(18:1_16:0_20:1; 17:0_17:1_20:1; 14:0_20:1_20:1; 18:0_18:1_18:1)	Glycerolipids	level2
TG O-54:3	Positive	[M+NH4]+	888.838	14.57	(18:1_16:0_20:2; 18:1_18:1_18:1; 17:0_17:1_20:2)	Glycerolipids	level2
TG O-54:6	Positive	[M+NH4]+	882.791	13.92	(16:0_16:0_22:6; 15:0_17:0_22:6)	Glycerolipids	level2
TG O-55:0	Positive	[M+NH4]+	908.901	15.55	(22:0_16:0_17:0; 21:0_16:0_18:0)	Glycerolipids	level2
TG O-55:1	Positive	[M+NH4]+	906.885	15.24	(19:0_14:0_22:1; 19:1_18:0_18:0; 15:0_18:0_22:1; 16:0_17:0_22:1; 14:0_18:0_23:1; 15:0_17:0_23:1; 16:0_16:0_23:1)	Glycerolipids	level2
TG O-55:2	Positive	[M+NH4]+	904.87	14.99	(17:0_18:0_20:2)	Glycerolipids	level2
TG O-55:3	Positive	[M+NH4]+	902.854	14.75	(21:3_16:0_18:0)	Glycerolipids	level2
TG O-56:0	Positive	[M+NH4]+	922.916	15.69	(22:0_16:0_18:0; 23:0_15:0_18:0)	Glycerolipids	level2
TG O-56:1	Positive	[M+NH4]+	920.901	15.41	(22:1_16:0_18:0; 21:1_18:0_17:0; 21:1_20:0_15:0; 22:1_20:0_14:0; 22:1_17:0_17:0; 23:1_18:0_15:0; 23:1_17:0_16:0; 24:1_18:0_14:0; 24:1_17:0_15:0; 24:1_16:0_16:0)	Glycerolipids	level2
TG O-56:2	Positive	[M+NH4]+	918.885	15.13	(22:1_16:0_18:1; 22:1_16:1_18:0; 22:1_20:1_14:0; 21:1_18:0_17:1; 21:1_20:1_15:0; 21:1_21:1_14:0; 23:1_18:1_15:0; 23:1_17:1_16:0; 24:1_18:1_14:0; 24:1_17:1_15:0; 24:1_16:1_16:0; 20:1_18:1_18:0; 20:1_20:1_16:0)	Glycerolipids	level2
TG O-56:3	Positive	[M+NH4]+	916.869	14.89	(18:1_18:1_20:1; 24:1_18:1_14:1; 24:1_17:1_15:1)	Glycerolipids	level2
TG O-56:4	Positive	[M+NH4]+	914.854	14.68	(16:0_17:0_22:4)	Glycerolipids	level2
TG O-56:5	Positive	[M+NH4]+	912.838	14.4	(18:0_16:0_22:5)	Glycerolipids	level2
TG O-56:7	Positive	[M+NH4]+	908.807	13.95	(18:1_16:0_22:6; 17:1_17:0_22:6)	Glycerolipids	level2
TG O-57:0	Positive	[M+NH4]+	936.932	15.8	(17:0_18:0_22:0)	Glycerolipids	level2
TG O-57:1	Positive	[M+NH4]+	934.916	15.52	(19:0_16:0_22:1; 18:0_16:0_23:1; 17:0_17:0_23:1; 18:0_15:0_24:1; 17:0_16:0_24:1; 18:0_17:0_22:1)	Glycerolipids	level2
TG O-57:2	Positive	[M+NH4]+	932.901	15.27	(19:1_16:0_22:1; 23:1_18:1_16:0)	Glycerolipids	level2
TG O-57:3	Positive	[M+NH4]+	930.885	15.06	(21:3_18:0_18:0)	Glycerolipids	level2
TG O-57:5	Positive	[M+NH4]+	926.854	14.57	(19:1_18:0_20:4)	Glycerolipids	level2
TG O-58:1	Positive	[M+NH4]+	948.932	15.66	(16:0_18:0_24:1; 17:0_17:0_24:1; 17:0_18:0_23:1)	Glycerolipids	level2
TG O-58:2	Positive	[M+NH4]+	946.917	15.41	(16:0_18:1_24:1; 14:0_20:1_24:1; 18:0_20:1_20:1; 15:0_20:1_23:1; 17:1_18:0_23:1)	Glycerolipids	level2
TG O-58:3	Positive	[M+NH4]+	944.901	15.17	(19:1_18:1_21:1)	Glycerolipids	level2
TG O-59:1	Positive	[M+NH4]+	962.947	15.8	(19:1_18:0_22:0; 23:1_18:0_18:0; 25:1_18:0_16:0; 24:1_18:0_17:0)	Glycerolipids	level2
TG O-59:2	Positive	[M+NH4]+	960.932	15.55	(19:1_18:0_22:1; 23:1_20:1_16:0; 23:1_18:0_18:1)	Glycerolipids	level2
TG O-59:5	Positive	[M+NH4]+	954.885	14.89	(19:1_18:0_22:4)	Glycerolipids	level2
TG O-60:2	Positive	[M+NH4]+	974.948	15.69	(18:0_18:1_24:1; 16:0_20:1_24:1; 17:0_20:1_23:1; 18:0_20:1_22:1)	Glycerolipids	level2
TG O-60:3	Positive	[M+NH4]+	972.932	15.45	(18:1_18:1_24:1)	Glycerolipids	level2
Identification level: the level of annotation according to the Chemical Analysis Working Group (CAWG) from the Metabolomics Standard Initiative (MSI) (DOI: 10.1007/s11306-007-0082-2)
