# Supplementary material for: Anti-Allergic Effect of Dietary Polyphenols Curcumin and Epigallocatechin Gallate via Anti-Degranulation in IgE/Antigen-Stimulated Mast Cell Model: A Lipidomics Perspective
Source: Metabolites. 2023 May 5;13(5):628. doi: 10.3390/metabo13050628 (PMC10223132; doi:10.3390/metabo13050628)
Supplement: Supplementary file 1 [file metabolites-13-00628-s001.zip › Table S3.xlsx]

## Sheet: Table S3
Table S3. Statistical information of differential lipids changed by degranulation.
Compound	Veh vs. AG						Curcumin vs. AG						EGCG vs. AG
	p	FDR	VIP[1]	p(corr)[1]	AG/Veh		p	FDR	VIP[1]	p(corr)[1]	Cur/AG		p	FDR	VIP[1]	p(corr)[1]	EGCG/AG
					ratio-1h	ratio-3h					ratio-1h	ratio-3h					ratio-1h	ratio-3h
CAR 16:0	1.05214e-07	1.22194e-06	0.858159	0.627842	0.738776	0.736186	1.26752e-08	8.92208e-07	1.44047	-0.850469	2.16893	2.18372	4.76118e-05	0.000293481	1.36066	-0.459191	0.930636	2.1062
CAR 17:0	9.53494e-09	1.70624e-07	1.15868	0.743455	0.680399	0.703634	1.9102e-06	1.4075e-05	1.35163	-0.817907	1.7388	1.68732	3.49515e-06	3.70284e-05	1.63525	-0.679011	0.993234	2.17198
CAR 18:0	5.47362e-11	2.42503e-09	1.30353	0.80691	0.674825	0.623462	0.000280719	0.00089287	0.64321	-0.483714	1.19403	1.20932	3.82882e-08	1.31005e-06	1.91494	-0.730405	1.1347	2.45136
CAR 18:1	0.00415783	0.0107228	0.545541	0.501542	0.918837	0.777613	1.39359e-05	7.22955e-05	1.20479	-0.745589	1.40818	1.68061	0.034893	0.0709288	0.553283	-0.32062	0.684821	1.94262
CAR 20:0	5.54715e-08	6.79875e-07	1.459	0.862645	0.626649	0.571827	0.087169	0.148092	0.326719	-0.342516	1.05584	1.12559	2.28531e-06	2.66499e-05	0.95591	-0.116874	0.930372	1.49247
CAR 20:1	3.18837e-08	4.36749e-07	1.08511	0.720357	0.719804	0.681937	0.00958613	0.0214021	0.510078	-0.424278	1.14263	1.19011	0.000377339	0.00151689	0.927639	-0.143935	0.906428	1.61312
CAR 24:0	4.50972e-10	1.27237e-08	1.89433	0.964543	0.610536	0.521684	0.000938184	0.0026383	1.22074	-0.746396	1.15915	1.24022	0.351785	0.463241	0.288484	-0.178491	0.849404	1.24128
CAR 24:1	1.77363e-10	6.10322e-09	1.93682	0.946095	0.579669	0.581893	0.000148172	0.000512223	1.41261	-0.68509	1.10272	1.34975	0.0680911	0.126533	0.376969	-0.555591	0.861273	1.2202
FA 13:0	0.00344271	0.00910558	0.823327	0.571912	0.676386	0.955054	0.000691075	0.00199171	1.39709	-0.789619	1.19305	1.46763	0.485083	0.59536	0.40098	0.353355	0.931049	0.924105
FA 14:0	0.000528145	0.00179404	0.87747	0.654435	0.833647	0.680632	0.0297836	0.0580095	0.547366	0.157132	0.722704	1.11932	0.00170601	0.00530432	1.17668	0.645453	0.618799	0.94357
FA 14:1	0.000316732	0.0012046	0.955666	0.644327	0.59633	0.81856	0.678182	0.748977	0.177399	-0.0191192	0.811734	1.18291	0.0660734	0.123029	0.914763	0.541311	0.714622	0.988625
FA 15:0	6.07714e-05	0.00029792	1.11143	0.728744	0.670708	0.682515	0.000274739	0.000876798	1.45493	-0.863563	1.47968	2.09522	0.143966	0.230296	0.600976	0.510409	0.793639	1.02551
FA 16:2	0.00165031	0.00480137	0.763712	0.616909	0.905764	0.589554	0.000921194	0.00260623	0.745877	0.306895	0.586105	1.15268	4.07237e-06	4.07438e-05	1.52055	0.741238	0.424475	0.787262
FA 17:0	0.0128742	0.0284701	0.824663	0.62369	0.888972	0.732374	0.000576323	0.00169166	1.40698	-0.851037	1.46633	1.93409	0.0339304	0.069123	0.886886	0.593431	0.764057	0.940291
FA 18:1	0.00094078	0.0029597	0.662646	0.575208	0.958127	0.552215	5.76917e-07	6.31985e-06	1.03112	0.441952	0.452416	0.990164	3.29369e-06	3.52068e-05	1.36771	0.709561	0.433529	0.882616
FA 19:1	0.00111604	0.00341072	0.626672	0.559595	0.939897	0.505841	5.55886e-07	6.31985e-06	0.956236	0.402535	0.430858	1.06281	1.29524e-07	3.185e-06	1.41991	0.725472	0.356676	0.823302
FA 19:2	0.000161221	0.000672157	0.7199	0.597276	0.933879	0.486894	3.87853e-09	5.31834e-07	1.02359	0.446153	0.402063	1.04872	4.78711e-09	2.97299e-07	1.48995	0.723337	0.325113	0.834949
FA 20:1	0.000480986	0.00165856	0.719476	0.599536	0.901739	0.541474	1.0419e-06	9.04897e-06	0.903755	0.363775	0.513135	1.02178	1.18143e-07	3.1388e-06	1.43332	0.73896	0.409859	0.804053
FA 20:2	6.19398e-05	0.000301722	0.863727	0.660734	0.878836	0.4689	2.80956e-07	3.9638e-06	1.03275	0.456565	0.40077	1.04085	1.87809e-07	4.1895e-06	1.45993	0.714963	0.347562	0.848973
FA 21:0	0.00634216	0.0155793	1.30109	0.705159	0.74286	0.790993	4.10666e-05	0.000176332	1.63141	-0.943475	1.85305	1.617	0.916144	0.95087	0.0651052	0.21887	1.06422	0.9466
FA 21:1	0.000451509	0.00156436	0.728209	0.603567	0.880537	0.610314	0.0486741	0.0895565	0.425658	-0.351392	0.898588	1.68865	2.39092e-07	4.52466e-06	1.48301	0.737637	0.439972	0.817068
FA 21:2	0.000194624	0.000792773	0.932106	0.689921	0.837659	0.413947	1.5875e-08	8.92208e-07	0.995638	0.424641	0.402339	1.05266	1.97841e-08	8.778e-07	1.45984	0.713135	0.32097	0.823883
FA 21:3	0.00851147	0.0200106	0.559108	0.518141	1.14867	0.362469	1.15211e-06	9.91343e-06	1.00508	0.447475	0.32624	1.10415	4.81701e-07	7.73693e-06	1.35899	0.649254	0.252364	1.0983
FA 22:0	7.25197e-05	0.000342627	1.63513	0.815055	0.810827	0.683532	7.82053e-08	1.65464e-06	1.85781	-0.974971	1.53486	1.59464	0.17503	0.267574	0.76292	0.512783	0.983095	0.885528
FA 22:1	0.0109794	0.0249921	1.01589	0.662342	0.901806	0.596777	0.31234	0.416602	0.44575	-0.438136	1.07384	1.32321	0.00716726	0.0177939	0.963705	0.583458	0.669674	1.08079
FA 22:2	0.000114302	0.000512725	1.02553	0.721968	0.809484	0.446279	8.09591e-06	4.54283e-05	0.861617	0.345975	0.509998	1.08882	2.83324e-08	1.14553e-06	1.4782	0.71009	0.349498	0.882117
FA 22:3	0.000151247	0.000644867	1.03841	0.727114	0.843246	0.410862	3.85992e-06	2.51305e-05	0.994147	0.433447	0.42369	1.03452	1.64003e-07	3.8171e-06	1.41708	0.66099	0.318472	1.02344
FA 22:4	0.000137756	0.000600364	0.89273	0.670658	0.905397	0.394109	7.22107e-07	7.46869e-06	1.00599	0.442529	0.381047	1.03796	3.03252e-07	5.22394e-06	1.37155	0.665029	0.305126	1.03373
FA 22:5	2.3176e-05	0.000126311	1.12956	0.752132	0.940161	0.409747	2.81551e-05	0.000127448	0.915787	0.400193	0.481884	1.11837	2.14532e-06	2.60203e-05	1.38856	0.645431	0.367936	1.04477
FA 22:6	8.8102e-06	5.57967e-05	1.05847	0.74021	0.849617	0.373814	0.000132276	0.00046727	0.751181	0.30816	0.486067	1.29642	3.1432e-07	5.31516e-06	1.3718	0.657756	0.307627	1.05541
FA 23:0	2.52891e-06	1.89894e-05	1.77177	0.928615	0.741816	0.633369	1.58489e-09	3.05368e-07	1.86742	-0.973182	1.56784	1.73219	0.54597	0.64834	0.220997	0.485563	1.05942	0.868677
FA 23:1	5.96251e-09	1.08799e-07	1.37062	0.86068	0.783412	0.515783	5.54884e-07	6.31985e-06	1.65456	-0.926784	1.64391	2.65777	6.79441e-09	3.51194e-07	1.46938	0.793813	0.566995	0.784337
FA 24:0	7.99013e-06	5.16576e-05	1.21285	0.80078	0.894729	0.748909	8.18753e-09	7.14331e-07	1.62393	-0.846719	1.18054	1.60337	0.124527	0.20629	0.415755	0.504884	0.886309	1.04942
FA 24:1	1.57525e-07	1.75117e-06	1.39878	0.866976	0.81893	0.535865	1.31725e-08	8.92208e-07	1.62984	-0.896766	1.4548	2.21482	9.78834e-09	4.7971e-07	1.48388	0.810517	0.604207	0.787319
FA 24:2	1.42698e-05	8.37314e-05	1.12935	0.764577	0.813897	0.453247	0.088525	0.149577	0.290102	-0.260991	0.874585	1.65209	7.84382e-08	2.28095e-06	1.47414	0.750404	0.414362	0.81203
FA 24:3	0.00021575	0.00087433	0.964901	0.696524	0.821791	0.445568	0.000935025	0.00263783	0.564382	0.194987	0.593102	1.33093	3.9354e-08	1.31005e-06	1.40083	0.675862	0.346846	0.998972
FA 24:4	0.000442551	0.001554	0.928925	0.677035	0.804744	0.431087	2.92152e-06	2.01372e-05	0.925075	0.40576	0.429455	1.12951	2.34571e-07	4.52466e-06	1.30474	0.643343	0.348196	1.11004
FA 24:5	0.00111737	0.00341072	0.928765	0.677068	0.81704	0.443395	8.49917e-05	0.000326808	0.814193	0.350559	0.468335	1.25838	2.01988e-06	2.50749e-05	1.15409	0.523339	0.343251	1.39325
FA 24:6	0.00159994	0.00466941	0.799984	0.624729	0.852738	0.456512	6.85542e-09	7.09629e-07	1.15708	0.526937	0.317892	0.886148	4.91243e-10	1.1428e-07	1.58193	0.729267	0.247215	0.768431
FA 25:0	0.0132083	0.028934	1.09526	0.65536	0.698191	0.854299	0.903695	0.926586	0.0675463	-0.00362223	0.929859	1.05521	0.794167	0.844994	0.168064	0.225498	1.03971	0.899256
FA 25:1	0.000117087	0.000521182	0.720168	0.60017	0.926509	0.617013	0.182195	0.266286	0.162424	-0.154238	0.807639	1.56309	9.84946e-08	2.77889e-06	1.29688	0.745766	0.558375	0.842863
FA 26:1	0.00124328	0.00375897	0.509534	0.503621	0.939143	0.691622	0.19243	0.27862	0.139076	-0.0251737	0.759628	1.40392	2.38473e-07	4.52466e-06	1.17688	0.69423	0.569651	0.960998
FA 26:2	0.000315656	0.0012046	0.727044	0.597977	0.888279	0.515581	0.687582	0.757561	0.0481047	-0.143549	0.793506	1.65339	6.44965e-09	3.51194e-07	1.31258	0.717012	0.435601	0.893791
FA 26:3	0.000638462	0.00212135	0.795743	0.622722	0.876569	0.460362	0.00165396	0.0044633	0.530167	0.178641	0.597861	1.36059	2.49228e-07	4.54547e-06	1.26593	0.676884	0.404315	1.01022
FA 26:4	0.0035949	0.00946107	0.724882	0.594768	0.883901	0.488552	0.000200526	0.000663585	0.642871	0.240974	0.558526	1.29183	4.45201e-08	1.38098e-06	1.3792	0.673491	0.33942	1.00921
FA 28:7	0.000487942	0.00167649	0.973693	-0.668579	1.09235	1.11115	5.60003e-05	0.000229674	1.36548	0.804688	0.860017	0.822409	0.965107	0.979841	0.0180899	-0.387633	1.02793	0.973951
OxFA 17:0;O	0.0131199	0.0288082	1.26475	-0.607913	1.07512	1.08411	2.06985e-06	1.49393e-05	1.65615	-0.928719	1.5446	1.26741	0.0207381	0.0454286	1.13044	-0.0970703	1.12425	0.997055
NAE 28:6	0.0197523	0.0414175	0.343382	-0.0504144	0.984297	0.898221	0.337084	0.443883	1.88125	0.955449	0.0328947	0.0587358	0.420699	0.531439	0.188133	-0.375941	0.992714	0.960881
NAE 28:7	0.0073335	0.0177337	0.906123	-0.600376	1.19947	1.08769	7.79676e-12	7.2618e-09	1.91736	0.962121	0.0242556	0.0484789	0.280263	0.387793	0.412176	-0.537873	0.978349	1.10531
DG 34:1	9.51622e-08	1.12191e-06	1.21735	-0.418697	1.95121	1.00554	0.000372673	0.00114988	0.707925	0.241165	0.712966	1.06444	0.000536799	0.00199553	0.627639	0.678972	0.882182	0.808019
DG 36:1	1.00596e-09	2.54138e-08	1.35627	-0.492939	2.82969	1.23905	0.00142278	0.00385061	0.453771	0.105079	0.737391	1.13625	0.120776	0.20269	0.179521	0.53914	0.94264	0.956505
DG 36:2	2.19063e-11	1.19935e-09	1.53584	-0.639149	2.82644	1.20727	0.110318	0.17893	0.260907	0.00878362	0.82936	1.14576	0.880819	0.921396	0.0231304	0.509506	1.05108	0.901892
DG 36:3	2.36238e-09	4.99355e-08	1.40077	-0.563952	2.13044	1.05249	0.0576232	0.103766	0.368777	0.0875554	0.79201	1.16279	0.0749166	0.136225	0.49152	0.280366	1.01789	1.18453
DG 38:3	3.63043e-14	1.81545e-11	1.35089	-0.492499	6.36471	1.49579	0.0011416	0.00312596	0.227285	-0.0266807	0.800536	1.20477	1.29662e-05	0.000104336	0.48149	0.319175	1.17596	1.40362
DG 38:4	3.89688e-14	1.81545e-11	1.40123	-0.519002	11.0912	2.4475	0.52259	0.615862	0.0399713	-0.125454	0.912729	1.2289	1.43739e-05	0.000110797	0.85498	0.178011	1.49537	1.74271
DG 40:5	1.6398e-13	4.87844e-11	1.40464	-0.526946	7.50074	1.70154	0.155845	0.237465	0.106606	-0.198139	0.968678	1.31994	0.000116062	0.000610147	0.694874	0.244375	1.37151	1.39698
DG 40:6	2.61902e-13	4.87844e-11	1.36011	-0.497488	7.82164	1.6491	0.0153567	0.0322007	0.172384	-0.23847	1.02504	1.35148	0.000108297	0.000581202	0.637228	0.270479	1.39871	1.32427
DG 42:1	0.000923931	0.00291608	0.837713	-0.174411	1.44343	1.08611	0.1595	0.241454	0.22228	-0.042026	0.884353	1.04196	0.00105388	0.00358089	0.511483	0.64961	0.927278	0.745199
DG O-42:1	0.0227838	0.0472422	1.06087	-0.594016	1.17587	1.18775	7.96189e-05	0.00031269	1.11259	-0.462779	1.11086	1.35907	0.00216007	0.00648717	1.42222	-0.864321	1.14626	1.15414
TG 48:0	0.0125799	0.0278854	1.1108	0.467963	0.856836	0.962603	0.63942	0.717229	0.180331	-0.122832	1.06869	0.95946	0.069442	0.128378	0.574765	-0.696449	1.0088	1.07241
TG 49:0	0.023209	0.0479104	1.08703	0.475543	0.814283	0.879792	0.630179	0.710862	0.160122	-0.0197513	1.05024	0.980604	0.00243437	0.00717216	0.889144	-0.779785	1.03755	1.13923
TG 50:0	0.00077468	0.0025053	1.51604	0.720679	0.732273	0.794702	0.240732	0.337025	0.367018	0.278291	0.969844	0.975571	0.00198307	0.0060932	0.818708	-0.762785	0.994648	1.1657
TG 50:2	0.0133658	0.0292102	0.585021	-0.493917	1.14153	1.14993	0.119364	0.190942	0.320714	-0.0674735	1.19205	0.970377	0.00112529	0.00380963	0.7637	-0.72795	1.20083	1.08448
TG 51:0	0.0125735	0.0278854	1.264	0.636055	0.707912	0.707462	0.404449	0.511554	0.393988	0.204889	0.977793	0.979198	0.000309097	0.00129004	1.14779	-0.829612	1.00465	1.22762
TG 52:0	0.000161875	0.000673312	1.61737	0.770556	0.691651	0.751601	0.00477104	0.0115092	0.840643	0.521172	0.929751	0.932792	0.000455439	0.0017577	0.97543	-0.797583	1.02203	1.18052
TG 52:5	0.000327282	0.00123254	0.644184	-0.531974	1.27689	1.14902	0.379165	0.487573	0.199339	-0.0354149	1.24352	0.908196	1.09804e-05	9.14375e-05	1.25132	-0.869071	1.35916	1.25217
TG 52:6	0.00138995	0.00412116	0.574646	-0.520964	1.17371	1.26669	0.603278	0.687378	0.0900402	0.144903	1.21135	0.857258	3.58261e-05	0.000233076	0.862866	-0.769388	1.39357	1.2113
TG 53:5	9.20651e-05	0.000420319	0.762233	-0.598813	1.25603	1.20471	0.324862	0.429612	0.20495	-0.0323519	1.21237	0.928767	4.97552e-06	4.8804e-05	1.26635	-0.874631	1.34553	1.28287
TG 53:6	4.02598e-06	2.821e-05	0.663909	-0.559257	1.27609	1.25363	0.302043	0.405191	0.176721	0.174477	1.16879	0.84035	1.3195e-05	0.000105036	0.960292	-0.797526	1.36121	1.26373
TG 54:5	0.00124357	0.00375897	0.703556	-0.577805	1.16805	1.22006	0.961781	0.97434	0.00836909	0.0888879	1.15914	0.903542	1.44293e-05	0.000110797	1.09997	-0.840879	1.27646	1.28386
TG 54:7	1.68138e-05	9.47927e-05	0.814428	-0.630136	1.31969	1.35305	0.136548	0.211524	0.231371	0.223098	1.12222	0.841368	7.08525e-05	0.000409755	0.791785	-0.747841	1.31576	1.17172
TG 55:4	6.43086e-05	0.000311788	0.807745	-0.611462	1.27331	1.28844	0.287505	0.389052	0.151505	0.195791	1.07154	0.901103	2.54968e-06	2.8603e-05	1.06327	-0.831496	1.32209	1.2753
TG 55:5	0.00030034	0.00115413	0.6407	-0.551383	1.18414	1.25875	0.763966	0.815365	0.0455083	0.140087	1.12949	0.91157	2.48898e-06	2.82706e-05	1.07522	-0.836717	1.35366	1.38134
TG 55:7	4.33422e-05	0.00022272	0.72992	-0.587566	1.32764	1.33545	0.267151	0.367382	0.19678	0.192725	1.1376	0.844193	0.000148658	0.0007301	0.883202	-0.775043	1.39691	1.2386
TG 56:0	0.0113789	0.0256508	1.25651	0.694966	0.752446	0.55582	0.197719	0.283194	0.330469	0.0522459	0.958916	0.955527	0.161775	0.250603	0.499435	0.575833	0.95038	0.940902
TG 56:3	1.36917e-05	8.17609e-05	1.09845	-0.735309	1.29123	1.48454	0.275072	0.376269	0.155018	0.208328	0.990047	0.943345	0.000193555	0.000894129	0.775634	-0.751621	1.20483	1.17585
TG 56:4	1.16051e-05	7.19973e-05	1.02232	-0.703156	1.41078	1.46686	0.124448	0.197042	0.20737	0.238222	0.985752	0.91741	2.17217e-06	2.60203e-05	0.982667	-0.815936	1.26331	1.36118
TG 56:5	0.000153649	0.000654676	0.677611	-0.573009	1.1561	1.31516	0.094027	0.156949	0.214097	0.229724	1.0604	0.874972	6.20886e-07	9.32502e-06	1.01607	-0.824222	1.32932	1.40121
TG 56:6	0.0020105	0.00570662	0.546703	-0.511188	1.1526	1.25043	0.152556	0.232835	0.201764	0.219025	1.07913	0.868786	1.8387e-05	0.000139278	0.877419	-0.785001	1.29488	1.33257
TG 56:7	0.000388882	0.00139292	0.709151	-0.582877	1.22128	1.39989	0.0405906	0.0761892	0.291671	0.253852	1.05525	0.831422	0.000884404	0.00305949	0.615718	-0.700736	1.28699	1.17518
TG 56:8	3.19869e-05	0.000167371	0.768109	-0.59987	1.34961	1.27119	0.0858411	0.146639	0.301012	0.247984	1.08081	0.838638	7.245e-05	0.000411002	0.984136	-0.809041	1.32572	1.26414
TG 57:4	1.40983e-05	8.30829e-05	0.970527	-0.685322	1.36429	1.50473	0.314174	0.418449	0.142734	0.212177	0.972535	0.943445	0.000244656	0.00106091	0.858886	-0.769728	1.28272	1.29775
TG 57:6	6.93169e-05	0.000329175	0.666292	-0.56916	1.18764	1.34771	0.114736	0.184809	0.20258	0.234291	1.10044	0.857121	8.0043e-06	7.13767e-05	0.830853	-0.767687	1.32625	1.2969
TG 58:1	0.0170308	0.0362829	1.14879	0.69152	0.797985	0.764116	0.851298	0.88554	0.0508652	-0.152349	0.998679	0.99008	0.799071	0.84924	0.0978465	0.217872	0.946577	1.07675
TG 58:4	1.66174e-05	9.42354e-05	1.06719	-0.720883	1.31337	1.45165	0.196958	0.282975	0.245221	0.24246	0.934541	0.933702	1.60566e-06	2.0533e-05	1.03317	-0.830127	1.22624	1.3865
TG 58:5	1.99369e-05	0.000108982	1.01007	-0.706043	1.26997	1.47102	0.697179	0.763216	0.0640588	0.170622	1.04102	0.949329	8.41871e-07	1.22485e-05	1.10114	-0.847507	1.26745	1.51244
TG 58:6	5.16384e-06	3.48113e-05	0.84442	-0.648187	1.23994	1.53263	0.0427297	0.0792457	0.235128	0.250198	1.01259	0.871929	6.23505e-06	5.98911e-05	0.833688	-0.773115	1.33484	1.3383
TG 58:7-1	7.30327e-05	0.000343247	0.68668	-0.579924	1.26799	1.42507	0.0192285	0.0391477	0.266084	0.264938	1.00927	0.848857	5.91005e-05	0.000357286	0.654619	-0.718744	1.29863	1.25884
TG 58:7-2	1.9317e-05	0.000107595	0.782212	-0.623903	1.22084	1.5449	0.00439293	0.0107911	0.33686	0.299054	0.928742	0.837619	3.10268e-05	0.00020615	0.720348	-0.738527	1.34484	1.28556
TG 58:8	3.78595e-05	0.000196027	0.818578	-0.634254	1.31963	1.56409	0.0038316	0.00958929	0.357842	0.295793	0.974709	0.813364	0.000763927	0.00269426	0.592612	-0.696518	1.30282	1.20673
TG 60:1	0.00492512	0.0123927	1.0467	0.697266	0.799741	0.80137	0.833501	0.871899	0.046661	-0.17778	0.992159	1.02558	0.779462	0.831247	0.0820507	0.318904	0.94981	1.08419
TG 60:11	0.00196631	0.00561543	0.561591	-0.514129	1.3454	1.27717	0.0117732	0.0256094	0.44456	0.340815	0.990865	0.770035	0.000235006	0.00104572	0.865153	-0.782738	1.36228	1.414
TG 60:6	0.00896343	0.0209147	0.645567	-0.532714	1.06204	1.30468	0.0820658	0.140965	0.262227	0.268599	0.919532	0.925714	0.00016787	0.000802092	1.00843	-0.794873	1.186	1.57754
TG 60:8	2.57336e-06	1.89894e-05	0.876066	-0.663835	1.325	1.52732	0.000605582	0.00176861	0.412035	0.350413	0.983339	0.803292	9.09358e-05	0.000500757	0.780232	-0.761043	1.23984	1.37208
TG 62:1	0.0110796	0.0251587	0.849396	0.625684	0.834693	0.848131	0.489564	0.590394	0.10597	-0.0882881	0.967891	1.00708	0.735134	0.793979	0.0659824	0.435852	0.955177	1.04361
TG 62:11	1.59792e-06	1.29216e-05	1.16109	-0.766396	1.56853	1.85531	0.0199379	0.0404406	0.311365	0.293735	0.821356	0.908598	2.43517e-05	0.000169525	1.11078	-0.842845	1.44402	1.58255
TG O-50:2	0.00225031	0.00631036	0.880697	-0.628886	1.05717	1.368	0.14837	0.227941	0.22899	0.0123141	1.05585	1.05568	0.00023306	0.0010429	0.79779	-0.751768	1.17088	1.1719
TG O-51:0	0.0203432	0.0425606	1.01258	0.657451	0.85597	0.868325	0.197309	0.283042	0.487166	-0.299695	0.944004	1.1455	0.00134146	0.00433646	1.33105	-0.633011	0.967169	1.3062
TG O-51:2	0.00641456	0.0156847	0.855164	-0.609641	1.04066	1.302	0.280212	0.381958	0.17119	0.0534115	0.97267	1.08586	0.000515944	0.0019293	0.839077	-0.765007	1.14049	1.16668
TG O-52:0	0.00480203	0.0121817	1.0445	0.690824	0.836865	0.859572	0.997237	0.99831	0.00114505	-0.0645468	0.916273	1.10104	0.0529773	0.101695	0.829156	-0.302778	0.932464	1.22794
TG O-52:2	0.00983276	0.0227154	0.845364	-0.602547	1.03974	1.28713	0.0275177	0.0540498	0.387227	-0.0701351	1.03399	1.12433	0.000256899	0.00109756	0.915455	-0.788673	1.13163	1.21258
TG O-52:3	0.00278575	0.00762805	0.833601	-0.613239	1.0453	1.34471	0.800267	0.84761	0.0314626	0.121701	0.963225	1.03647	2.1845e-06	2.60203e-05	0.971839	-0.813073	1.15408	1.34612
TG O-53:0	0.00881172	0.0206123	1.21264	0.723	0.830515	0.844544	0.383678	0.492016	0.327598	0.167666	0.914154	1.05627	0.0875483	0.153788	0.744897	-0.428986	0.939089	1.15686
TG O-53:4	0.00475327	0.012091	0.872068	-0.633061	1.03607	1.30604	0.853547	0.886889	0.0262074	0.137532	0.890545	1.08692	1.9442e-07	4.20033e-06	1.18163	-0.859018	1.13645	1.58901
TG O-54:0	0.0015885	0.00466026	1.44739	0.801076	0.792927	0.810901	0.0546128	0.0991169	0.90746	0.516785	0.885966	0.998664	0.96307	0.978841	0.0302537	-0.027307	0.963088	1.04209
TG O-54:3	0.00810809	0.019159	0.895857	-0.616166	1.03441	1.28065	0.134908	0.209331	0.245768	0.00375569	0.974653	1.10803	3.58699e-06	3.71366e-05	1.14763	-0.854643	1.13567	1.36606
TG O-55:0	0.000799913	0.00257716	1.52821	0.825994	0.780466	0.785395	0.286518	0.388469	0.514974	0.331165	0.89763	1.03372	0.516195	0.62251	0.408393	-0.291671	0.964068	1.08258
TG O-56:0	0.000704686	0.00231111	1.55684	0.803348	0.781997	0.736166	0.0863677	0.146999	0.881666	0.534819	0.867636	0.969728	0.569181	0.662384	0.395377	0.219368	0.977826	0.971733
TG O-56:1	0.0119168	0.026776	1.17327	0.645024	0.807641	0.920908	0.542445	0.632852	0.293499	0.16887	0.939212	1.02632	0.113991	0.194727	0.697794	-0.646284	0.960206	1.12938
TG O-56:7	0.000811891	0.00258895	0.965213	-0.683984	1.02057	1.45681	0.255212	0.354101	0.167343	0.20972	0.903936	0.991589	9.84087e-07	1.38804e-05	1.14791	-0.85505	1.22746	1.42551
TG O-57:0	0.00315044	0.00842816	1.42592	0.722699	0.79649	0.751138	0.0359777	0.0686377	1.03524	0.638225	0.849637	0.944532	0.551234	0.652925	0.403144	0.204761	0.999524	0.942912
TG O-57:1	0.00603779	0.0149898	1.20741	0.695166	0.804022	0.895291	0.447345	0.550897	0.368867	0.164806	0.919848	1.03808	0.0306533	0.0638339	1.0336	-0.658164	0.969781	1.17527
TG O-58:1	0.00211171	0.00597569	1.35152	0.760734	0.820153	0.877319	0.426461	0.5328	0.399559	0.169545	0.935376	1.02598	0.0466183	0.0911799	0.97335	-0.614811	0.97043	1.14246
TG O-59:1	0.0137336	0.0299368	1.07869	0.671779	0.847013	0.902253	0.0958521	0.159354	0.733727	0.357997	0.893367	1.02134	0.166259	0.255847	0.746865	-0.383442	0.962231	1.12111
BMP 40:7	5.10015e-05	0.000255274	1.64165	0.819503	0.781123	0.616409	0.0982549	0.162478	0.760838	0.425585	0.883093	1.0092	0.120085	0.202535	0.642991	0.602943	0.993378	0.896437
BMP 44:11	1.68717e-06	1.33338e-05	1.69356	0.782789	0.716609	0.570978	6.8193e-06	4.01862e-05	1.71377	-0.959484	1.39866	1.26692	1.12278e-05	9.22761e-05	1.71962	-0.883589	1.04398	1.191
BMP 44:12	1.36492e-06	1.1205e-05	1.78467	0.890067	0.723487	0.580091	3.72068e-05	0.000162272	1.36272	0.690156	0.835518	0.964026	0.00666333	0.0166315	1.03261	-0.151373	0.986755	1.11777
HBMP 56:7	4.86479e-07	4.6646e-06	1.72525	0.955	0.747558	0.7188	0.000100802	0.000376124	1.50447	-0.773481	1.1413	1.27498	0.164955	0.25426	0.456266	0.258599	1.12055	0.971372
HBMP 58:7	2.50112e-07	2.64489e-06	1.60848	0.910144	0.717051	0.703962	0.00107753	0.00297348	1.20004	-0.69969	1.09873	1.26079	0.289093	0.39697	0.301224	0.339247	1.09966	0.966218
HBMP 58:8	2.75582e-09	5.46715e-08	1.85942	0.977378	0.648397	0.643108	0.00031862	0.000999963	1.46379	-0.717789	1.08052	1.27811	0.20111	0.299574	0.470161	0.240116	1.08012	0.992287
HBMP 60:12	2.34393e-06	1.78569e-05	1.74364	0.942374	0.805013	0.687946	0.626731	0.708115	0.216358	-0.136086	0.93837	1.11435	0.00836214	0.0201688	1.36151	-0.279954	1.09586	1.17162
HBMP 62:12	3.28049e-08	4.42562e-07	1.78808	0.963956	0.711402	0.640136	0.337964	0.444413	0.294717	0.0310688	0.938446	1.00762	0.00508922	0.0132793	0.873778	0.107834	1.11981	1.07324
HBMP 62:13	1.71806e-11	1.11099e-09	1.87598	0.984811	0.581951	0.529459	0.728949	0.792817	0.104858	0.0507452	0.854525	1.15797	0.0605589	0.11413	0.656583	0.129965	1.01755	1.11081
HBMP 64:16	3.66429e-12	3.40746e-10	1.88505	0.986289	0.569383	0.478197	0.00298538	0.00767787	0.970509	0.446788	0.725342	1.04053	0.0532128	0.101936	0.570257	0.171893	0.999148	1.14016
LPA 16:0	2.98822e-05	0.000158164	1.17731	0.781711	0.856876	0.418645	2.79821e-07	3.9638e-06	1.1832	0.559403	0.365341	0.915433	1.31906e-06	1.73087e-05	1.34825	0.642675	0.390893	1.06697
LPC 20:0	0.0002585	0.00101779	0.969026	0.669448	0.856452	0.85579	0.000124137	0.00044573	0.95104	-0.632614	1.24825	1.14372	0.00013608	0.00069319	1.087	0.0424567	1.14228	1.14301
LPC 20:1	0.00269497	0.00740123	0.887927	0.59019	0.78218	0.939341	1.4515e-05	7.41731e-05	1.51795	-0.875636	1.44423	1.36133	0.00113528	0.0038157	1.20904	-0.032857	1.22622	1.09836
LPC 20:4	0.00283523	0.00774077	1.34146	-0.554347	1.35217	1.26449	5.52688e-08	1.43012e-06	1.86621	-0.977206	3.98245	4.44661	0.0603116	0.113895	1.09925	-0.194764	1.65815	1.22771
LPC 20:5	0.000450634	0.00156436	1.5594	-0.697752	1.29024	1.29714	2.14785e-08	8.92208e-07	1.8725	-0.95003	2.53342	2.9494	0.117538	0.19896	0.974236	-0.198729	1.47448	1.12631
LPC 22:0	1.20269e-09	2.86462e-08	1.75113	0.959485	0.807602	0.725634	1.32241e-06	1.04146e-05	1.32091	-0.768906	1.30705	1.20409	7.20408e-05	0.000411002	1.29785	-0.0364033	1.18149	1.11982
LPC 22:1	0.000262345	0.00102921	1.48279	0.693404	0.810229	0.940013	8.73302e-07	8.12763e-06	1.70529	-0.947198	1.53509	1.23241	1.88769e-07	4.1895e-06	2.00779	-0.528	1.36941	1.09837
LPC 22:5	0.00575538	0.0143269	1.30264	-0.559339	1.17304	1.13175	1.47352e-07	2.48831e-06	1.80557	-0.977314	2.80315	2.44305	0.000230248	0.00103947	1.81949	-0.450152	1.47738	1.27873
LPC 22:6	0.00131541	0.00395726	1.13134	-0.377691	1.18447	1.21769	1.00156e-07	1.9e-06	1.79738	-0.977517	2.66787	2.56603	0.0024067	0.00711815	1.47845	-0.263468	1.56911	1.28959
LPC 24:0	1.18902e-09	2.86462e-08	1.85818	0.95796	0.726798	0.563962	1.94421e-08	8.92208e-07	1.65901	-0.940102	1.68811	1.57835	0.000382714	0.00153036	0.956971	0.120153	1.1634	1.07322
LPC 24:1	2.01679e-09	4.47767e-08	1.89849	0.968375	0.745991	0.720232	2.21902e-08	8.92208e-07	1.48305	-0.858559	1.43488	1.17998	0.000110005	0.000588563	1.24918	-0.0322122	1.24138	1.02661
LPC 26:1	2.17015e-10	7.03066e-09	1.89367	0.929045	0.743252	0.632278	1.64485e-09	3.05368e-07	1.78936	-0.979311	1.79626	1.58039	1.84751e-05	0.000139278	1.34409	-0.0652865	1.23366	1.04854
LPC O-15:1	0.00108522	0.00333445	1.1087	-0.35137	1.19124	1.32274	0.00010465	0.000386383	1.3463	-0.817303	1.3873	1.31976	0.625625	0.706009	0.19775	0.441029	0.993174	0.956065
LPC O-18:0	1.97781e-05	0.000108982	1.04241	0.677321	0.692666	0.848867	0.00270409	0.00707166	0.922149	-0.604161	1.15128	1.21248	0.67463	0.747715	0.116219	0.376461	0.985924	1.05065
LPC O-18:1-2	1.22567e-06	1.03165e-05	1.23522	-0.425862	1.15934	1.26099	0.0758961	0.131337	0.347899	0.0444722	0.941888	1.00709	0.179926	0.273265	0.359336	0.576923	0.962415	0.986865
LPC O-18:2	0.000277064	0.00107453	1.02997	-0.335923	1.07648	1.29818	0.896872	0.92162	0.0503005	-0.106494	0.992561	0.998813	0.560432	0.658788	0.258448	0.270699	1.01845	1.01862
LPC O-20:0	1.18575e-06	1.00717e-05	1.2138	0.772616	0.78799	0.794975	8.00704e-05	0.000313332	1.21273	-0.742278	1.17399	1.29693	0.021968	0.047125	0.605783	0.200664	1.0252	1.11998
LPC O-22:0	2.52051e-11	1.3034e-09	1.73465	0.955	0.657663	0.580554	1.35063e-07	2.41702e-06	1.49513	-0.846229	1.20893	1.47671	0.000503949	0.00189954	0.768682	0.153723	1.04473	1.16316
LPC O-24:0	1.76991e-08	2.71669e-07	1.77698	0.957953	0.680226	0.603273	3.89203e-05	0.000168446	1.16511	-0.614662	1.01065	1.30834	0.709916	0.774833	0.104017	0.497277	0.971483	1.01275
LPC O-24:1	7.70702e-10	1.99389e-08	1.7705	0.951452	0.583581	0.524237	8.4413e-09	7.14331e-07	1.55686	-0.877277	1.28696	1.51735	0.028865	0.0603895	0.399799	0.344883	1.05994	1.05224
LPE 16:0	1.41152e-08	2.303e-07	1.24101	0.786615	0.630547	0.609105	1.03539e-05	5.66222e-05	1.6884	-0.949498	2.86461	3.95961	0.22206	0.325572	0.314673	0.519403	0.900032	0.97945
LPE 17:0	9.01437e-07	7.6957e-06	1.28512	0.805468	0.638586	0.570389	0.000252891	0.000817858	1.24002	-0.772653	1.49115	1.82698	0.0831179	0.147396	0.383426	0.549479	0.862116	1.01625
LPE 18:0	5.2564e-07	4.94653e-06	1.34025	0.8339	0.68415	0.615031	0.161846	0.243423	0.362095	-0.346373	1.09739	1.11674	0.148323	0.235245	0.314579	0.539101	0.894655	1.02397
LPE 18:1	0.00103005	0.00320727	0.634914	0.534106	0.816637	0.840567	1.02514e-06	9.04897e-06	1.78214	-0.979793	6.43622	8.4684	0.386465	0.496544	0.309505	0.482192	0.926072	0.925791
LPE 24:0	1.39263e-05	8.24261e-05	1.74668	0.836055	0.688299	0.690958	0.00233896	0.00616876	1.29546	-0.747048	1.40562	1.10208	0.813626	0.86078	0.126865	0.173244	1.1463	0.88777
LPE O-16:1	1.5824e-05	9.08012e-05	1.00688	0.683483	0.769433	0.795822	7.73302e-07	7.71674e-06	1.55202	0.788349	0.506938	0.737149	0.579367	0.669381	0.127215	0.498045	0.948709	1.02969
LPE O-18:1	4.05474e-08	5.27567e-07	1.28111	0.806632	0.794657	0.749176	1.00348e-06	9.03883e-06	1.50732	0.756113	0.611634	0.784541	0.0720264	0.132261	0.492614	0.620952	0.917113	0.961958
LPE O-18:2	0.000304943	0.00116854	0.947116	0.649953	0.803447	0.817898	0.122045	0.193898	0.425549	-0.289792	1.02798	1.1452	0.522024	0.627103	0.189681	0.516484	0.955931	0.996154
LPE O-19:1	0.000159965	0.000670991	0.975484	0.675124	0.893335	0.904101	4.57998e-05	0.000190356	1.39827	0.682107	0.807882	0.850707	0.00764766	0.0187368	0.828998	0.765276	0.957726	0.872819
LPG 22:6	0.009004	0.0209568	1.30933	0.687322	0.630429	0.656618	0.0135619	0.0291597	1.09246	0.616478	0.662004	0.933805	0.39702	0.507031	0.596744	0.198587	0.911995	0.907668
PC 26:0	0.00232637	0.00644599	0.633721	0.546056	0.927596	0.706959	1.18902e-06	9.96912e-06	0.913856	-0.625896	1.75549	1.28937	0.00019578	0.000898897	0.716656	0.722826	0.871547	0.634199
PC 28:1	8.31262e-06	5.29905e-05	1.54426	0.893655	0.869695	0.771709	0.00295117	0.00761091	0.644086	-0.506469	1.10844	1.04939	1.8602e-05	0.000139278	1.43477	0.884339	0.871585	0.832189
PC 29:0	0.0137626	0.0299368	0.701396	0.536568	0.960396	0.946043	0.000101691	0.000378335	1.12063	-0.689018	1.05791	1.10352	9.20468e-06	8.00486e-05	1.34987	0.895936	0.926394	0.874461
PC 29:1	0.0140889	0.0305753	0.570222	0.512003	0.957806	0.855473	0.0162423	0.033829	0.381467	-0.348853	1.10815	1.03955	2.10753e-07	4.36536e-06	1.19505	0.860062	0.859331	0.620372
PC 30:0	2.2066e-06	1.70042e-05	1.37725	0.825577	0.946795	0.908957	1.9116e-05	9.21352e-05	0.631896	-0.464435	1.07821	1.00927	0.000594336	0.00217722	0.910452	0.786901	0.976507	0.924121
PC 31:0	1.7821e-08	2.71669e-07	1.40878	0.866664	0.909907	0.883742	0.00635446	0.0148271	0.42522	-0.344351	1.01853	1.03336	0.232709	0.338519	0.237387	0.551693	0.978621	1.00128
PC 32:0	1.12002e-07	1.28731e-06	1.33976	0.831957	0.899016	0.887863	0.264459	0.364218	0.121018	-0.239795	1.02654	0.989255	0.00418773	0.0116035	0.576622	0.194487	0.997042	1.05594
PC 32:1	1.97412e-05	0.000108982	1.08214	0.700013	0.971897	0.980731	7.28882e-05	0.000292086	1.17778	-0.66415	1.02915	1.02511	2.50257e-09	2.12437e-07	1.60248	0.941346	0.970144	0.898093
PC 33:0	1.2822e-05	7.73818e-05	1.31982	0.822363	0.921692	0.915291	0.163568	0.24522	0.263958	-0.282913	0.998087	1.02504	0.000505804	0.00189954	1.15997	-0.102203	1.01405	1.06804
PC 33:1	0.00340956	0.00904359	1.25528	0.709361	0.977486	0.960603	0.0111539	0.0244336	0.972517	-0.473204	1.00313	1.03098	1.07298e-06	1.45722e-05	1.77939	0.963481	0.960911	0.936253
PC 34:0	7.47956e-05	0.000348194	1.27522	0.782592	0.904794	0.938575	0.089772	0.151142	0.709827	0.269523	0.946537	1.00462	3.55499e-06	3.71354e-05	1.85632	-0.790929	1.02761	1.18322
PC 34:2	0.00474866	0.012091	0.877524	0.577518	0.957762	0.992626	0.429623	0.534578	0.365199	-0.0380614	0.987278	1.02581	0.00506471	0.0132793	1.4691	0.772035	0.972043	0.959079
PC 34:4	2.6267e-05	0.00014072	1.41596	-0.852801	1.1931	1.14708	0.000260803	0.000835021	0.642675	0.46558	0.834829	1.00736	0.000376657	0.00151689	0.862015	-0.13758	0.873276	0.987565
PC 34:5	0.0015918	0.00466026	1.00375	-0.673897	1.1027	1.06678	6.16444e-07	6.517e-06	1.18782	0.729549	0.78771	0.926416	0.000236059	0.00104572	1.29517	0.0770664	0.879916	0.939727
PC 35:4	0.000139366	0.000601902	0.904305	-0.666623	1.15159	1.10794	0.00933468	0.0208908	0.39998	0.373055	0.873264	1.0001	0.0215244	0.0464946	0.371135	-0.613236	0.939365	1.14215
PC 35:5	0.000924221	0.00291608	1.01602	-0.717683	1.13104	1.21152	0.126173	0.199096	0.267383	0.255985	0.899294	0.998951	0.521972	0.627103	0.11213	-0.512303	0.903981	1.10545
PC 36:0	0.00302459	0.00813843	0.843507	0.600676	0.898003	0.940578	0.0243489	0.0488552	0.610969	0.161405	0.93083	0.994131	0.0034769	0.00985458	1.0445	-0.0240245	1.03037	1.09341
PC 36:3	0.00763799	0.0183272	0.876455	0.214915	0.978546	0.963307	5.84514e-05	0.000238875	0.759769	0.553698	0.920595	0.999755	0.949516	0.970362	0.0132935	-0.462701	0.961355	1.03609
PC 36:4-2	2.43261e-05	0.000130771	0.789313	-0.613523	1.08034	1.05979	1.44299e-07	2.48831e-06	0.842616	0.576391	0.895327	0.945482	0.000184823	0.000865503	0.532473	-0.681529	0.991385	1.09218
PC 36:6	0.00012485	0.00055154	1.55446	-0.87603	1.16388	1.17716	0.00501167	0.0119945	0.664358	0.474444	0.857947	1.00701	0.00124347	0.00407632	1.15789	0.0385585	0.868133	0.967972
PC 37:2	0.022003	0.0457249	0.391299	0.0501051	1.01469	1.01023	0.0800646	0.138293	0.390446	-0.313323	0.991387	1.03021	5.665e-06	5.48902e-05	1.19351	0.847291	0.970793	0.937808
PC 37:4-1	0.00232485	0.00644599	1.08421	0.360411	0.886417	0.997009	4.29201e-07	5.187e-06	1.33733	0.789741	0.82919	0.896101	0.57618	0.667194	0.106084	-0.454135	0.961453	1.02263
PC 37:4-2	0.00034386	0.00126088	0.81094	-0.633451	1.06017	1.06223	3.71621e-07	4.73049e-06	0.730005	0.520086	0.879395	0.9733	0.00027835	0.00117533	0.760802	-0.728417	0.997503	1.13746
PC 37:5	0.00400161	0.0104064	1.30832	-0.781845	1.04386	1.04828	3.39596e-08	1.16375e-06	1.48687	0.873992	0.817844	0.931932	0.992225	0.997583	0.00241659	-0.446531	0.923576	1.07465
PC 37:6	0.000449372	0.00156436	1.54201	-0.849441	1.11607	1.16147	0.00475457	0.0115092	0.633059	0.469009	0.871552	1.01813	0.00372533	0.0104466	0.819757	-0.142037	0.88468	1.01148
PC 38:2	0.00359744	0.00946107	1.35102	-0.602716	1.02422	1.04008	0.0211427	0.0426981	1.16459	-0.660563	1.03132	1.02489	0.000422035	0.00166475	1.34878	0.789425	0.994938	0.920084
PC 38:3	3.86321e-06	2.72247e-05	1.6822	-0.917249	1.07292	1.06046	2.30736e-05	0.000107531	1.53704	0.833657	0.95505	0.961341	4.25311e-06	4.20931e-05	1.83898	-0.922429	1.03744	1.06549
PC 38:4	6.30236e-07	5.75029e-06	1.36708	-0.834889	1.15458	1.13347	4.25799e-06	2.73521e-05	0.896409	0.601318	0.91121	0.94428	3.91898e-08	1.31005e-06	1.25355	-0.873943	1.05737	1.18281
PC 38:5	0.00473354	0.012091	0.642714	-0.549035	1.05434	1.02129	5.16024e-08	1.41512e-06	1.18171	0.73426	0.898174	0.941088	0.015823	0.0356687	0.384221	-0.623548	0.978769	1.06028
PC 38:6	0.000433847	0.00153051	1.43001	-0.622543	1.06583	1.05718	1.26143e-05	6.7032e-05	1.61057	0.876143	0.893915	0.95988	0.0844338	0.149445	0.908827	0.263196	0.933767	1.01733
PC 38:7	1.37263e-05	8.17609e-05	1.54664	-0.650741	1.19095	1.19478	5.17719e-08	1.41512e-06	1.68475	0.841782	0.771282	0.908077	3.04864e-05	0.000204284	1.82477	0.707982	0.82439	0.956562
PC 39:4	0.000810011	0.00258895	1.3303	-0.78275	1.11504	1.15443	0.00878054	0.0198897	0.956975	0.570403	0.895463	0.927056	0.0802413	0.143663	0.770576	-0.663236	1.04053	1.06272
PC 39:5	0.0169064	0.0361007	1.07568	-0.647008	1.04688	1.01393	7.31998e-06	4.20674e-05	1.33318	0.767918	0.885298	0.974842	8.71144e-05	0.000482679	1.36648	-0.814149	1.00539	1.10861
PC 39:6	0.00612818	0.0151335	1.31393	-0.694958	1.06437	1.1201	0.583449	0.667311	0.287878	-0.0797905	1.02957	0.997705	0.138243	0.223058	0.929149	-0.517811	1.04561	1.06078
PC 39:7	0.00145275	0.0042937	1.3249	-0.565214	1.09742	1.10999	1.36089e-06	1.064e-05	1.69388	0.856967	0.830356	0.921291	0.000502988	0.00189954	1.78136	0.641898	0.854158	0.957086
PC 40:0	0.00631035	0.0155422	0.908139	0.65568	0.94764	0.829604	1.96722e-05	9.45397e-05	0.763155	-0.551091	1.19655	1.07734	0.0084001	0.020208	0.353288	0.620438	1.03683	0.83394
PC 40:10	0.000228674	0.000918961	0.293374	0.111574	1.20994	0.959282	0.00273942	0.00714398	0.152285	-0.237102	1.11295	0.97968	0.486409	0.595851	0.0464351	0.494574	0.958586	1.04905
PC 40:5	0.000156745	0.000661389	1.43728	-0.799465	1.0963	1.04631	8.89662e-05	0.0003382	1.5302	0.86901	0.948806	0.958749	5.20161e-09	3.02575e-07	2.19191	-0.955194	1.08452	1.12389
PC 40:6	1.94771e-08	2.926e-07	1.85503	-0.929115	1.21535	1.14541	1.69122e-05	8.3691e-05	1.73637	0.883752	0.944969	0.949593	6.69365e-06	6.22839e-05	2.1759	-0.855338	1.06505	1.08695
PC 40:7	1.94938e-07	2.08672e-06	1.74781	-0.951824	1.07585	1.06906	2.22475e-08	8.92208e-07	1.74779	0.949936	0.892405	0.918678	1.90225e-05	0.000140389	2.06964	0.623967	0.954243	0.940047
PC 40:8-1	0.00215033	0.00604822	0.611925	-0.0762974	1.11111	1.06485	1.30688e-06	1.04146e-05	0.936743	0.364953	0.828432	0.953658	0.000140709	0.000705758	0.939402	0.66931	0.842502	1.00434
PC 40:8-2	0.00120073	0.00365321	0.380765	0.0590554	1.191	1.01688	0.062033	0.109588	0.139109	-0.0738423	0.948367	0.966899	0.946939	0.970362	0.0098796	0.45678	0.936914	1.13114
PC 40:9-2	0.00309927	0.00831533	0.346051	0.0779189	1.20047	1.02613	0.0090738	0.0203559	0.241874	-0.0213998	0.885762	0.962381	0.267242	0.374139	0.144521	0.52061	0.905009	1.07851
PC 41:0	0.0075254	0.0181037	0.702802	0.585618	0.991504	0.830155	1.44096e-05	7.40685e-05	0.736798	-0.534564	1.16638	1.10846	0.00655506	0.0164495	0.313734	0.607427	1.02776	0.847628
PC 41:5	5.76057e-05	0.000285243	1.32691	-0.724204	1.08226	1.01176	2.19751e-05	0.000102925	1.23126	0.721604	0.921993	0.994328	1.80592e-09	2.10639e-07	1.83126	-0.906945	1.03333	1.15226
PC 42:0	0.00294684	0.00799857	0.984087	0.702329	0.958445	0.768235	1.02576e-05	5.66222e-05	0.639854	-0.472837	1.18247	1.07138	0.000403133	0.00159657	0.492446	0.662538	1.01168	0.781068
PC 42:10-2	2.83551e-06	2.06566e-05	0.897453	-0.217107	1.27751	1.13868	0.000133252	0.000469027	0.485725	0.113988	0.876735	0.947301	0.315858	0.425698	0.134691	0.486187	0.91874	1.07474
PC 42:11	0.000571827	0.0019225	0.592356	-0.0484104	1.23459	1.04392	1.18468e-06	9.96912e-06	0.859683	0.333742	0.747184	0.875097	0.00121883	0.00402386	0.598743	0.648383	0.839587	0.974689
PC 42:2	0.00174728	0.00505193	1.22017	-0.443216	1.1251	1.05595	0.000898738	0.00255173	1.03434	-0.656129	1.09996	1.07431	0.000149651	0.000731152	0.978403	0.793392	0.987441	0.827889
PC 42:6-2	0.00178152	0.00513498	0.48656	-0.0118727	1.02775	1.03485	7.94121e-07	7.71674e-06	1.16211	0.482487	0.909971	0.946751	9.37001e-06	8.01172e-05	0.940427	0.741153	0.943413	0.975603
PC 42:8-1	0.00132699	0.00397244	1.06414	0.645546	1.00205	0.85098	0.000105317	0.000386383	1.07455	0.464899	0.895981	0.9118	3.36809e-05	0.000222516	1.56999	0.747506	0.846104	0.963577
PC 43:2	0.00105899	0.00327547	1.09138	-0.341716	1.13652	1.10661	0.000143364	0.000498625	1.15977	-0.701366	1.14229	1.1416	0.000370332	0.00150424	0.75007	0.748694	0.994283	0.830927
PC 44:0	0.0100325	0.0231194	1.01467	0.645919	0.991397	0.722031	0.972301	0.981792	0.0087738	-0.123393	1.04342	0.945752	0.0246757	0.0523304	0.688757	0.697036	0.968329	0.749331
PC 44:11	4.6544e-05	0.000237865	1.20482	-0.416685	1.20162	1.07313	1.04055e-06	9.04897e-06	1.15169	0.488523	0.851846	0.924641	3.78198e-06	3.84543e-05	1.34027	0.783297	0.85415	0.959875
PC 44:12	1.93434e-06	1.49736e-05	1.37699	-0.513225	1.34814	1.27547	0.000383013	0.00117681	0.758977	0.277196	0.864335	0.948155	0.367498	0.478201	0.314752	0.480661	0.898745	1.06235
PC 44:6-1	0.00380781	0.00993018	1.31408	-0.660214	1.15901	1.0441	0.107554	0.175364	0.823202	0.351054	0.950703	0.976413	0.121157	0.20269	0.910744	0.211623	0.91132	1.0129
PC 46:5	0.00034428	0.00126088	1.01447	-0.309361	1.29852	1.00302	0.0342269	0.0659736	0.329546	-0.317043	1.02882	1.07208	0.0959926	0.167358	0.276083	0.586945	0.986004	0.936586
PC 46:6-1	0.000155058	0.000655932	1.13847	-0.366912	1.28854	1.09382	0.83329	0.871899	0.0487164	-0.130825	0.95746	1.0411	0.196602	0.293799	0.384665	0.583062	0.963996	0.931774
PC 46:7	0.0156059	0.0335546	0.849954	-0.224892	1.15028	1.03761	0.81019	0.8552	0.0755899	-0.0971648	0.968546	1.02084	0.0549101	0.104757	0.578374	0.652592	0.983555	0.875521
PC 48:5	4.93144e-05	0.00025081	1.10488	-0.346821	1.39238	1.04594	0.00113783	0.00312485	0.740547	-0.534291	1.20142	1.14788	0.0118522	0.027655	0.437716	0.637636	0.978129	0.849132
PC 48:6-1	5.17987e-07	4.921e-06	1.61887	-0.662118	1.36099	1.21993	0.00166778	0.00448758	0.763739	-0.513593	1.11886	1.07412	0.00828857	0.0200433	0.522513	0.678244	1.01454	0.848494
PC 48:7	0.000665224	0.00219544	1.39128	-0.568453	1.18809	1.09557	0.023562	0.0473785	0.85126	-0.553701	1.08895	1.07111	0.00144137	0.00460484	1.04539	0.799887	0.97302	0.80711
PC O-32:0	0.000251489	0.000998637	0.692833	0.563438	0.927508	0.968543	3.10068e-06	2.12023e-05	0.957738	-0.608138	1.03769	1.08182	0.521005	0.627103	0.124615	0.400604	0.992339	1.02042
PC O-32:1	0.000123518	0.000549733	1.50435	-0.66883	1.04226	1.08868	3.50144e-08	1.16375e-06	1.85507	-0.889124	1.06759	1.09171	1.19531e-08	5.586e-07	1.88049	0.950791	0.962044	0.885537
PC O-32:2-1	0.0124488	0.0277269	0.684405	-0.171032	1.00615	1.1049	0.526699	0.619137	0.33017	0.205066	0.970033	0.975214	0.00790652	0.0192696	1.1089	0.797499	0.964805	0.926535
PC O-32:2-2	3.54459e-05	0.00018412	1.67778	-0.878153	1.06898	1.11053	3.36648e-07	4.56055e-06	1.70433	0.961401	0.654163	0.794981	0.085705	0.151407	0.665456	-0.123643	0.95665	1.00256
PC O-34:1	2.961e-05	0.000157472	1.64695	-0.731812	1.03678	1.05991	4.57088e-09	5.31834e-07	1.88959	-0.925576	1.07305	1.08618	0.00118098	0.00392678	1.53642	0.809882	0.985871	0.944003
PC O-34:2	0.000913185	0.00290103	0.574771	-0.0511653	1.02345	1.07433	7.77536e-05	0.000306914	0.597862	-0.372291	0.971134	1.09196	7.12888e-05	0.000409755	1.14174	0.801707	0.936183	0.931024
PC O-34:3	1.18804e-05	7.28875e-05	1.57922	-0.681189	1.10561	1.19293	1.62754e-08	8.92208e-07	1.77293	0.966544	0.523044	0.737324	0.409908	0.519924	0.49951	0.116629	0.949074	1.0227
PC O-34:4	3.40755e-07	3.48869e-06	1.01429	-0.724361	1.22161	1.33721	0.00349217	0.00888309	0.32795	0.315588	0.895759	0.940773	0.0137596	0.0317084	0.330903	-0.60887	0.97067	1.14338
PC O-35:2	0.00108326	0.00333445	0.698278	-0.122945	1.01752	1.05664	2.67903e-05	0.00012291	1.01636	-0.500729	0.98601	1.08517	2.17291e-05	0.00015661	1.43026	0.892439	0.950318	0.91519
PC O-35:4	2.56708e-06	1.89894e-05	1.34271	-0.820416	1.2307	1.3191	0.0184176	0.0377576	0.384335	0.365614	0.808398	1.01247	0.00488001	0.0129808	0.515558	-0.658465	0.956865	1.19524
PC O-36:0	0.00100868	0.00315503	1.2219	0.706868	0.813896	0.918231	0.181964	0.266286	0.461044	-0.185162	0.94267	1.11693	0.154061	0.24202	0.618718	0.621999	0.990457	0.954606
PC O-36:1	0.0155691	0.0335528	0.979363	0.649712	0.938263	0.937904	3.65605e-06	2.39962e-05	1.59916	-0.794115	1.05312	1.17146	1.07458e-05	8.9745e-05	1.55355	0.90515	0.930787	0.865074
PC O-36:3	0.000105219	0.000474539	1.18667	-0.408636	1.04582	1.07812	0.0683404	0.119596	0.604909	0.29085	0.952666	1.01815	0.0212746	0.0461269	1.118	-0.322977	0.994265	1.06235
PC O-36:4	5.8721e-11	2.48408e-09	1.47952	-0.892546	1.16931	1.30886	0.000511504	0.00151324	0.333316	0.329338	0.870289	1.0115	0.00364418	0.010281	0.313667	-0.611133	0.956646	1.10799
PC O-36:5	7.59837e-08	9.18909e-07	1.27082	-0.815629	1.09688	1.22338	2.88775e-05	0.000129355	0.455908	0.382022	0.893555	0.977438	0.00662228	0.0165735	0.269105	-0.586737	0.975073	1.07431
PC O-36:6	1.50137e-11	1.07423e-09	1.32453	-0.843891	1.3854	1.58329	5.57724e-10	1.73166e-07	1.54828	0.869169	0.412109	0.503932	0.00100301	0.00343309	0.253902	-0.588874	0.962354	1.11875
PC O-36:7	1.32493e-06	1.09725e-05	1.42954	-0.871942	1.325	1.38062	3.65554e-10	1.70373e-07	1.75444	0.951015	0.318337	0.469182	0.157712	0.245418	0.221574	-0.558325	0.944054	1.10223
PC O-37:0	0.00105727	0.00327547	1.21416	0.733673	0.854174	0.912417	0.0958076	0.159354	0.577444	-0.265715	0.948641	1.12644	0.0397796	0.0803359	0.77785	0.661594	0.971489	0.959526
PC O-37:3-1	1.17181e-05	7.21371e-05	1.32273	-0.504347	1.04569	1.09295	0.00048925	0.00145916	1.39826	0.706421	0.9311	0.977352	0.182362	0.276064	0.643753	-0.265053	0.980719	1.04508
PC O-37:4	1.35449e-07	1.53274e-06	1.30422	-0.830385	1.08742	1.20214	1.47272e-05	7.43788e-05	0.696478	0.502976	0.850337	0.958249	4.17435e-05	0.0002641	0.664796	-0.724867	1.01521	1.11718
PC O-38:0	0.000173225	0.000709529	1.55906	0.833928	0.809224	0.856857	0.0050776	0.0121211	1.3198	-0.741453	1.04726	1.09016	0.000322507	0.0013365	1.04354	0.774669	1.00445	0.868862
PC O-38:1	0.0179595	0.0380006	1.0646	0.652199	0.875128	0.84331	0.0173322	0.0358585	0.998509	-0.521357	0.986487	1.30975	0.127379	0.209894	0.861158	0.524637	0.894928	0.950255
PC O-38:3-1	0.00295905	0.00800835	1.18497	-0.452678	1.04533	1.05842	0.132486	0.207051	0.719683	0.312056	0.954127	1.00169	0.590004	0.67647	0.334676	0.201601	0.970593	1.01402
PC O-38:4	5.86904e-07	5.41086e-06	1.35098	-0.841898	1.06403	1.13726	0.00646358	0.015044	0.262608	0.293344	0.902843	1.03537	0.0011431	0.00382814	0.469164	-0.65727	0.972809	1.09751
PC O-38:5-1	6.81887e-11	2.76062e-09	1.79075	-0.973952	1.20554	1.33342	0.763339	0.815365	0.0573771	0.160931	0.931647	1.07251	0.00547717	0.0140863	0.64629	-0.682507	0.999427	1.10296
PC O-38:5-2	8.19132e-08	9.7755e-07	1.07793	-0.744834	1.09274	1.19673	1.28961e-06	1.04146e-05	0.683125	0.491557	0.872112	0.926999	0.000430423	0.00168916	0.557723	-0.692853	1.01072	1.1248
PC O-38:6	2.19497e-10	7.03066e-09	1.84952	-0.977734	1.22718	1.32839	0.0229657	0.0462793	0.327847	0.346653	0.92735	1.01683	0.00859531	0.0206243	0.601498	-0.229656	0.95973	0.98228
PC O-38:7	2.5491e-08	3.59705e-07	1.41475	-0.868538	1.18259	1.1964	2.05706e-08	8.92208e-07	1.73798	0.963076	0.519906	0.623193	9.56734e-06	8.0997e-05	0.914757	-0.770758	1.05937	1.09553
PC O-39:0	0.00133588	0.00398623	1.43676	0.789225	0.822985	0.827038	0.000172173	0.000582298	1.55975	-0.864407	1.12805	1.19129	0.00505355	0.0132793	1.07444	0.770201	0.971941	0.870468
PC O-39:5	5.91766e-06	3.92869e-05	1.43618	-0.851969	1.04933	1.15783	0.130514	0.204559	0.26044	0.309347	0.936584	1.01616	0.000136683	0.00069319	0.908469	-0.791726	1.01846	1.11819
PC O-40:0	5.05217e-05	0.000254138	1.71357	0.852965	0.791844	0.80699	7.75169e-05	0.000306914	1.65548	-0.88569	1.14087	1.09831	0.000132943	0.000687906	1.12601	0.751077	1.02937	0.807007
PC O-40:1-1	0.00712725	0.017325	1.18084	0.661152	0.852041	0.944083	0.0473708	0.0873311	1.02881	-0.621436	1.05426	1.04866	3.97149e-05	0.000253155	1.32817	0.82486	0.994236	0.777699
PC O-40:1-2	1.60888e-06	1.29216e-05	1.78525	0.9273	0.794768	0.799255	6.24305e-06	3.77236e-05	1.73408	-0.878867	1.18208	1.30733	0.00535291	0.0138432	1.25303	0.790478	0.96575	0.911017
PC O-40:2	0.00131767	0.00395726	1.29148	0.752995	0.882838	0.883827	0.000640499	0.00185043	1.20735	-0.598004	0.999569	1.18055	0.000136891	0.00069319	1.37562	0.871629	0.933142	0.878441
PC O-40:3	0.00076777	0.00249132	1.03138	0.660588	0.896335	0.920689	0.459709	0.561665	0.228771	0.0276253	0.92271	1.06121	0.329024	0.440123	0.421043	0.158023	0.976992	1.06816
PC O-40:5	2.95953e-06	2.11982e-05	1.73447	-0.792898	1.08976	1.13035	0.0047718	0.0115092	1.36175	0.736411	0.934284	0.932345	0.00743922	0.0182742	1.64589	0.618914	0.925856	0.924109
PC O-40:6	1.55288e-08	2.47741e-07	1.84579	-0.875872	1.10081	1.16601	0.418298	0.525554	0.451743	-0.193576	1.01429	1.02017	0.00207443	0.00633211	1.77203	0.519303	0.965174	0.968829
PC O-40:7	1.83375e-09	4.15544e-08	1.74132	-0.96915	1.15689	1.24475	3.18645e-07	4.43267e-06	1.25994	0.767376	0.861623	0.908408	0.00483043	0.0129658	0.845066	-0.109709	0.951817	0.959158
PC O-40:8	6.90956e-05	0.000329175	1.15302	-0.746325	1.12416	1.09313	4.12514e-09	5.31834e-07	1.8335	0.989675	0.430527	0.537143	4.4513e-05	0.00027805	1.15043	-0.814306	1.05605	1.10689
PC O-41:1	0.00749647	0.0180809	1.16443	0.6918	0.857057	0.889248	0.000144773	0.000503713	1.56475	-0.883137	1.14901	1.21919	0.00202176	0.00619165	1.11438	0.79018	0.965902	0.844225
PC O-41:2	0.000162523	0.000674458	1.33403	0.807744	0.85615	0.824237	0.0010012	0.00279916	1.2101	-0.549755	1.00557	1.3288	0.000269649	0.00114781	1.17823	0.818599	0.908334	0.876594
PC O-42:1	9.55682e-06	5.9734e-05	1.76553	0.909853	0.790173	0.771392	3.12072e-06	2.12023e-05	1.76749	-0.907402	1.21051	1.31933	0.00453171	0.0123267	1.22918	0.772518	0.972896	0.877017
PC O-42:2	1.4683e-05	8.55356e-05	1.71535	0.894649	0.808545	0.810864	2.05412e-05	9.7375e-05	1.6888	-0.865235	1.15669	1.28054	0.000115722	0.000610147	1.41156	0.864434	0.959906	0.865359
PC O-42:4	0.00193144	0.00553284	1.45585	0.650512	0.887201	0.907109	0.0737339	0.128285	0.336286	0.29367	0.868215	1.06656	0.548322	0.650303	0.212849	-0.330384	0.933406	1.04321
PC O-42:5-1	0.00298564	0.00805691	1.43853	0.684682	0.913514	0.918462	0.105226	0.172779	0.544956	0.397205	0.895626	1.034	0.0952262	0.166646	0.925943	-0.566849	0.997729	1.08851
PC O-42:5-2	0.000533043	0.00180445	1.58135	0.746622	0.857969	0.864203	0.00395633	0.00987491	0.692905	0.472394	0.832723	1.04659	0.15781	0.245418	0.635095	-0.509085	0.958696	1.11589
PC O-42:7	7.82706e-05	0.000360878	1.56988	0.80205	0.937066	0.834194	2.19064e-06	1.56838e-05	1.74419	0.945303	0.632295	0.775931	1.37147e-05	0.000107965	2.02252	-0.705019	1.06371	1.17469
PC O-43:1	0.000336188	0.00125629	1.58417	0.84618	0.783719	0.745562	7.30678e-05	0.000292086	1.59667	-0.825298	1.12761	1.31035	0.0539664	0.103168	0.863903	0.674609	0.973517	0.898517
PC O-43:2	0.000148266	0.000637907	1.5379	0.852832	0.828219	0.784228	1.55417e-05	7.80027e-05	1.64165	-0.867152	1.1476	1.34649	0.00228672	0.00684547	1.11153	0.795143	0.936027	0.879515
PC O-43:4	0.000443929	0.001554	1.58737	0.769546	0.847093	0.865316	0.738954	0.799032	0.0752839	0.163237	0.902316	1.08265	0.55565	0.655355	0.305323	-0.194888	0.94356	1.02593
PC O-43:5	0.0164475	0.0352825	1.19587	0.588619	0.883975	0.928477	0.0251796	0.0503052	0.487949	0.36962	0.822513	1.08057	0.68542	0.755402	0.164292	-0.377483	0.928121	1.09063
PC O-44:1	0.00770231	0.0184254	1.28902	0.69324	0.792219	0.765598	0.00203463	0.0053967	1.35291	-0.677825	1.09086	1.34013	0.733442	0.793979	0.222473	0.25395	0.953965	1.00704
PC O-44:2	5.57881e-05	0.000277806	1.68453	0.876595	0.830966	0.808303	1.02498e-05	5.6525e-05	1.72629	-0.889588	1.17982	1.28855	0.00551999	0.0141573	1.15764	0.771276	0.977119	0.860864
PC O-44:3	3.87239e-07	3.86266e-06	1.63878	0.91183	0.821047	0.756943	0.00416684	0.0103174	0.97871	-0.623878	1.02524	1.16937	0.917849	0.951544	0.0337206	0.410944	0.981146	1.02774
PC O-44:4	0.000583182	0.00195242	1.56673	0.758062	0.867823	0.831207	5.93456e-05	0.000241084	1.14973	-0.504066	1.00742	1.25815	0.184266	0.278041	0.663368	-0.00315411	0.916754	1.03001
PC O-44:5	0.00363889	0.00953538	1.35569	0.56514	0.884611	0.924786	0.0275184	0.0540498	0.394306	0.330613	0.867885	1.0506	0.219012	0.321609	0.492047	-0.220831	0.944284	1.0063
PC O-45:5	0.000432478	0.00152925	1.58695	0.782228	0.851415	0.868454	0.215406	0.305495	0.266145	0.264454	0.857174	1.09405	0.0736434	0.134435	1.01878	0.160278	0.920857	0.997172
PC O-46:5	0.000321922	0.00121863	1.54362	0.814434	0.849561	0.857859	0.00131952	0.00358156	1.34191	-0.684266	1.04234	1.18974	0.270852	0.377621	0.641127	0.528135	0.975044	0.975825
PC O-46:6-1	0.010717	0.0244546	1.2013	0.659095	0.921346	0.929513	0.0101769	0.0226126	0.971751	0.510503	0.906478	1.01202	0.114592	0.195049	0.904366	0.637903	0.973123	0.957935
PC O-46:6-2	0.000330151	0.00123883	1.45196	0.808161	0.855962	0.841255	0.00992662	0.0221093	0.999456	-0.531662	0.9852	1.17435	0.00148345	0.00471363	1.25282	0.819803	0.930559	0.919112
PC O-47:7	0.0214855	0.0447494	1.03801	0.633366	0.921875	0.925531	0.0187318	0.0382442	0.800689	0.492979	0.832846	1.04843	0.00161705	0.0050855	1.49264	0.843838	0.92544	0.880067
PE 34:4	0.000340669	0.00126088	1.5944	0.780494	0.864013	0.837681	0.227652	0.320642	0.655529	-0.304825	1.0607	1.0182	0.73149	0.792802	0.184428	0.190171	1.09709	0.929469
PE 34:5	5.4378e-06	3.64363e-05	1.71316	0.927302	0.821127	0.747091	0.000232004	0.000757867	1.41026	-0.79387	1.16954	1.20051	0.143386	0.229948	0.62588	0.630249	0.995299	0.866354
PE 35:2	0.00486435	0.0123063	1.26045	0.704004	0.897658	0.960427	2.49688e-05	0.000115796	1.72322	-0.887245	1.15209	1.16355	0.238026	0.344637	0.640694	0.459717	1.02607	0.899405
PE 36:1	0.0086489	0.0202824	0.786998	-0.577761	1.03184	1.12664	0.0807988	0.139046	0.321997	-0.0804346	1.11231	0.951704	0.0744244	0.135595	0.785756	-0.544466	1.15903	0.975146
PE 36:5-1	0.0192775	0.0405827	1.16708	0.661319	0.826866	0.862682	0.991775	0.996275	0.0056214	-0.0235964	0.998086	1.00287	0.61644	0.699033	0.29449	0.128026	1.14076	0.933046
PE 37:1	0.00182039	0.0052308	1.10264	-0.692626	1.05702	1.15754	0.198166	0.283398	0.423018	-0.170485	1.08559	0.985988	0.0800544	0.143604	0.841171	-0.565319	1.13431	0.986322
PE 37:2	0.00230533	0.00642595	1.12834	-0.676215	1.01616	1.1243	0.0825657	0.141563	0.577664	-0.202136	1.0568	1.0091	0.570621	0.663231	0.300541	0.0378153	1.063	0.915216
PE 37:3-1	0.00781465	0.0186073	1.2834	-0.573762	1.05461	1.11442	0.867754	0.898641	0.0943834	0.0536544	0.991314	1.001	0.831266	0.877448	0.145506	0.025431	1.02622	0.983918
PE 37:4	0.00364618	0.00953538	1.26587	0.757676	0.892599	0.893852	0.192422	0.27862	0.646152	-0.383672	1.0023	1.08357	0.0882952	0.154808	1.0431	-0.207023	1.05531	1.08356
PE 38:2	7.19014e-07	6.4116e-06	1.45918	-0.85912	1.28261	1.54433	0.762309	0.815365	0.066593	0.0673658	1.09361	0.950332	0.688252	0.757403	0.137009	-0.415742	1.15161	0.918665
PE 38:3	4.07593e-08	5.27567e-07	1.69068	-0.931855	1.22714	1.37402	0.0138264	0.0295916	0.547679	0.367008	1.00548	0.920301	0.0149117	0.0341101	0.915438	-0.738024	1.0922	1.05626
PE 39:3	0.00019547	0.000792773	1.49638	-0.831558	1.64758	1.6814	0.649611	0.724296	0.213054	0.0223314	1.12682	0.975504	0.123416	0.205145	0.875776	-0.539298	1.24253	1.05715
PE 40:2	0.024328	0.0499325	0.748085	-0.548878	1.00759	1.16602	0.414992	0.523519	0.246759	-0.0491688	1.08949	0.977317	0.0817075	0.145449	0.736853	-0.634677	1.14202	1.01088
PE 40:3	4.09314e-06	2.84163e-05	1.6291	-0.89718	1.2608	1.32194	0.270163	0.370977	0.356531	0.162679	1.05793	0.906413	0.0024084	0.00711815	1.34476	-0.843953	1.13291	1.1019
PE 40:4-1	6.56928e-10	1.74762e-08	1.82035	-0.970242	1.37976	1.4901	0.158712	0.240653	0.410333	0.226829	1.04313	0.914276	0.031689	0.0654157	0.97418	-0.674648	1.1149	1.0177
PE 40:5	5.14031e-06	3.48113e-05	1.5898	-0.880736	1.1603	1.25218	0.113906	0.184055	0.497099	0.336123	1.00974	0.932481	0.0645639	0.120701	0.905444	-0.597297	1.10742	1.00608
PE 40:6	0.000371396	0.00133359	1.50509	-0.801638	1.10059	1.13197	0.0182608	0.0375294	1.05978	-0.483669	1.0714	1.04749	0.437855	0.547171	0.488586	-0.229427	1.06898	0.975964
PE 42:1	0.0175965	0.0373174	1.10717	-0.663789	1.07041	1.14635	0.546627	0.636933	0.253414	-0.157846	1.09964	0.940045	0.0012382	0.00407336	1.63365	-0.666306	1.18543	1.03193
PE 42:2-1	0.00329599	0.00876733	0.937792	-0.660565	1.05523	1.20624	0.194269	0.280846	0.328867	-0.0601494	1.13265	0.958862	0.00604723	0.0153405	0.96515	-0.66333	1.20785	0.991525
PE 42:5-1	0.000554039	0.00186875	1.50887	-0.642959	1.10034	1.10426	0.00357986	0.00903211	1.21048	0.532183	0.948502	0.90674	0.0593688	0.112342	1.21204	-0.40445	1.03713	1.06426
PE 44:5-2	0.0207785	0.0433739	1.06916	0.658696	0.92878	0.90036	0.00853093	0.0193714	1.1868	-0.691606	1.09116	1.13062	0.118069	0.199496	0.705603	0.0708822	1.09707	1.00958
PE O-34:1	0.000290855	0.00112415	1.51172	0.705105	0.864329	0.948237	0.0557062	0.1009	0.916151	-0.517122	1.06925	1.02832	7.8396e-10	1.32823e-07	1.31246	-0.863369	1.01326	1.36157
PE O-36:1	0.0193106	0.0405827	0.898286	0.617757	0.938498	0.873338	0.221239	0.312555	0.477352	-0.377075	0.990221	1.11209	0.00119723	0.00396662	1.51469	-0.513864	1.01764	1.28302
PE O-36:4	1.72405e-07	1.862e-06	1.43089	0.875131	0.838275	0.775022	0.013074	0.028241	0.651241	0.231043	0.856991	1.03447	2.51379e-09	2.12437e-07	1.68504	-0.796567	1.0076	1.76153
PE O-38:4	3.99821e-07	3.92e-06	1.44714	0.869584	0.814336	0.769807	0.177082	0.262104	0.367293	0.0536148	0.891828	1.05485	2.03475e-07	4.2953e-06	1.49382	-0.723985	0.953172	1.60691
PE O-40:3	1.57184e-05	9.0787e-05	1.68415	0.871433	0.815901	0.802699	0.464068	0.565507	0.368236	-0.277822	0.975191	1.07855	2.07485e-09	2.12437e-07	1.63424	-0.872236	1.03677	1.6348
PE O-40:4	2.88951e-06	2.08573e-05	1.66982	0.901171	0.820662	0.77562	4.14832e-05	0.000176422	1.44586	0.695827	0.810724	0.933637	0.000244965	0.00106091	1.54054	-0.61943	0.998734	1.24504
PE P-32:1	0.00404928	0.0105011	1.09899	-0.626861	1.00056	1.06691	1.72311e-05	8.47259e-05	1.54948	0.910712	0.707094	0.84252	0.000775602	0.00272625	1.8437	0.622231	0.934859	0.878337
PE P-34:2	0.0168258	0.0360111	0.856739	0.597451	0.960702	0.979365	6.80028e-06	4.01862e-05	1.75038	0.958606	0.636237	0.727029	0.000873556	0.00303617	0.975209	0.742109	1.00353	0.893796
PE P-35:1	0.0231638	0.0479104	0.96686	-0.618438	1.01069	1.06226	9.48262e-05	0.000357323	1.57055	0.909573	0.790441	0.835979	0.0134029	0.0310401	1.04452	0.466815	1.02788	0.90141
PE P-36:3-1	0.0080123	0.0189808	1.09815	0.653912	0.969379	0.881119	7.18843e-06	4.1577e-05	1.69843	0.907377	0.681949	0.800629	0.0326482	0.0669503	0.834075	0.658213	0.956158	0.943121
PE P-36:3-2	0.000128979	0.000563845	1.42692	0.808583	0.960396	0.900555	6.58057e-06	3.92691e-05	1.73471	0.917373	0.727137	0.800349	0.77246	0.825672	0.124464	0.32932	1.00083	1.00854
PE P-36:6	0.00692468	0.0168766	0.983364	-0.664345	1.03261	1.121	2.30472e-08	8.92208e-07	1.81375	0.971878	0.524035	0.573856	0.150992	0.238261	0.677597	0.0702341	1.03713	0.899912
PE P-37:1	0.0104866	0.0240468	1.07959	-0.690646	1.05837	1.11044	0.000141085	0.0004935	1.55043	0.87945	0.802886	0.790045	0.0136682	0.0315759	0.986464	0.471041	1.0572	0.833539
PE P-37:4	0.0106932	0.0244546	1.24513	0.599802	0.985833	0.966363	6.11479e-08	1.5288e-06	1.84532	0.986803	0.623955	0.70668	0.0804665	0.143789	1.16019	0.41812	0.981975	0.986435
PE P-38:3	0.010346	0.0237831	1.26238	0.639265	0.97078	0.946416	1.47464e-06	1.14047e-05	1.8067	0.959832	0.731376	0.764075	0.981695	0.991277	0.00672195	0.413598	1.03995	0.95871
PE P-38:4	0.00839752	0.0197926	1.21143	0.654938	0.984707	0.943366	5.6973e-07	6.31985e-06	1.78196	0.967919	0.688279	0.798912	0.253094	0.358646	0.672759	0.354929	0.974017	1.00202
PE P-38:5	9.88855e-05	0.000449151	1.44609	-0.842731	1.07326	1.07475	1.19237e-07	2.17233e-06	1.82619	0.990662	0.668648	0.706086	0.931432	0.960313	0.0431375	-0.17445	1.03369	0.969736
PE P-40:3	2.41774e-06	1.83172e-05	1.67547	0.902958	0.818117	0.775552	3.71907e-05	0.000162272	1.45122	0.697472	0.812205	0.933243	0.000236623	0.00104572	1.54053	-0.624206	0.998296	1.24505
PE P-40:6	0.000271472	0.00106009	1.54884	-0.844948	1.05056	1.06699	5.7947e-06	3.54638e-05	1.73986	0.959495	0.732563	0.781963	0.00249554	0.00728321	1.31005	0.66658	1.00741	0.909615
PE P-42:3	0.00256395	0.00706225	1.36758	0.728014	0.907151	0.8608	1.03559e-05	5.66222e-05	1.70984	0.881321	0.718369	0.811274	0.114599	0.195049	0.946164	-0.344487	0.994996	1.11005
PE P-42:6	0.0175238	0.0372481	1.15962	-0.638628	1.07795	1.05112	1.51943e-06	1.16952e-05	1.78071	0.957282	0.698286	0.757313	0.720464	0.784505	0.210983	0.187312	1.03387	0.953077
PE P-44:5	0.00731723	0.0177337	1.24473	0.578	0.955728	0.85876	3.35614e-06	2.23176e-05	1.73972	0.93379	0.660667	0.784234	0.295705	0.4019	0.704409	-0.3128	1.00165	1.06007
PEtOH 32:1	3.01543e-11	1.40581e-09	1.94354	-0.933934	3.75126	4.82578	0.436251	0.540093	0.22943	0.0321152	0.787904	1.31563	2.78731e-08	1.14553e-06	1.85944	-0.389388	1.8963	1.25688
PEtOH 34:1	2.63871e-09	5.34313e-08	1.87484	-0.91598	2.23929	4.30958	0.185668	0.270512	0.359114	0.339122	0.669505	1.12113	1.97577e-06	2.49105e-05	1.99934	-0.555908	1.72806	1.19668
PEtOH 34:2	3.84428e-10	1.1172e-08	1.91821	-0.901376	4.49434	8.64727	0.988568	0.994981	0.00448127	0.147554	0.702276	1.32593	4.67761e-08	1.40551e-06	1.83309	-0.352632	2.0166	1.36176
PEtOH 36:1	5.14205e-08	6.46668e-07	1.72904	-0.908071	1.51139	2.35826	0.108592	0.176746	0.372354	0.346996	0.696405	1.04685	8.64144e-05	0.000481667	1.80271	-0.79861	1.52399	1.15629
PEtOH 36:2	3.2223e-09	6.24546e-08	1.90607	-0.925169	2.41617	3.34526	0.392137	0.500109	0.258436	0.279012	0.710192	1.15888	1.08126e-06	1.45722e-05	1.88674	-0.440422	1.86748	1.2202
PG 30:0	3.90067e-07	3.86266e-06	0.914924	-0.237307	1.15308	1.56287	0.000193177	0.000641725	0.963148	-0.615476	1.06671	1.31123	0.355116	0.466734	0.167242	0.518514	0.946062	1.02349
PG 31:0	1.97887e-08	2.926e-07	1.42104	-0.542815	1.27357	1.79112	0.00242636	0.00638119	0.980456	-0.57032	1.02253	1.19482	0.000992038	0.00340794	1.29661	-0.155964	1.04379	1.19125
PG 32:0	1.56942e-08	2.47741e-07	0.991829	-0.27002	1.18434	1.48733	0.000105685	0.000388528	0.799527	-0.552544	1.09695	1.21044	0.000145882	0.000726877	0.977139	0.0639135	1.08352	1.21182
PG 32:1	2.29625e-09	4.97977e-08	1.36154	-0.514831	1.18247	1.66115	0.014944	0.0316922	0.759713	-0.348918	0.936711	1.22031	0.460184	0.570482	0.300806	0.498851	0.962116	1.00063
PG 33:1	5.54111e-08	6.79875e-07	1.53544	-0.627446	1.17407	1.4865	0.180119	0.264914	0.384497	-0.0981278	0.902794	1.17566	0.42734	0.537239	0.486847	-0.133167	0.971676	1.07775
PG 34:0	0.0123186	0.0275027	0.622242	-0.0785044	1.09851	1.12675	0.00324471	0.00829897	0.716095	-0.522181	1.05103	1.16812	0.000154544	0.000747694	1.47481	-0.227979	1.07263	1.31852
PG 34:1	0.00052434	0.00179354	1.2715	-0.489733	1.08048	1.28039	0.0306981	0.0596657	0.970709	-0.40539	1.00188	1.13518	0.702618	0.767767	0.258664	0.0371046	1.02879	1.00849
PG 34:2	2.32161e-10	7.19973e-09	1.49894	-0.60631	1.18515	1.60363	0.993625	0.996275	0.0014566	0.132118	0.828495	1.18934	0.567248	0.661789	0.286224	-0.148469	0.931629	1.10538
PG 35:1	0.000227153	0.000914879	0.855052	-0.214951	1.07304	1.20662	0.158392	0.24056	0.376978	-0.20714	0.912535	1.1719	0.0461861	0.0907157	0.687426	0.552483	0.896267	1.02864
PG 35:2	1.0784e-11	8.379e-10	1.65709	-0.704402	1.29147	1.81513	0.107217	0.175122	0.332402	0.299201	0.805771	1.13996	0.376887	0.48666	0.485278	-0.204491	0.953323	1.09974
PG 36:1	0.00289681	0.00788577	0.72117	-0.152446	1.07977	1.2599	0.0558223	0.100914	0.430135	-0.323309	0.947168	1.17301	0.752151	0.808706	0.0941936	0.340113	0.932877	1.10607
PG 36:2	7.24714e-07	6.4116e-06	1.08537	-0.35872	1.09659	1.51762	0.563393	0.653005	0.134188	0.135126	0.819616	1.18396	0.143063	0.229948	0.632571	-0.0855733	0.944388	1.15571
PG 36:3	3.51257e-06	2.49451e-05	0.572638	-0.0369918	1.10313	1.30558	1.241e-06	1.01267e-05	0.887262	0.454089	0.58848	1.1831	0.18371	0.277652	0.268144	0.10798	0.83697	1.35123
PG 36:4	1.78741e-11	1.11099e-09	1.90493	-0.880304	1.50516	1.64962	0.000332284	0.00103375	1.14933	0.689453	0.795265	1.0072	3.61989e-07	6.01825e-06	1.98788	-0.863315	1.08816	1.32841
PG 38:4	5.7111e-12	4.83274e-10	1.88248	-0.844644	3.01032	3.10579	0.000949477	0.0026612	1.14022	0.572106	0.723238	0.993288	3.01361e-07	5.22394e-06	2.16494	-0.626743	1.34125	1.6341
PG 38:5	5.01506e-05	0.000254001	1.27535	0.800503	0.780559	0.573633	1.5444e-06	1.1752e-05	1.3467	-0.766619	1.20127	1.82106	0.0501575	0.0972847	0.486825	0.580182	0.842793	1.00524
PG 38:6	7.50042e-07	6.4739e-06	1.50536	0.898593	0.852569	0.666921	4.75357e-08	1.41512e-06	1.65579	-0.940959	1.6443	1.7528	0.767539	0.8223	0.0564121	0.480897	1.01468	0.960153
PG 38:7	2.70701e-06	1.98662e-05	1.47316	0.886965	0.845673	0.730729	2.90883e-06	2.01372e-05	1.45844	-0.85064	1.2097	1.36881	0.00994314	0.0235549	0.577039	0.669574	0.95554	0.896958
PG 39:7	4.23193e-09	8.037e-08	1.66747	0.948906	0.772955	0.68448	6.47906e-08	1.54689e-06	1.69115	-0.940211	1.35428	1.54127	0.390642	0.500258	0.168008	0.540425	0.995981	0.962161
PG 40:6	5.33398e-09	9.92446e-08	1.7145	0.966135	0.719543	0.581958	4.36479e-06	2.76133e-05	1.27893	-0.729717	1.11229	1.40885	0.121483	0.20269	0.372894	0.576437	0.940581	0.959525
PG 40:7	1.21117e-05	7.36281e-05	1.21656	0.783669	0.790917	0.635479	8.03739e-07	7.71674e-06	1.17177	-0.670116	1.08351	1.61902	0.00062573	0.00226255	0.723643	0.676507	0.831656	0.914383
PG 40:8	2.05527e-08	2.99666e-07	1.55791	0.911396	0.801094	0.737479	1.01638e-05	5.6525e-05	1.2662	-0.746169	1.09643	1.26269	0.0307171	0.0638339	0.567755	0.236408	1.01967	1.09304
PG 42:10-1	1.0372e-08	1.82687e-07	1.88602	0.915061	0.73686	0.663485	0.0341315	0.0659262	1.00907	-0.473581	1.01057	1.09424	2.32296e-05	0.00016559	2.02557	-0.802733	1.09912	1.23841
PG 42:9-1	1.24263e-09	2.8861e-08	1.89586	0.955275	0.774118	0.686581	0.000289596	0.00091522	1.49721	-0.768069	1.0778	1.21966	0.000111264	0.00059052	1.75511	-0.656606	1.02705	1.19551
PG 42:9-2	6.70045e-05	0.000321531	1.38241	0.825171	0.786025	0.682354	0.697633	0.763216	0.114327	-0.0605389	0.803049	1.3165	0.957627	0.976488	0.0248503	0.126811	0.8146	1.25019
PG 44:10	8.07846e-06	5.18792e-05	1.34823	0.828018	0.789997	0.628084	0.656738	0.728752	0.124666	-0.164989	0.899619	1.21833	0.665331	0.741687	0.152064	0.410589	0.862672	1.1543
PG 44:11	7.35937e-11	2.85507e-09	1.91053	0.9531	0.762641	0.669558	0.00673513	0.0155593	1.05852	-0.660424	1.07091	1.08274	0.000327576	0.00135119	1.70275	-0.331395	1.09163	1.12091
PG 44:12	3.3773e-13	5.24463e-11	1.90785	0.990707	0.714116	0.634612	0.297189	0.399254	0.29209	0.0586204	0.923819	1.04811	0.00101246	0.00345273	1.12232	-0.0314381	1.04438	1.10658
PI 32:1	1.45549e-07	1.63766e-06	1.84324	-0.873718	1.88263	1.60073	0.00769088	0.0175495	1.08831	-0.634304	1.11845	1.122	0.0497247	0.0966466	1.24124	0.580484	0.816249	0.901864
PI 34:1	0.000527246	0.00179404	1.53052	-0.819132	1.36192	1.22569	0.372549	0.480393	0.481689	-0.277804	1.09481	0.997374	0.53507	0.639474	0.417018	0.046641	0.912696	1.00131
PI 34:2	3.38331e-08	4.4954e-07	1.8372	-0.970669	1.48425	1.66041	0.554464	0.645168	0.204691	0.0323871	1.03281	1.00173	0.00193595	0.0059681	1.58883	0.351454	0.802427	0.832406
PI 35:1	0.00771849	0.0184254	1.32492	-0.66242	1.38209	1.25492	0.32735	0.432288	0.544323	-0.314118	1.04269	1.09016	0.269703	0.377017	0.732541	0.213941	0.816516	0.995941
PI 35:2	4.23785e-06	2.92403e-05	1.74203	-0.934159	1.44907	1.58769	0.974118	0.982561	0.0132147	0.124026	1.02192	0.978773	0.0155486	0.0352209	1.23271	0.179375	0.768897	0.892624
PI 36:2	6.10306e-06	3.99937e-05	1.67016	-0.925052	1.31267	1.39033	0.0139292	0.0296074	1.00138	-0.434199	1.15462	1.03807	0.0170891	0.0381533	1.32614	0.282597	0.845723	0.850783
PI 36:3-1	0.0060816	0.0150584	1.30847	-0.746971	1.10632	1.17697	0.467595	0.568317	0.272823	-0.00303787	0.984328	1.05642	0.885081	0.923779	0.0602061	-0.328229	0.848536	1.12596
PI 36:4	0.00147967	0.0043594	1.50181	-0.773967	1.11446	1.13094	0.491863	0.592399	0.368389	-0.129346	1.00168	1.02365	0.594376	0.679808	0.234932	-0.226258	0.847157	1.10552
PI 36:5	1.41898e-12	1.46891e-10	1.95281	-0.961751	2.17495	2.37364	2.15277e-05	0.000101607	1.20543	-0.492591	1.04296	1.1969	0.941634	0.968433	0.0210764	-0.406765	0.863632	1.13547
PI 38:4;2O-1	0.0184266	0.0389006	0.820084	0.580482	0.739799	0.6678	4.99464e-05	0.000205562	1.62141	-0.93524	105.388	123.864	0.924702	0.954432	0.0449445	0.164678	0.737723	1.47852
PI 38:5	7.00324e-07	6.32718e-06	1.56728	-0.910535	1.19459	1.42437	0.0245364	0.0491255	0.361647	0.332037	0.96665	0.952827	0.735013	0.793979	0.0947032	-0.406576	0.893296	1.06163
PI 38:6	0.000255522	0.0010142	1.47946	-0.62537	1.33306	1.18182	3.3843e-06	2.23176e-05	1.26607	-0.595467	0.987843	1.34013	0.0419302	0.0844957	1.00416	0.328528	0.776108	1.06068
PI 39:6	1.59868e-07	1.75247e-06	1.74174	0.927404	0.777556	0.622629	7.66994e-06	4.38084e-05	0.819995	-0.534767	1.07523	1.14954	0.0647835	0.120869	0.851929	0.634	0.850423	0.984469
PI 40:5	1.68436e-06	1.33338e-05	1.69779	0.821671	0.923595	0.828852	0.000164861	0.000564761	1.16323	-0.696293	1.12651	1.03823	0.107657	0.184923	1.06866	0.44017	0.900258	0.962027
PI 40:6	7.50757e-07	6.4739e-06	1.7318	0.878234	0.850657	0.686518	0.000500795	0.00149019	1.04139	-0.645249	1.10193	1.10837	0.10705	0.184519	0.964066	0.53566	0.86358	0.974536
PI 40:7	0.000721765	0.00235853	1.43593	-0.646427	1.07518	1.12507	0.00489124	0.0117404	1.2279	-0.539702	1.01697	1.09047	0.00044746	0.00173399	1.90501	0.853168	0.879467	0.839391
PI 40:8	2.91593e-11	1.40581e-09	1.47216	-0.553959	2.18663	1.41241	0.00473511	0.0115092	0.337063	0.0879021	0.787957	1.17326	0.0148681	0.0340941	0.41998	0.301315	1.00691	1.22736
PI 41:7	0.00422089	0.0108516	1.00619	0.639614	0.92691	0.900073	0.196012	0.282051	0.339765	-0.21606	0.965683	1.08129	0.00741944	0.0182742	1.49326	0.751291	0.824279	0.882739
PI 42:7-1	2.24907e-08	3.22269e-07	1.73397	-0.953303	1.16603	1.30826	3.0016e-05	0.000133636	0.995327	0.634524	0.91287	0.926188	0.000181313	0.000851066	1.7003	0.379735	0.887909	0.853125
PI 42:7-2	0.00212889	0.00600606	1.359	0.726399	0.89757	0.897627	0.00729784	0.0167347	0.9997	-0.618495	1.13825	1.04546	0.0271499	0.0570577	1.22921	0.710524	0.937531	0.863625
PI 42:9	7.28417e-13	9.6824e-11	1.69638	-0.702995	3.25697	2.08681	9.68333e-05	0.000361931	0.611949	0.223195	0.758618	1.06128	0.018625	0.041384	0.479925	0.193812	0.939018	1.32114
PI O-34:1	0.000128269	0.000562113	1.65751	-0.859827	1.6362	1.614	0.232253	0.326628	0.65504	-0.332859	1.11366	1.06419	0.299308	0.406203	0.655819	0.0786855	0.830055	0.978788
PI O-36:2	0.000345969	0.00126324	1.57668	-0.841851	1.51497	1.62683	0.0917347	0.154161	0.775803	-0.322235	1.09981	1.12452	0.0760331	0.137718	1.04454	0.173762	0.765226	0.892121
PI O-36:4	1.72384e-10	6.10322e-09	1.93719	-0.958702	1.69088	1.75916	0.0940683	0.156949	0.615609	0.459054	0.904605	1.01156	0.371856	0.482842	0.330728	-0.469002	0.859305	1.22465
PI O-38:3	0.000640766	0.00212374	1.51417	-0.838462	1.5419	1.62194	0.519381	0.613066	0.321822	-0.117249	1.06962	1.03839	0.589912	0.67647	0.276748	-0.200922	0.797367	1.0738
PI O-38:4	0.000149314	0.000639258	1.65688	-0.847217	1.44874	1.40776	0.764569	0.815365	0.165664	0.0824221	0.961687	1.00785	0.680788	0.753564	0.197253	-0.358364	0.836418	1.22259
PI O-38:5	7.92757e-11	2.95313e-09	1.80563	-0.980609	1.4493	1.63537	0.463135	0.56511	0.136974	0.219451	0.990628	0.981992	0.357248	0.467789	0.241886	-0.526776	0.926072	1.12151
PI O-38:6	5.88151e-10	1.61008e-08	1.89559	-0.981144	1.55645	1.65818	0.0028319	0.0073236	0.816667	-0.232671	1.03484	1.12681	0.0970818	0.1687	0.687445	-0.108395	0.86758	0.998821
PI O-40:4	0.000342672	0.00126088	1.51531	-0.854498	1.5406	1.55512	0.564628	0.653005	0.249847	-0.0363352	1.01799	1.06403	0.249239	0.355347	0.422399	-0.536735	0.830298	1.33323
PI O-40:5	2.52909e-07	2.64655e-06	1.77253	-0.96446	1.76182	1.79893	0.448232	0.55126	0.270535	-0.0279249	1.02822	1.0435	0.666065	0.741687	0.156642	-0.454769	0.859966	1.16719
PI O-40:6	4.26031e-07	4.13131e-06	1.79883	-0.952801	1.47367	1.6083	0.0668903	0.117278	0.741857	-0.298055	1.07692	1.0935	0.887102	0.924851	0.0632079	-0.321897	0.896785	1.07564
PI O-40:7	1.25999e-12	1.46633e-10	1.73413	-0.966641	1.5455	1.89428	0.40137	0.509095	0.0726078	0.124042	1.01345	1.01023	0.0318368	0.0655754	0.528351	-0.22809	0.944574	0.923981
PS 38:6	0.0119356	0.026776	1.11686	0.622832	0.789066	0.87302	0.341981	0.447169	0.438799	-0.268799	1.10058	1.01249	0.696013	0.763644	0.268111	-0.00690166	0.990679	1.06588
PS 40:7	0.0129912	0.0286607	1.0788	0.577832	0.853877	0.952605	0.314762	0.418633	0.500603	0.244615	0.995765	0.932354	0.671808	0.745475	0.26946	0.320096	1.01407	0.955874
OxPE 38:4;2O-1	0.00520043	0.0129802	1.33463	-0.699449	1.16866	1.10763	1.79591e-05	8.82e-05	1.69469	-0.961833	4.11099	3.11188	0.579507	0.669381	0.375375	-0.0174487	0.962678	0.998611
CoQ10	0.00174533	0.00505193	1.16901	-0.734536	1.10759	1.27947	4.29545e-06	2.74199e-05	1.65616	0.922079	0.442818	0.537606	0.00073596	0.00261533	1.47012	-0.774815	1.26963	1.07394
CoQ9	0.00137956	0.00410343	1.25657	-0.76288	1.09838	1.27172	7.98252e-07	7.71674e-06	1.7222	0.947273	0.376395	0.511988	0.126588	0.208959	0.729866	-0.478771	1.15417	0.976136
Cer 34:0;2O	1.38677e-08	2.303e-07	1.67286	-0.926236	1.28921	1.36934	6.23855e-08	1.5288e-06	1.63094	-0.739941	1.32427	1.2414	2.99178e-09	2.31974e-07	1.91965	-0.986353	1.34126	1.51069
Cer 34:0;O	2.15949e-11	1.19935e-09	1.90273	-0.909303	1.45789	1.81504	1.45627e-07	2.48831e-06	1.60911	-0.721661	1.17737	1.37226	0.00486532	0.0129788	1.62623	-0.53654	1.08115	1.02781
Cer 34:1;2O	0.0130761	0.0287799	0.896838	0.336293	0.957087	0.828664	1.66496e-05	8.26449e-05	1.60041	-0.837344	1.2663	1.0868	0.856183	0.899668	0.0718534	0.144367	1.13177	0.888484
Cer 35:0;2O	3.74314e-07	3.78472e-06	1.42775	-0.848716	1.30257	1.46516	7.90736e-07	7.71674e-06	1.29788	-0.558505	1.36226	1.23855	4.52485e-09	2.97299e-07	1.88797	-0.984492	1.58809	1.72219
Cer 36:0;2O	5.94891e-06	3.92869e-05	1.23418	-0.772697	1.22372	1.35407	0.00375967	0.00946014	0.537562	-0.129629	1.11047	1.09451	3.72474e-10	1.1428e-07	1.76797	-0.966861	1.55338	1.96046
Cer 36:0;3O	0.00199141	0.00566974	1.24562	0.660097	0.733887	0.922923	0.0863013	0.146999	0.89123	-0.496527	1.03005	1.0526	0.635278	0.715168	0.210256	0.208005	1.07741	0.942721
Cer 36:0;O	1.32233e-08	2.2344e-07	1.59285	-0.644021	1.27799	1.54918	4.29292e-05	0.000181545	1.45382	-0.759311	1.04948	1.30569	0.000140403	0.000704541	1.65001	-0.317319	1.11062	1.16396
Cer 36:1;2O	1.62075e-05	9.25288e-05	1.75974	0.874483	0.726507	0.739888	0.116507	0.187337	0.848414	-0.504323	1.04816	1.03704	0.948479	0.970362	0.0394983	0.104669	1.04101	0.956585
Cer 38:0;3O	5.99955e-05	0.000295556	1.66636	0.834994	0.719949	0.79167	0.000171248	0.000581026	1.49597	-0.72903	1.09207	1.19034	0.509757	0.617948	0.397451	0.049976	1.057	0.975903
Cer 38:0;O	4.94537e-06	3.38857e-05	1.30879	-0.447895	1.22643	1.30259	8.06573e-06	4.54283e-05	1.3296	-0.680255	1.00895	1.40854	0.000150865	0.000732193	1.2491	-0.107661	1.04954	1.17916
Cer 38:1;2O	3.16853e-05	0.000166738	1.67475	0.803886	0.720996	0.632346	0.000854186	0.00243142	1.42885	-0.710533	1.09319	1.17328	0.959671	0.976488	0.0277636	0.10681	1.03038	0.972179
Cer 38:2;2O	2.91657e-07	3.02058e-06	1.83433	0.908526	0.630736	0.520093	0.00377727	0.0094788	1.14965	-0.651805	1.0126	1.12843	0.624676	0.706009	0.210628	0.319542	1.00727	1.0122
Cer 39:0;3O	0.0112173	0.0254095	1.23238	0.605145	0.934373	0.846519	5.04275e-06	3.12816e-05	1.69275	-0.858956	1.10803	1.21926	0.0449054	0.0890229	0.783536	0.11848	1.08931	0.986898
Cer 39:1;2O	0.000677213	0.00222716	1.32977	0.613567	0.899218	0.708103	0.000153229	0.000527567	1.58494	-0.826032	1.10871	1.18507	0.080782	0.144077	0.686694	0.133724	1.1056	0.966371
Cer 40:1;2O	0.000170143	0.00070031	1.44265	0.649593	0.804386	0.676189	8.14487e-05	0.000317085	1.44502	-0.680858	1.12156	1.13883	0.804612	0.853183	0.130821	-0.00656166	1.07119	0.943769
Cer 40:2;2O	0.000410816	0.00146606	1.36376	0.625031	0.864218	0.652175	0.000111982	0.000407313	1.65516	-0.848161	1.14664	1.16906	0.462049	0.572031	0.364616	0.197621	1.07846	0.958697
Cer 41:0;3O	0.0002374	0.000946983	1.60631	0.76741	0.810988	0.765067	8.41165e-05	0.000326238	1.52078	-0.744572	1.07532	1.14837	0.513066	0.620343	0.243785	0.446473	1.06105	0.917372
Cer 41:0;O	0.0243495	0.0499325	0.907938	-0.238257	1.11743	1.14393	0.000503695	0.00149434	1.26063	-0.715934	1.02491	1.24332	0.063332	0.118875	0.78588	0.0758722	1.02408	1.09237
Cer 41:1;2O	0.000114885	0.000514736	1.47288	0.685657	0.805428	0.623763	0.000628216	0.0018214	1.43788	-0.695152	1.076	1.13601	0.259309	0.365407	0.507898	0.499519	1.04796	0.901801
Cer 42:1;2O	0.000355962	0.00128963	1.44495	0.674115	0.810701	0.652209	0.201949	0.288365	0.658211	-0.306311	1.01952	1.04794	0.00382967	0.010707	1.32018	0.74467	0.9967	0.834303
Cer 42:2;2O-1	0.00033796	0.00125871	1.2838	0.516296	0.812428	0.761618	0.000169702	0.000579744	0.764598	-0.267675	1.05382	1.16125	0.00209383	0.00637045	1.07355	0.106968	1.00376	0.866485
Cer 42:2;2O-2	9.17811e-06	5.77472e-05	1.65039	0.842002	0.787707	0.537865	0.0203109	0.0411075	0.588359	0.107515	0.9186	0.959591	8.53207e-06	7.49192e-05	1.06318	0.808863	0.918413	0.840249
Cer 42:3;2O	1.89422e-05	0.000105999	1.50367	0.672544	0.814027	0.656421	0.0583613	0.10469	0.775771	-0.325657	1.02154	1.08645	0.0458354	0.0902173	1.07587	0.551606	1.01426	0.882779
Cer 43:1;2O	0.00254861	0.00704082	1.26576	0.579788	0.814727	0.625367	0.133622	0.20803	0.658097	0.428057	0.93597	0.976018	0.000148951	0.0007301	1.67666	0.790095	0.96819	0.770558
Cer 43:2;2O	0.000810954	0.00258895	1.12222	0.404895	0.822795	0.825343	0.000776834	0.00222581	0.647608	-0.202322	1.04388	1.17768	7.61138e-05	0.000429388	1.35878	0.291938	0.996229	0.786626
Cer 44:1;2O	0.00949605	0.0220469	1.17067	0.535659	0.795336	0.634005	0.102777	0.169355	0.527766	-0.137723	1.00494	1.08322	0.00012889	0.000674713	1.69221	0.745369	0.968668	0.744332
HexCer 34:0;2O	2.38698e-13	4.87844e-11	1.50631	-0.880015	1.33898	2.28851	1.31209e-05	6.85174e-05	0.270424	0.0260766	1.00834	1.13215	0.0733249	0.134117	0.151133	-0.54551	1.02742	1.03794
HexCer 34:1;2O	2.53389e-10	7.59816e-09	1.87837	-0.964678	1.49078	1.65719	4.07196e-05	0.000175425	1.17942	-0.486179	1.11776	1.10386	0.000733922	0.00261533	1.41573	0.3197	0.986638	0.862767
HexCer 36:0;2O	1.06402e-08	1.82752e-07	1.3662	-0.825659	1.22023	1.99092	0.178076	0.262739	0.131714	0.206988	0.971682	0.959251	0.00589195	0.0149874	0.427609	-0.624025	1.12074	1.08924
HexCer 36:1;2O	2.6162e-08	3.64063e-07	1.77038	-0.929204	1.2806	1.50499	0.404957	0.511554	0.20634	-0.0236823	1.05903	0.977603	0.163703	0.253168	0.549787	0.0545318	1.07239	0.878986
HexCer 38:0;2O	0.00423106	0.0108516	0.824675	-0.587614	1.11239	1.49004	0.101758	0.167973	0.305414	0.29824	0.9246	0.890299	0.586954	0.675469	0.144984	-0.460558	1.19662	0.950408
HexCer 38:1;2O	5.67892e-07	5.28808e-06	1.66753	-0.907819	1.2411	1.39785	0.24742	0.345226	0.337422	-0.0849912	1.07172	0.992003	0.277887	0.385564	0.448062	0.103455	1.09628	0.864677
HexCer 40:1;2O	0.000352037	0.00128013	1.39307	-0.791114	1.19527	1.2872	0.251038	0.349352	0.47029	0.313717	1.01201	0.903094	0.698342	0.763992	0.19991	0.113367	1.14011	0.850425
HexCer 40:2;3O	0.000422489	0.00149955	1.07063	-0.708777	1.60661	1.73623	0.341761	0.447169	0.238663	0.247478	1.0695	0.847612	0.284259	0.391486	0.431652	-0.479399	1.44624	0.962079
HexCer 41:1;2O	0.00315943	0.00842816	1.24178	-0.708698	1.14914	1.2674	0.238625	0.334578	0.50348	0.329138	0.99192	0.902365	0.525541	0.628893	0.340859	0.182172	1.131	0.830633
HexCer 42:1;2O	0.00641876	0.0156847	1.18714	-0.676751	1.15738	1.25196	0.118172	0.189361	0.716503	0.423107	0.988458	0.851512	0.555545	0.655355	0.319865	0.2156	1.14752	0.813663
HexCer 42:2;2O-1	2.48235e-09	5.13084e-08	1.80044	-0.892161	1.18615	1.47559	0.00668786	0.0154886	0.832155	-0.337349	1.04089	1.06264	0.510506	0.618051	0.274727	0.0977498	1.05758	0.929083
HexCer 42:2;2O-2	7.73259e-05	0.000358041	1.5777	-0.677289	1.28585	1.23134	0.0802666	0.138386	0.699329	-0.482697	1.03331	1.07758	0.00347145	0.00985458	1.29993	0.772597	0.913631	0.875539
HexCer 44:0;3O	8.17613e-05	0.000375152	0.89818	-0.625755	0.884424	1.80348	0.0408186	0.0763955	0.223836	0.0493529	0.958824	1.16092	0.0219665	0.047125	0.405318	-0.619874	1.07399	1.15775
HexCer 44:2;2O	4.29173e-08	5.47122e-07	1.64602	-0.821834	1.11108	1.51736	0.00263205	0.00690264	0.860953	-0.33978	1.05781	1.10586	0.697591	0.763992	0.165544	-0.0229262	1.07539	0.919001
SM 28:1;2O	0.0150393	0.0325619	1.15447	-0.49541	1.05958	1.09994	0.503462	0.600158	0.255611	-0.0155031	1.03041	0.93735	0.198123	0.295597	0.861285	-0.194624	1.02201	1.0325
SM 34:0;2O	0.00414746	0.0107228	0.767187	-0.558277	0.968706	1.11185	0.0365734	0.0694895	0.352972	-0.00972644	0.974028	1.08917	0.0465653	0.0911799	0.380608	-0.600344	0.964148	1.09032
SM 34:1;2O	0.00506074	0.0126655	0.880754	-0.623896	1.07154	1.0185	0.0149923	0.0317223	0.900686	-0.322241	1.02501	1.08649	0.000627168	0.00226255	1.24128	-0.784833	1.01784	1.19186
SM 34:2;2O	0.00491198	0.0123927	0.931079	-0.320681	1.03562	1.12023	0.64762	0.722943	0.16027	-0.0148614	0.91519	1.11308	0.246098	0.352488	0.405862	-0.380474	0.907285	1.152
SM 34:2;3O	7.29771e-07	6.4116e-06	1.67912	-0.742146	1.14129	1.23704	1.86001e-07	2.93502e-06	1.75275	0.950987	0.677902	0.827341	0.993953	0.998242	0.000620067	-0.190295	0.926239	1.07679
SM 36:2;2O	0.00962274	0.0222855	1.05311	0.613881	0.974994	0.964934	0.132551	0.207051	0.714423	0.390102	0.959798	1.00044	0.111058	0.190065	0.884654	-0.374013	0.984535	1.07104
SM 38:0;2O	0.000361299	0.00130268	1.26426	0.465271	0.837751	0.902708	0.00107952	0.00297348	0.889008	0.587082	0.894798	0.912594	0.951804	0.971633	0.0224049	-0.364725	1.0419	0.961944
SM 38:1;2O	0.0237726	0.0489653	0.860638	0.315353	0.987481	0.934105	0.644411	0.720224	0.241263	0.168047	1.00413	0.983092	0.0108601	0.0255322	1.52573	-0.527195	1.07355	1.02645
SM 38:2;2O	0.000276603	0.00107453	1.36678	0.577799	0.967627	0.905531	0.0491278	0.0902129	1.01326	-0.498708	1.01542	1.02071	7.39953e-07	1.09356e-05	1.99055	-0.904992	1.05472	1.1266
SM 39:0;2O	0.0153828	0.0332282	0.897018	0.267954	0.858318	0.929499	0.00448632	0.0109626	0.93146	0.578778	0.907797	0.867898	0.00340508	0.00974485	1.41531	-0.727224	1.24102	1.07556
SM 40:0;2O	0.0113625	0.0256508	0.890888	0.262588	0.816722	0.889617	0.0150812	0.0318381	0.845534	0.551995	0.912716	0.821372	0.565907	0.661789	0.283082	-0.0728388	1.13228	0.843652
SM 42:3;2O	0.0121737	0.0272444	1.23094	-0.688656	1.03183	1.02485	0.00576929	0.0135295	0.699624	0.456293	0.940341	1.01199	1.30409e-07	3.185e-06	1.71865	-0.90826	1.04657	1.21299
SM 42:4;2O	0.00499958	0.0125461	1.38027	-0.722974	1.04242	1.0462	0.114071	0.184055	0.272636	0.290417	0.920252	1.0507	3.47903e-11	3.23988e-08	1.98013	-0.93904	1.09026	1.25262
SM 52:3;3O	0.000598706	0.00199881	1.56744	0.755725	0.774246	0.721157	0.0138781	0.0296074	1.0174	-0.44637	1.00607	1.23681	0.0022983	0.00685807	1.47865	-0.731483	1.05085	1.40722
SM 54:3;3O	0.0078596	0.0186666	1.20181	0.654571	0.777718	0.789102	0.162216	0.243586	0.694849	-0.400029	1.02377	1.17381	0.154975	0.242898	0.914269	-0.30959	1.00864	1.27697
SM 58:3;3O	1.91722e-06	1.49736e-05	1.81842	0.87447	0.789391	0.783103	0.000154091	0.000529055	1.50224	-0.722249	1.08909	1.16015	1.87329e-05	0.000139278	2.05881	-0.886819	1.14989	1.22944
SM 60:3;3O	1.42354e-06	1.15967e-05	1.82152	0.878961	0.760256	0.779787	3.72666e-05	0.000162272	1.63629	-0.806376	1.15092	1.15564	2.73759e-06	3.00111e-05	2.2117	-0.879278	1.22143	1.20587
ASM 52:2;3O	0.00100988	0.00315503	1.45473	0.745699	0.753001	0.805357	0.27662	0.377615	0.580632	-0.309536	1.0364	1.06593	0.386184	0.496544	0.604627	-0.121528	1.04019	1.08243
CE 22:5	6.50906e-05	0.000314032	1.52549	0.666539	0.754117	0.733006	0.911821	0.93389	0.0364849	0.0615606	0.900052	1.0969	2.33147e-05	0.00016559	1.45786	-0.912445	1.13446	1.45969
CE 22:6	0.00228152	0.00637865	1.16774	0.438722	0.877046	0.825312	0.0646031	0.113697	0.780355	-0.364793	1.08884	1.08281	1.06991e-06	1.45722e-05	1.89842	-0.964157	1.24611	1.35563
CE 24:6	7.61852e-06	4.96099e-05	1.3879	0.811068	0.714115	0.795421	0.129164	0.202786	0.459025	0.234946	0.762386	1.15766	0.623687	0.706009	0.175038	-0.235423	0.845188	1.21862
CE 26:6	7.34741e-05	0.000343862	1.14081	0.704652	0.705178	0.867753	0.530612	0.621542	0.198914	0.128239	0.797533	1.19025	0.341428	0.452162	0.455028	-0.211738	0.904456	1.19854
ST 28:4;O-1	0.000735075	0.0023926	1.45926	-0.628751	1.81959	1.79135	1.75544e-07	2.8251e-06	1.83595	-0.987104	84.7199	90.7547	0.0425113	0.0854495	1.27565	-0.463007	1.17291	1.78025
Elaidylphosphocholine	2.35809e-05	0.000127742	1.1735	-0.41068	1.10415	1.3308	0.000416482	0.00126567	1.33444	-0.800979	1.20485	1.18564	0.110112	0.188793	0.654835	0.624173	0.971399	0.923371
