# Supplementary material for: Anti-Allergic Effect of Dietary Polyphenols Curcumin and Epigallocatechin Gallate via Anti-Degranulation in IgE/Antigen-Stimulated Mast Cell Model: A Lipidomics Perspective
Source: Metabolites. 2023 May 5;13(5):628. doi: 10.3390/metabo13050628 (PMC10223132; doi:10.3390/metabo13050628)
Supplement: Supplementary file 1 [file metabolites-13-00628-s001.zip › Table S4.xlsx]

## Sheet: Sheet1
Table S4. Changes in the content and composition of important lipids.
Compound	DBEs	Veh-1h				AG-1h				C10-1h				E200-1h				Veh-3h				AG-3				C10-3h				E200-3h
		Veh-1A	Veh-1B	Veh-1C	Veh-1D	AG-1A	AG-1B	AG-1C	AG-1D	C10-1A	C10-1B	C10-1C	C10-1D	E200-1A	E200-1B	E200-1C	E200-1D	Veh-3A	Veh-3B	Veh-3C	Veh-3D	AG-3A	AG-3B	AG-3C	AG-3D	C10-3A	C10-3B	C10-3C	C10-3D	E200-3A	E200-3B	E200-3C	E200-3D
FA 13:0	0	2.34048e-05	1.82909e-05	2.50598e-05	2.18705e-05	1.42276e-05	1.2649e-05	1.63965e-05	1.66723e-05	1.86689e-05	1.73028e-05	1.98651e-05	1.56807e-05	2.08274e-05	1.02361e-05	1.2026e-05	1.27227e-05	9.9806e-06	1.20533e-05	1.12971e-05	1.49975e-05	1.09152e-05	1.21033e-05	1.01685e-05	1.29693e-05	1.92593e-05	1.77884e-05	1.41445e-05	1.65482e-05	9.68398e-06	1.02272e-05	1.22756e-05	1.04665e-05
FA 14:0	0	0.000984597	0.000960111	0.00114675	0.00113536	0.000903816	0.000754762	0.000979645	0.000885456	0.000612626	0.000684203	0.000693664	0.000556083	0.000737539	0.000472892	0.000494786	0.000475231	0.000747309	0.000673946	0.00058566	0.000822841	0.000479055	0.000481904	0.000448286	0.000516779	0.000659113	0.0005642	0.000433366	0.000499154	0.000440415	0.00057236	0.000392927	0.000411634
FA 15:0	0	0.000537095	0.000506564	0.00067318	0.000590266	0.000381877	0.00033315	0.000406835	0.000425533	0.000478709	0.000520479	0.000785402	0.00050506	0.000420297	0.000229915	0.000320272	0.000257589	0.000375375	0.000345829	0.000262925	0.000375187	0.000228419	0.000227173	0.000228935	0.000243228	0.000576839	0.000520191	0.000366117	0.000480702	0.000232208	0.000250218	0.000223358	0.000245636
FA 16:0	0	0.0214055	0.0215515	0.02546	0.0235333	0.0233379	0.0192312	0.0222832	0.0208712	0.0169075	0.0173448	0.0190213	0.0174529	0.0289702	0.0203095	0.0201092	0.0183875	0.0237681	0.0195886	0.0185881	0.0263918	0.0206038	0.0198738	0.0189475	0.0207139	0.0191495	0.0181163	0.0158677	0.0160656	0.0195203	0.0215067	0.0177955	0.0184844
FA 17:0	0	0.000908487	0.000850478	0.00106578	0.00100722	0.000871126	0.000739917	0.000927919	0.000867553	0.000999208	0.00113318	0.00170913	0.00115355	0.000885154	0.000552075	0.000622705	0.000542838	0.00079378	0.000695382	0.000533909	0.000905673	0.000508677	0.000542896	0.00049107	0.000602295	0.00121372	0.00115337	0.000748685	0.00103271	0.000521912	0.00058004	0.000458168	0.000456746
FA 18:0	0	0.0283857	0.0289391	0.0367931	0.0317621	0.0367728	0.0280814	0.0335103	0.0296446	0.0237783	0.0251453	0.0281676	0.0258545	0.0483373	0.0333705	0.0314247	0.0275447	0.0380884	0.0286888	0.0227554	0.044181	0.0302889	0.028948	0.0263334	0.03347	0.0295945	0.0282131	0.0214756	0.0222957	0.0287682	0.0317106	0.0247879	0.0255461
FA 19:0	0	0.000193412	0.000192624	0.000222835	0.000215402	0.000212403	0.000179418	0.000205584	0.000194836	0.000211415	0.000232738	0.000303606	0.00024731	0.000247161	0.000183522	0.000183376	0.000175887	0.000199916	0.00018334	0.000154172	0.000230965	0.000175265	0.000173301	0.000174027	0.000182218	0.000232221	0.000227786	0.000179208	0.0002076	0.000170414	0.000169158	0.000158505	0.00016203
FA 20:0	0	0.00065011	0.000690496	0.000887229	0.000754163	0.00077128	0.000587151	0.000722732	0.000616094	0.0005607	0.000618938	0.000759798	0.000649637	0.00100532	0.000680218	0.000659042	0.000580596	0.00087115	0.000694333	0.000490432	0.00100388	0.000651227	0.000652315	0.000569716	0.000747359	0.000731875	0.000736973	0.000533201	0.000574219	0.000628435	0.000677324	0.000538078	0.000546561
FA 21:0-2peaks	0	5.11373e-05	5.16521e-05	7.11238e-05	5.00023e-05	4.32677e-05	3.64517e-05	4.38178e-05	4.28006e-05	6.72155e-05	7.26392e-05	0.000100731	6.76458e-05	5.67833e-05	4.02014e-05	4.11476e-05	3.8887e-05	5.41411e-05	4.49604e-05	3.70618e-05	5.99628e-05	3.96608e-05	4.13406e-05	3.92836e-05	3.48493e-05	7.02343e-05	6.75611e-05	4.96795e-05	6.33774e-05	3.45834e-05	4.54067e-05	3.26037e-05	3.42563e-05
FA 22:0	0	0.000587031	0.000605434	0.000727316	0.000649285	0.000522242	0.000483192	0.000568803	0.000508833	0.000726919	0.000764152	0.00090421	0.000801942	0.000607808	0.000478027	0.000493231	0.00046879	0.000748258	0.000710909	0.000598794	0.000804755	0.000479673	0.00052238	0.000445439	0.000509265	0.000780358	0.00083368	0.000741342	0.000764938	0.000445562	0.000481377	0.000405803	0.000400021
FA 23:0	0	0.000390869	0.000389615	0.000473659	0.000391254	0.000306143	0.000284238	0.000321428	0.000308774	0.000472649	0.000461969	0.000516156	0.000462898	0.0003711	0.000295341	0.000325366	0.000301297	0.000446492	0.000421066	0.000378928	0.000396212	0.000244988	0.000305926	0.000236282	0.000253238	0.00043753	0.0004658	0.000448461	0.000450438	0.000220591	0.000247879	0.000225514	0.000209816
FA 24:0	0	0.00194321	0.00194821	0.00211225	0.00194418	0.00167695	0.00175781	0.00184589	0.00183053	0.00204501	0.00205182	0.00219547	0.00210271	0.00167437	0.00150509	0.00164283	0.00148041	0.00178579	0.001797	0.00162733	0.00172316	0.00124286	0.00144776	0.0012098	0.00129198	0.00202676	0.00212944	0.00212369	0.00204543	0.00137113	0.00141027	0.00134253	0.0013251
FA 25:0	0	0.000237328	0.000234997	0.000317513	0.000264847	0.000188546	0.000155677	0.000195512	0.000196637	0.000172454	0.000167915	0.000184873	0.00015948	0.000249473	0.000157322	0.000192249	0.000166567	0.0002263	0.000207409	0.000158665	0.000194385	0.000145412	0.000248127	0.000131952	0.000146637	0.000190303	0.000173449	0.00017615	0.000169333	0.000131671	0.000163891	0.00016089	0.000147962
FA 26:0	0	0.000587805	0.000624477	0.000726579	0.000733372	0.000554309	0.000566191	0.000639185	0.000644577	0.000479453	0.000462843	0.000542518	0.000500549	0.000567558	0.000462154	0.000500655	0.000487675	0.000478666	0.000494195	0.000409828	0.000470739	0.000352587	0.000526596	0.000387556	0.000367843	0.000495595	0.000461816	0.000500377	0.000454566	0.000408287	0.000442812	0.00040678	0.000428271
FA 14:1	1	5.73924e-05	4.63559e-05	6.40441e-05	5.8021e-05	3.18856e-05	2.8772e-05	3.34132e-05	4.05884e-05	2.57349e-05	2.2064e-05	3.30961e-05	2.84123e-05	3.34937e-05	1.93958e-05	1.95364e-05	2.38046e-05	2.54976e-05	2.60923e-05	2.19648e-05	3.20145e-05	2.42188e-05	2.44017e-05	2.39172e-05	1.3877e-05	3.45207e-05	2.19051e-05	1.75905e-05	2.82047e-05	2.13355e-05	2.1894e-05	2.11611e-05	2.10411e-05
FA 18:1	1	0.0119655	0.0110125	0.0128762	0.0145884	0.0112499	0.01088	0.0128953	0.0133052	0.00473307	0.00520847	0.00611508	0.0058088	0.00708123	0.00447642	0.00488959	0.00450541	0.00832743	0.0082987	0.00848998	0.00939853	0.00483504	0.00495672	0.00442933	0.00483842	0.00498843	0.00486441	0.00436256	0.00465664	0.00427944	0.00496186	0.00383445	0.00374648
FA 19:1	1	0.00048542	0.000454627	0.000489955	0.000616455	0.000442522	0.000440914	0.000509785	0.000530238	0.000174229	0.000195833	0.000232213	0.000226463	0.000224119	0.000151895	0.000148934	0.000161103	0.000296428	0.000310849	0.000309037	0.00034202	0.000166883	0.000159091	0.00015199	0.000158553	0.000176903	0.000168162	0.000153373	0.000178057	0.000133313	0.000157451	0.000116982	0.0001163
FA 20:1	1	0.000886234	0.000842617	0.000967458	0.00115563	0.000818476	0.000805861	0.000914433	0.000934675	0.0003836	0.000412507	0.000491246	0.000494994	0.000456425	0.000313107	0.000334621	0.000319469	0.000597159	0.000599164	0.000593841	0.000644364	0.000336626	0.00035793	0.00028961	0.000334066	0.00034529	0.000348486	0.000321935	0.000331228	0.00027226	0.000310367	0.00023765	0.000239652
FA 21:1	1	6.32608e-05	5.86796e-05	6.24081e-05	7.85278e-05	5.46927e-05	5.39106e-05	6.27823e-05	6.00865e-05	4.31938e-05	4.91027e-05	6.37399e-05	5.19617e-05	3.27396e-05	2.27833e-05	2.33149e-05	2.30035e-05	4.03485e-05	4.24777e-05	3.96828e-05	4.28181e-05	2.46558e-05	2.72183e-05	2.30767e-05	2.59507e-05	4.56503e-05	4.44721e-05	3.71692e-05	4.30953e-05	2.05422e-05	2.40515e-05	1.94545e-05	1.83952e-05
FA 22:1	1	0.000300533	0.000328479	0.000438663	0.000437995	0.000324068	0.000298458	0.000332166	0.000403129	0.000292353	0.000303221	0.000588032	0.000274479	0.000243882	0.000243245	0.000222513	0.000199658	0.00037805	0.000263098	0.000286585	0.000412974	0.000223597	0.000163285	0.000216564	0.000196657	0.000275258	0.000348441	0.000216025	0.000218978	0.000216984	0.000192175	0.000218043	0.000237542
FA 23:1	1	0.000131194	0.000123861	0.000137006	0.000146284	0.000100126	0.000103958	0.000108535	0.000109126	0.000145736	0.000167411	0.000217701	0.000162464	6.79532e-05	5.72537e-05	5.91067e-05	5.48137e-05	0.000103498	0.000106378	0.000106823	0.000110946	5.71644e-05	5.5664e-05	5.09499e-05	5.67932e-05	0.000155674	0.000151253	0.000131268	0.000148033	4.18837e-05	4.66437e-05	4.3184e-05	4.1291e-05
FA 24:1	1	0.0015175	0.00145265	0.00155417	0.00178515	0.00118217	0.00129426	0.0013301	0.00136048	0.00170378	0.00177373	0.00214648	0.00189296	0.000845371	0.000746796	0.000774499	0.000755281	0.00131304	0.00134356	0.00138607	0.00138313	0.000732268	0.000752628	0.000694668	0.00072793	0.00155199	0.00165566	0.0015715	0.00166043	0.000573082	0.000604618	0.000567088	0.000544339
FA 25:1	1	0.000212639	0.000201647	0.000230271	0.000252993	0.000191043	0.000204798	0.000218821	0.000216927	0.000155774	0.000163586	0.00016778	0.000184483	0.000133852	0.000107867	0.000112375	0.000110245	0.000155148	0.000157175	0.000158388	0.000148321	9.42232e-05	0.000105072	8.91073e-05	9.35488e-05	0.000154044	0.000151241	0.000148676	0.000143061	8.27814e-05	8.2198e-05	7.81663e-05	7.87866e-05
FA 26:1	1	0.000677064	0.000661356	0.000708886	0.000830467	0.000638615	0.000662951	0.000700734	0.000700343	0.000471261	0.00049057	0.000534644	0.000556527	0.000446652	0.00036042	0.000372266	0.000360226	0.000436939	0.00043753	0.000448562	0.000442654	0.000290361	0.000333558	0.000282911	0.000314357	0.000433661	0.000446765	0.000418825	0.000415198	0.000299118	0.000308904	0.000274332	0.000291203
FA 16:2	2	6.2969e-05	5.11924e-05	6.57222e-05	7.09439e-05	5.11191e-05	5.15284e-05	5.81041e-05	6.6439e-05	2.96043e-05	2.93826e-05	3.61976e-05	3.7973e-05	3.24697e-05	2.02529e-05	2.01609e-05	2.35531e-05	4.05904e-05	4.14844e-05	4.22788e-05	4.81446e-05	2.45926e-05	2.73975e-05	2.28491e-05	2.68578e-05	3.14976e-05	2.69276e-05	3.0794e-05	2.80045e-05	2.11149e-05	2.0373e-05	1.78171e-05	2.07573e-05
FA 18:2	2	0.00305095	0.00264741	0.00422814	0.00317478	0.00316128	0.00257668	0.00350549	0.00348274	0.00216716	0.00194117	0.00275879	0.00211457	0.00296686	0.00231445	0.0027729	0.00233617	0.00329926	0.00261034	0.00249357	0.00297787	0.00237411	0.00286684	0.00213433	0.00227429	0.00251798	0.0021101	0.00177681	0.00194823	0.00218838	0.00254015	0.00153853	0.00168418
FA 19:2	2	0.000130018	0.000126006	0.000139333	0.000162882	0.000120791	0.000129025	0.000131059	0.000140454	4.72595e-05	4.97263e-05	5.69264e-05	5.56947e-05	5.42408e-05	3.70959e-05	3.61558e-05	4.1998e-05	8.19299e-05	8.68363e-05	9.47748e-05	0.00010348	4.30771e-05	4.81073e-05	4.18353e-05	4.56809e-05	5.04334e-05	4.55196e-05	4.40505e-05	4.74034e-05	3.81021e-05	4.36007e-05	3.62019e-05	3.13012e-05
FA 20:2	2	0.00086245	0.000785089	0.000869956	0.00105025	0.00070467	0.000735359	0.000829101	0.000866334	0.000268469	0.000302338	0.000337902	0.000347891	0.000360598	0.00023374	0.000232809	0.000262621	0.000559914	0.000574365	0.000607099	0.000629539	0.000266357	0.000298656	0.000255005	0.000291704	0.000317838	0.000274629	0.000270087	0.000294578	0.000242228	0.000277782	0.00021145	0.000212362
FA 21:2	2	5.06513e-05	4.4896e-05	5.23951e-05	6.93985e-05	4.32256e-05	4.50345e-05	4.79173e-05	4.58799e-05	1.4609e-05	1.79565e-05	2.02868e-05	2.03964e-05	2.05733e-05	1.28415e-05	1.27185e-05	1.23015e-05	3.19817e-05	3.74472e-05	3.4941e-05	3.6753e-05	1.48963e-05	1.70426e-05	1.19111e-05	1.45675e-05	1.53838e-05	1.49722e-05	1.50791e-05	1.60585e-05	1.23776e-05	1.39631e-05	1.05528e-05	1.12356e-05
FA 22:2	2	0.000108937	0.000103517	0.000119054	0.000153944	9.03565e-05	9.25309e-05	0.000103525	0.000106554	4.01455e-05	4.53814e-05	5.73119e-05	5.75732e-05	4.34199e-05	3.13096e-05	3.09088e-05	3.17027e-05	7.95248e-05	7.88539e-05	8.19446e-05	8.65436e-05	3.50006e-05	3.88234e-05	3.41396e-05	3.791e-05	3.99192e-05	4.10171e-05	3.90092e-05	3.88852e-05	3.41471e-05	3.58735e-05	2.83861e-05	3.02709e-05
FA 24:2	2	0.000153538	0.000137945	0.000167569	0.000191888	0.00011756	0.000127669	0.00013596	0.000148609	0.000100058	0.000107218	0.000130277	0.0001258	6.39747e-05	5.04652e-05	5.38688e-05	5.12191e-05	0.000112738	0.000114035	0.000124626	0.00012327	5.4398e-05	5.62976e-05	5.16054e-05	5.28416e-05	8.56797e-05	9.19549e-05	8.63526e-05	9.14487e-05	4.42069e-05	4.93117e-05	4.01603e-05	4.10235e-05
FA 26:2	2	7.70542e-05	6.91977e-05	8.51808e-05	9.8804e-05	7.10601e-05	6.98931e-05	7.46079e-05	7.77812e-05	5.02745e-05	5.37782e-05	6.58065e-05	6.29098e-05	3.87399e-05	2.96982e-05	2.91665e-05	3.01755e-05	4.82651e-05	5.0208e-05	5.4006e-05	4.84612e-05	2.67737e-05	2.65969e-05	2.39387e-05	2.62918e-05	4.24112e-05	4.56401e-05	4.1325e-05	4.19169e-05	2.34067e-05	2.49754e-05	2.08765e-05	2.33392e-05
FA 18:3	3	0.000258571	0.000217802	0.000324959	0.000254144	0.000268959	0.000233872	0.000295524	0.000298059	0.000184222	0.000187972	0.000250663	0.000218373	0.000206684	0.000166721	0.000180169	0.00015359	0.000244852	0.000220961	0.000219691	0.00024755	0.000168296	0.000195601	0.000153104	0.000154564	0.000220563	0.00019222	0.000155356	0.00017749	0.00015263	0.000172042	0.000108297	0.000111726
FA 20:3	3	0.00141612	0.0013757	0.0012895	0.0016644	0.00136673	0.00148479	0.00163009	0.00184434	0.000517082	0.000581883	0.000680456	0.000715195	0.000797956	0.000524534	0.000473331	0.000578973	0.000919494	0.0010046	0.0010959	0.00119459	0.000530647	0.000546994	0.000509806	0.000617799	0.000529647	0.000508249	0.000600021	0.000566715	0.000524123	0.000646274	0.000528151	0.000486315
FA 21:3	3	4.23642e-05	3.60805e-05	4.01936e-05	5.46523e-05	4.26034e-05	4.63292e-05	5.37702e-05	5.63504e-05	1.24075e-05	1.55043e-05	1.7494e-05	1.95332e-05	1.65687e-05	1.10206e-05	1.05388e-05	1.21056e-05	3.34014e-05	3.49777e-05	3.72123e-05	3.87507e-05	1.30364e-05	1.26657e-05	1.23489e-05	1.42685e-05	1.36426e-05	1.40963e-05	1.4996e-05	1.50338e-05	1.45577e-05	1.73631e-05	1.29112e-05	1.26306e-05
FA 22:3	3	0.000198063	0.000180941	0.000211916	0.000276465	0.000165211	0.000170185	0.000191334	0.000204689	5.65234e-05	7.09685e-05	8.59229e-05	9.648e-05	7.1394e-05	5.23954e-05	5.19437e-05	5.72032e-05	0.000150891	0.000150919	0.000158672	0.000168292	6.09637e-05	6.60209e-05	6.07334e-05	7.06213e-05	6.51308e-05	6.71441e-05	6.76969e-05	6.72843e-05	6.99078e-05	7.67728e-05	5.70716e-05	6.06424e-05
FA 24:3	3	6.36195e-05	5.76808e-05	6.61181e-05	8.81193e-05	5.11651e-05	5.42226e-05	5.94158e-05	6.1631e-05	2.70831e-05	3.04867e-05	3.7518e-05	3.92108e-05	2.3639e-05	1.78575e-05	1.7677e-05	1.93643e-05	4.27142e-05	4.38507e-05	4.66794e-05	4.73646e-05	1.94075e-05	2.02873e-05	1.9811e-05	2.09678e-05	2.55985e-05	2.73853e-05	2.69159e-05	2.72053e-05	2.10681e-05	2.30936e-05	1.79349e-05	1.82943e-05
FA 26:3	3	4.92353e-05	4.7201e-05	5.60432e-05	6.90753e-05	4.28029e-05	4.75408e-05	5.24808e-05	5.13837e-05	2.32226e-05	2.65852e-05	3.14019e-05	3.48999e-05	2.39676e-05	1.84637e-05	1.78556e-05	1.82344e-05	3.24996e-05	3.2351e-05	3.78013e-05	3.62065e-05	1.55622e-05	1.56618e-05	1.60312e-05	1.667e-05	2.10765e-05	2.21941e-05	2.24063e-05	2.12989e-05	1.73668e-05	1.77388e-05	1.40758e-05	1.53969e-05
FA 20:4	4	0.0020907	0.00202997	0.0017384	0.00210168	0.00212316	0.002301	0.00275442	0.00305632	0.00117279	0.0013229	0.00159103	0.00169369	0.00164563	0.00104329	0.000924622	0.00112208	0.00130832	0.00167743	0.00159851	0.00183501	0.000845845	0.000974968	0.000880971	0.00108027	0.00118713	0.00118918	0.00122789	0.0012241	0.00088286	0.00118871	0.000870028	0.000823566
FA 22:4	4	0.000561303	0.000499319	0.000549406	0.000715403	0.000466734	0.000500488	0.000545565	0.000592652	0.000155172	0.000190169	0.00021137	0.00024556	0.00020605	0.000144851	0.000134704	0.00015682	0.000388027	0.00040104	0.000430813	0.000429029	0.000155185	0.000165008	0.000150375	0.000179282	0.000156928	0.000173397	0.000171558	0.000172633	0.000172023	0.000208264	0.000146338	0.000145146
FA 24:4	4	8.88987e-05	8.30571e-05	9.88573e-05	0.000129835	7.28543e-05	7.64081e-05	8.4521e-05	8.86359e-05	2.70421e-05	3.24304e-05	3.55999e-05	4.33921e-05	3.46275e-05	2.64221e-05	2.34999e-05	2.77158e-05	5.59411e-05	5.77009e-05	6.55002e-05	6.69239e-05	2.73644e-05	2.55777e-05	2.45785e-05	2.85554e-05	2.73487e-05	2.98893e-05	3.30661e-05	2.95098e-05	3.18532e-05	3.32891e-05	2.5736e-05	2.68706e-05
FA 26:4	4	2.09972e-05	1.94693e-05	2.35407e-05	3.1252e-05	1.90925e-05	1.99619e-05	2.22015e-05	2.29438e-05	9.54245e-06	1.06583e-05	1.25947e-05	1.42324e-05	8.54668e-06	6.3355e-06	6.30798e-06	7.38895e-06	1.32368e-05	1.44069e-05	1.46596e-05	1.56256e-05	6.82639e-06	7.11438e-06	6.95022e-06	7.41027e-06	9.11274e-06	9.10618e-06	8.98354e-06	9.3579e-06	7.41069e-06	8.26077e-06	6.11529e-06	6.77526e-06
FA 20:5	5	0.000516594	0.00052149	0.00040063	0.000385965	0.000495099	0.000502242	0.00060213	0.000632704	0.000405846	0.000442952	0.000518483	0.000552914	0.000369486	0.000279095	0.000262236	0.000303576	0.000413876	0.000562594	0.000531953	0.000655873	0.000353612	0.000373074	0.000390451	0.000339014	0.000557903	0.000612443	0.000487677	0.000498913	0.000359661	0.000389794	0.000302949	0.000278055
FA 22:5	5	0.00283403	0.00250977	0.00265691	0.00334414	0.00233005	0.00255752	0.00272262	0.00305581	0.00102525	0.00119461	0.0013942	0.00152571	0.00122379	0.000895555	0.000830217	0.000974835	0.0023846	0.00254397	0.00276091	0.00276774	0.00102158	0.00106688	0.00102787	0.00116848	0.00115285	0.0011829	0.00122364	0.00123262	0.00113244	0.00132772	0.00100876	0.00100772
FA 24:5	5	0.00012144	0.000102977	0.000122025	0.000174198	9.56181e-05	0.000100017	0.000112262	0.000117486	3.64592e-05	4.38446e-05	5.43256e-05	6.45928e-05	4.41173e-05	3.39544e-05	3.19465e-05	3.59952e-05	7.54553e-05	8.10028e-05	8.80139e-05	8.93613e-05	3.55064e-05	3.56434e-05	3.63208e-05	4.05495e-05	4.55092e-05	4.63299e-05	4.80835e-05	4.63423e-05	5.31046e-05	5.84771e-05	4.59383e-05	4.87092e-05
FA 22:6	6	0.00613363	0.00523073	0.0056699	0.00696156	0.00452668	0.00487059	0.00519821	0.00579178	0.00184131	0.00227609	0.00271353	0.00307866	0.00196584	0.00145754	0.00126223	0.00158606	0.00385857	0.00434777	0.00452827	0.00468236	0.00160071	0.00159512	0.00155239	0.00176248	0.00204621	0.00200373	0.00211796	0.00227267	0.00164309	0.002124	0.00156416	0.00154019
FA 24:6	6	0.000518854	0.000461486	0.000533374	0.000745688	0.00044476	0.000459969	0.000500663	0.000521288	0.000122887	0.000138937	0.000159957	0.000190695	0.000150799	0.000111391	0.000100971	0.000113144	0.000319389	0.000317637	0.000356728	0.000371282	0.000163693	0.000144044	0.000151941	0.000163476	0.000135096	0.000122316	0.000144097	0.000150698	0.000120397	0.000136859	0.000110608	0.000110988
FA 28:7	7	0.000114927	0.000111883	0.000114962	0.000120571	0.000120278	0.00012589	0.000126563	0.000132309	0.000107561	0.000103635	0.00010461	0.000118537	0.000149316	0.000120269	0.00012123	0.000128331	0.000128891	0.000128153	0.000133171	0.000144943	0.000146841	0.000150712	0.000153532	0.000143553	0.000125564	0.000109622	0.000135543	0.000118307	0.00014032	0.000146859	0.000143187	0.000148782
FA 34:9	9	0.000187651	0.000173892	0.000199513	0.000172575	0.000178557	0.000179239	0.000176934	0.000204062	0.000179207	0.000179526	0.000161183	0.00017766	0.00017783	0.000184882	0.000179981	0.000189017	0.000159211	0.000158843	0.000159043	0.000134241	0.000124427	0.000138715	0.000114	0.000118085	0.000148069	0.000138515	0.000138605	0.000142045	0.000124123	0.00011417	0.000125665	0.000104324
FA 36:10	10	4.28473e-05	2.22373e-05	7.37172e-05	4.68013e-05	5.49644e-05	7.36201e-05	6.22975e-05	0.000108447	7.27139e-05	2.98482e-05	5.42217e-05	4.78863e-05	3.68059e-05	3.5691e-05	7.61824e-05	0.000109674	2.33937e-05	6.41552e-05	2.54757e-05	3.81648e-05	3.06757e-05	0.000108646	6.84819e-05	5.56623e-05	7.89805e-05	1.19499e-05	6.14169e-05	3.19848e-05	4.7835e-05	5.95387e-05	1.3258e-05	4.3692e-05
FA-SFA		0.0568857	0.0575636	0.0707024	0.0630527	0.0665569	0.0532032	0.0626672	0.0570541	0.0475308	0.0496782	0.0559043	0.05053	0.0841509	0.0587469	0.0570215	0.0509206	0.0685937	0.0545578	0.0465924	0.0775755	0.0554514	0.0540037	0.0496534	0.0590926	0.0561778	0.0536815	0.0436577	0.0451203	0.0529034	0.0582683	0.0469409	0.048409
FA-MUFA		0.0162967	0.0151828	0.0175291	0.0199499	0.0150335	0.0147739	0.0171061	0.0176608	0.00812874	0.0087865	0.01059	0.00968155	0.00956572	0.00649918	0.00695675	0.00651302	0.0116735	0.011585	0.0118409	0.0129578	0.00678504	0.00693557	0.00625212	0.00676015	0.00816142	0.00820079	0.00737892	0.00782293	0.00594074	0.00671016	0.00541051	0.00533503
FA-PUFA		0.0197564	0.0176469	0.0198973	0.0223094	0.0172254	0.0176316	0.0200768	0.0217757	0.00869389	0.00942595	0.0115781	0.0117	0.0107339	0.00786011	0.00789433	0.00838385	0.014807	0.0154359	0.0158222	0.0170174	0.00815939	0.00902249	0.00790531	0.00875185	0.00964751	0.00911143	0.00898942	0.00931073	0.00811873	0.00975525	0.00700516	0.00704429
LPC O-16:0	0	8.77111e-05	0.000100291	0.000117968	0.000113049	7.32581e-05	7.53831e-05	9.40293e-05	8.61549e-05	8.13076e-05	8.19174e-05	0.000105472	9.97277e-05	0.000102351	7.46701e-05	8.32317e-05	9.75817e-05	5.77149e-05	6.58112e-05	6.03891e-05	9.41816e-05	7.45678e-05	7.94429e-05	7.45068e-05	7.66004e-05	9.58623e-05	7.4545e-05	8.65832e-05	9.38613e-05	7.69148e-05	8.38755e-05	6.80398e-05	8.81307e-05
LPC O-18:0	0	6.9374e-05	6.94385e-05	7.22973e-05	7.02755e-05	4.50646e-05	4.94987e-05	5.08244e-05	4.95184e-05	4.84848e-05	5.24099e-05	6.37757e-05	5.97215e-05	4.85144e-05	4.39129e-05	4.88229e-05	5.09124e-05	3.71399e-05	4.04034e-05	3.96888e-05	5.4072e-05	3.44242e-05	3.67829e-05	3.61887e-05	3.80186e-05	4.45328e-05	4.03569e-05	4.41283e-05	4.72946e-05	3.61169e-05	4.04538e-05	3.46207e-05	4.15877e-05
LPC O-20:0	0	1.20124e-05	1.21434e-05	1.27163e-05	1.23633e-05	8.89338e-06	9.50961e-06	1.03354e-05	1.00586e-05	1.01522e-05	1.0983e-05	1.29337e-05	1.14783e-05	9.9426e-06	9.57403e-06	1.01132e-05	1.01449e-05	8.56774e-06	8.93076e-06	9.2283e-06	1.02069e-05	7.44724e-06	7.26664e-06	7.45084e-06	7.19668e-06	9.29496e-06	9.49264e-06	9.4395e-06	9.85253e-06	7.50533e-06	8.41993e-06	8.48036e-06	8.47846e-06
LPC O-22:0	0	3.50903e-05	3.40298e-05	3.24754e-05	3.12366e-05	2.07389e-05	2.20636e-05	2.27226e-05	2.18338e-05	2.45765e-05	2.55911e-05	2.90566e-05	2.63866e-05	2.2032e-05	2.25631e-05	2.40722e-05	2.25987e-05	2.72755e-05	2.66516e-05	2.77067e-05	2.78433e-05	1.59092e-05	1.56404e-05	1.59155e-05	1.60922e-05	2.27112e-05	2.42952e-05	2.31123e-05	2.37369e-05	1.71642e-05	1.88216e-05	1.92516e-05	1.86897e-05
LPC O-24:0	0	7.22792e-05	6.80336e-05	6.36052e-05	5.85486e-05	4.26534e-05	4.59295e-05	4.34952e-05	4.64586e-05	4.60148e-05	4.29106e-05	4.71354e-05	4.43767e-05	3.91908e-05	4.52047e-05	4.65278e-05	4.25221e-05	5.96699e-05	5.99481e-05	5.66727e-05	5.5384e-05	3.48862e-05	3.52374e-05	3.33654e-05	3.62742e-05	4.55584e-05	4.5573e-05	4.84622e-05	4.32638e-05	3.39478e-05	3.69612e-05	3.74658e-05	3.31709e-05
LPC O-15:1	1	1.32101e-05	1.3097e-05	1.56769e-05	1.61472e-05	1.67846e-05	1.6734e-05	1.91247e-05	1.66051e-05	2.10396e-05	2.32958e-05	2.80322e-05	2.37007e-05	1.95681e-05	1.46194e-05	1.61726e-05	1.84156e-05	9.95942e-06	9.57943e-06	9.37312e-06	1.29995e-05	1.40615e-05	1.50893e-05	1.40611e-05	1.2226e-05	2.11845e-05	1.74406e-05	1.66632e-05	1.78762e-05	1.38996e-05	1.35575e-05	1.23265e-05	1.32185e-05
LPC O-18:1-1	1	3.20225e-05	3.81826e-05	4.09545e-05	3.80752e-05	2.85244e-05	3.11947e-05	3.92958e-05	3.4236e-05	3.3474e-05	3.50491e-05	4.28836e-05	3.86548e-05	4.30459e-05	3.22123e-05	3.61917e-05	4.18247e-05	2.40421e-05	2.70627e-05	2.68635e-05	3.66296e-05	3.325e-05	3.3488e-05	3.35401e-05	3.1206e-05	4.25489e-05	3.48246e-05	3.78401e-05	3.86562e-05	3.42092e-05	3.61253e-05	3.19693e-05	3.72076e-05
LPC O-18:1-2	1	3.89174e-05	3.7556e-05	3.82968e-05	3.64692e-05	4.352e-05	4.36993e-05	4.25532e-05	4.55655e-05	4.01683e-05	4.1558e-05	4.27169e-05	4.07055e-05	4.23258e-05	3.94434e-05	4.24602e-05	4.45185e-05	2.84948e-05	2.67437e-05	2.86362e-05	3.23296e-05	3.66628e-05	3.61033e-05	3.8138e-05	3.56285e-05	3.7901e-05	3.51186e-05	3.72738e-05	3.72781e-05	3.64781e-05	3.68083e-05	3.40838e-05	3.72377e-05
LPC O-24:1	1	3.23487e-05	3.13455e-05	2.9103e-05	2.67065e-05	1.65029e-05	1.80193e-05	1.74795e-05	1.77383e-05	2.16849e-05	2.23837e-05	2.39972e-05	2.16871e-05	1.7667e-05	1.91603e-05	1.91653e-05	1.7928e-05	2.48472e-05	2.30468e-05	2.48277e-05	2.37559e-05	1.27679e-05	1.27559e-05	1.19194e-05	1.31339e-05	1.83728e-05	2.04884e-05	1.86648e-05	1.92172e-05	1.25357e-05	1.43055e-05	1.34251e-05	1.29527e-05
LPC O-18:2	2	1.67911e-05	1.61402e-05	1.71043e-05	1.62961e-05	1.68822e-05	1.76252e-05	1.90714e-05	1.7826e-05	1.63207e-05	1.70043e-05	1.9182e-05	1.83665e-05	1.87196e-05	1.71713e-05	1.72828e-05	1.95488e-05	1.12222e-05	1.1403e-05	1.19997e-05	1.34958e-05	1.65973e-05	1.50627e-05	1.67335e-05	1.4076e-05	1.65784e-05	1.43053e-05	1.6129e-05	1.53827e-05	1.58971e-05	1.54846e-05	1.51556e-05	1.70954e-05
LPC O-SFA		0.000276467	0.000283937	0.000299062	0.000285473	0.000190608	0.000202384	0.000221407	0.000214024	0.000210536	0.000213812	0.000258373	0.000241691	0.00022203	0.000195925	0.000212768	0.00022376	0.000190368	0.000201745	0.000193686	0.000241688	0.000167235	0.00017437	0.000167427	0.000174182	0.00021796	0.000194263	0.000211725	0.000218009	0.000171649	0.000188532	0.000167858	0.000190057
LPC O-MUFA		0.000116499	0.000120181	0.000124031	0.000117398	0.000105332	0.000109647	0.000118453	0.000114145	0.000116367	0.000122287	0.00013763	0.000124748	0.000122607	0.000105435	0.00011399	0.000122687	8.73435e-05	8.64326e-05	8.97005e-05	0.000105715	9.67421e-05	9.74366e-05	9.76586e-05	9.21943e-05	0.000120007	0.000107872	0.000110442	0.000113028	9.71226e-05	0.000100797	9.18047e-05	0.000100616
LPC O-PUFA		1.67911e-05	1.61402e-05	1.71043e-05	1.62961e-05	1.68822e-05	1.76252e-05	1.90714e-05	1.7826e-05	1.63207e-05	1.70043e-05	1.9182e-05	1.83665e-05	1.87196e-05	1.71713e-05	1.72828e-05	1.95488e-05	1.12222e-05	1.1403e-05	1.19997e-05	1.34958e-05	1.65973e-05	1.50627e-05	1.67335e-05	1.4076e-05	1.65784e-05	1.43053e-05	1.6129e-05	1.53827e-05	1.58971e-05	1.54846e-05	1.51556e-05	1.70954e-05
